# Supplementary material for: Regulation of multiple signaling pathways promotes the consistent expansion of human pancreatic progenitors in defined conditions
Source: eLife. 2024 Jan 5;12:RP89962. doi: 10.7554/eLife.89962 (PMC10945307; doi:10.7554/eLife.89962)
Supplement: Supplementary file 1. — (a) Expansion conditions tested and corresponding doubling times. ND; not determined. (b) Regulated genes in CINI expansion. In group 1, there are genes continuously upregulated in p5 and p10, in group 2 genes upregulated at p5 but stable at p10, in group 3 genes downregulated at p5 but stable in p10, and in group 4 genes continuously downregulated. (c) Gene regulation of components of selected signaling pathways during expansion in CINI. (d) Basal media and supplements for S1–S7. (e) Normalized RNA-Seq counts of selected genes from feeder-expanded cells, fibronectin-expanded cells, and vitronectin-N-expanded cells. (f) List of primary antibodies for immunofluorescense (IF) and flow cytometry (FC). [file elife-89962-supp1.xlsx]

## Sheet: Supplementary file 1a
			Final concentration	CINI	C0	C1	C2	C3	C4	C5	C6	C7	C8
	Basal Components	B-27 Supplement, serum-free with Vitamin A (Gibco, 17504044)	1X	•
		B-27 Supplement, serum-free without Vitamin A (Gibco, 12587010)	1X		•	•	•	•	•	•	•	•	•
		GlutaMAX (100X) (Gibco, 35050038)	1X	•	•	•	•	•	•	•	•	•	•
		BSA Fatty acid-free, low-endotoxin (20,000X) (LSP, BSA-68700)	5 ug/ml	•	•	•	•	•	•	•	•	•	•
		PEN/STREP (100X) (Gibco, 15140-122)	1X	•	•	•	•	•	•	•	•	•	•
		DMEM High Glucose (Gibco, 21969035)	1X	•	•	•	•	•	•	•	•	•	•
			Final concentration	CINI	C0	C1	C2	C3	C4	C5	C6	C7	C8
	Supplements	A83-01, ALK5/4/7 inhibition (R&D systems, 2939/10)	0.5 uM	•
		Human thermostable K128N FGF2 (Biomol ABE-32-8372-10)	10 ng/ml	•	•					•	•	•	•
		Human EGF, premium grade (Miltenyi Biotec, 130-097-750)	50 ng/ml	•	•	•	•	•	•	•	•	•	•
		StemMACS RepSox, ALK5 inhibition (Miltenyi Biotec, 130-117-340)	10 uM		•	•	•	•	•	•	•	•	•
		FGF18, Human (GenScript, Z03011)	20 ng/ml			•	•	•	•	•	•	•	•
		y-Secretase Inhibitor XXI, Notch inhibition (Millipore, 565790)	0.1 uM				•		•
		CP 673451, PDGF inhibition (MedChemExpress, HY-12050)	0.1 uM					•	•
		Endo-IWR-1, Canonical Wnt inhibition (PeproTech, 1128234)	10 uM								•		•
		LDN 193189, BMP Type I Receptor inhibition (Tocris, 6053)	0.1 uM									•	•
		Doubling Time (Td) (days) in H1-PP cells		ND	3.9	3.6	no expansion	no expansion	no expansion	2.3	2.2	17.3	3.5
		Supplementary file 1a Expansion conditions tested and corresponding doubling times. ND; not determined

## Sheet: Supplementary file 1b
Ensembl ID	Gene Symbol	PP P0	PP P5	PP P10	log2(fold change) P0 to P5	log2(fold change) P5 to P10	Description
	GROUP 1
ENSG00000120437	ACAT2	836.4	2212.1	5433.5	1.4	1.3	acetyl-CoA acetyltransferase 2 [Source:HGNC Symbol;Acc:HGNC:94]
ENSG00000114948	ADAM23	270.1	582.8	965.6	1.11	0.73	ADAM metallopeptidase domain 23 [Source:HGNC Symbol;Acc:HGNC:202]
ENSG00000116771	AGMAT	67.7	176.7	313.1	1.39	0.82	agmatinase [Source:HGNC Symbol;Acc:HGNC:18407]
ENSG00000106305	AIMP2	293.7	550.3	1011.4	0.91	0.88	aminoacyl tRNA synthetase complex interacting multifunctional protein 2 [Source:HGNC Symbol;Acc:HGNC:20609]
ENSG00000100478	AP4S1	96.2	184.4	300.7	0.94	0.71	adaptor related protein complex 4 sigma 1 subunit [Source:HGNC Symbol;Acc:HGNC:575]
ENSG00000084674	APOB	578.1	1693.1	4647.4	1.55	1.46	apolipoprotein B [Source:HGNC Symbol;Acc:HGNC:603]
ENSG00000137135	ARHGEF39	309.7	586.7	1007.1	0.92	0.78	Rho guanine nucleotide exchange factor 39 [Source:HGNC Symbol;Acc:HGNC:25909]
ENSG00000105011	ASF1B	564.3	1229.3	2080.2	1.12	0.76	anti-silencing function 1B histone chaperone [Source:HGNC Symbol;Acc:HGNC:20996]
ENSG00000169136	ATF5	138.6	241.6	804.5	0.8	1.74	activating transcription factor 5 [Source:HGNC Symbol;Acc:HGNC:790]
ENSG00000198513	ATL1	98.9	173.8	374.9	0.82	1.11	atlastin GTPase 1 [Source:HGNC Symbol;Acc:HGNC:11231]
ENSG00000157087	ATP2B2	13	249.6	684.4	4.24	1.46	ATPase plasma membrane Ca2+ transporting 2 [Source:HGNC Symbol;Acc:HGNC:815]
ENSG00000172318	B3GALT1	657.8	2190.9	3931.3	1.74	0.84	beta-1,3-galactosyltransferase 1 [Source:HGNC Symbol;Acc:HGNC:916]
ENSG00000162630	B3GALT2	36.7	206.5	390.2	2.5	0.92	beta-1,3-galactosyltransferase 2 [Source:HGNC Symbol;Acc:HGNC:917]
ENSG00000197299	BLM	310	629.1	1100.6	1.02	0.81	Bloom syndrome RecQ like helicase [Source:HGNC Symbol;Acc:HGNC:1058]
ENSG00000261236	BOP1	331.1	749	1447	1.18	0.95	block of proliferation 1 [Source:HGNC Symbol;Acc:HGNC:15519]
ENSG00000139618	BRCA2	227.1	492.3	952.2	1.12	0.95	BRCA2, DNA repair associated [Source:HGNC Symbol;Acc:HGNC:1101]
ENSG00000164076	CAMKV	14.4	150.8	310.4	3.41	1.04	CaM kinase like vesicle associated [Source:HGNC Symbol;Acc:HGNC:28788]
ENSG00000122483	CCDC18	145	303.5	594.7	1.07	0.97	coiled-coil domain containing 18 [Source:HGNC Symbol;Acc:HGNC:30370]
ENSG00000175305	CCNE2	24.8	82.8	363.2	1.74	2.13	cyclin E2 [Source:HGNC Symbol;Acc:HGNC:1590]
ENSG00000167775	CD320	943.6	1589.9	2548.8	0.75	0.68	CD320 molecule [Source:HGNC Symbol;Acc:HGNC:16692]
ENSG00000117877	CD3EAP	87.2	197	436.3	1.18	1.15	CD3e molecule associated protein [Source:HGNC Symbol;Acc:HGNC:24219]
ENSG00000164045	CDC25A	384.1	1029.4	2293.4	1.42	1.16	cell division cycle 25A [Source:HGNC Symbol;Acc:HGNC:1725]
ENSG00000093009	CDC45	180.5	430.6	863.1	1.26	1	cell division cycle 45 [Source:HGNC Symbol;Acc:HGNC:1739]
ENSG00000094804	CDC6	529.6	1099.4	2466.5	1.06	1.17	cell division cycle 6 [Source:HGNC Symbol;Acc:HGNC:1744]
ENSG00000176749	CDK5R1	115.6	218.4	362.1	0.92	0.73	cyclin dependent kinase 5 regulatory subunit 1 [Source:HGNC Symbol;Acc:HGNC:1775]
ENSG00000245848	CEBPA	982.4	1847.2	3442	0.91	0.9	CCAAT/enhancer binding protein alpha [Source:HGNC Symbol;Acc:HGNC:1833]
ENSG00000117724	CENPF	3053.8	5910.3	11882.7	0.95	1.01	centromere protein F [Source:HGNC Symbol;Acc:HGNC:1857]
ENSG00000102384	CENPI	187.8	415.8	709	1.15	0.77	centromere protein I [Source:HGNC Symbol;Acc:HGNC:3968]
ENSG00000100162	CENPM	163.7	278.1	495.8	0.76	0.83	centromere protein M [Source:HGNC Symbol;Acc:HGNC:18352]
ENSG00000166451	CENPN	289.4	593.6	998.8	1.04	0.75	centromere protein N [Source:HGNC Symbol;Acc:HGNC:30873]
ENSG00000151725	CENPU	616.8	1301.5	2799.7	1.08	1.11	centromere protein U [Source:HGNC Symbol;Acc:HGNC:21348]
ENSG00000167670	CHAF1A	731.8	1699.3	3018.9	1.22	0.83	chromatin assembly factor 1 subunit A [Source:HGNC Symbol;Acc:HGNC:1910]
ENSG00000159259	CHAF1B	402.8	681.1	1175.3	0.76	0.79	chromatin assembly factor 1 subunit B [Source:HGNC Symbol;Acc:HGNC:1911]
ENSG00000128973	CLN6	292.4	489.4	1152.1	0.74	1.24	ceroid-lipofuscinosis, neuronal 6, late infantile, variant [Source:HGNC Symbol;Acc:HGNC:2077]
ENSG00000092853	CLSPN	300.2	663.4	1632.9	1.15	1.3	claspin [Source:HGNC Symbol;Acc:HGNC:19715]
ENSG00000102879	CORO1A	50.3	138	299.1	1.45	1.12	coronin 1A [Source:HGNC Symbol;Acc:HGNC:2252]
ENSG00000080618	CPB2	37.2	72.8	271.4	0.96	1.9	carboxypeptidase B2 [Source:HGNC Symbol;Acc:HGNC:2300]
ENSG00000060566	CREB3L3	106.3	236	462.4	1.15	0.97	cAMP responsive element binding protein 3 like 3 [Source:HGNC Symbol;Acc:HGNC:18855]
ENSG00000171793	CTPS1	555.7	1463.3	2721	1.4	0.89	CTP synthase 1 [Source:HGNC Symbol;Acc:HGNC:2519]
ENSG00000103018	CYB5B	1692.7	2786.4	4637.9	0.72	0.74	cytochrome b5 type B [Source:HGNC Symbol;Acc:HGNC:24374]
ENSG00000241095	CYP51A1P1	158.4	263.2	449.1	0.73	0.77	cytochrome P450 family 51 subfamily A member 1 pseudogene 1 [Source:HGNC Symbol;Acc:HGNC:20245]
ENSG00000198924	DCLRE1A	363.6	588.4	945.3	0.69	0.68	DNA cross-link repair 1A [Source:HGNC Symbol;Acc:HGNC:17660]
ENSG00000182810	DDX28	147.1	286.4	526.2	0.96	0.88	DEAD-box helicase 28 [Source:HGNC Symbol;Acc:HGNC:17330]
ENSG00000035499	DEPDC1B	612.3	1160.6	1970.3	0.92	0.76	DEP domain containing 1B [Source:HGNC Symbol;Acc:HGNC:24902]
ENSG00000116133	DHCR24	7416.4	13136.9	27533.3	0.82	1.07	24-dehydrocholesterol reductase [Source:HGNC Symbol;Acc:HGNC:2859]
ENSG00000228716	DHFR	1189.4	3012.3	5116.3	1.34	0.76	dihydrofolate reductase [Source:HGNC Symbol;Acc:HGNC:2861]
ENSG00000231607	DLEU2	93.5	169.9	372.8	0.86	1.13	deleted in lymphocytic leukemia 2 (non-protein coding) [Source:HGNC Symbol;Acc:HGNC:13748]
ENSG00000011332	DPF1	28.1	113.9	421.2	2.02	1.89	double PHD fingers 1 [Source:HGNC Symbol;Acc:HGNC:20225]
ENSG00000245750	DRAIC	12.7	181.2	560.7	3.87	1.63	downregulated RNA in cancer, inhibitor of cell invasion and migration [Source:HGNC Symbol;Acc:HGNC:27082]
ENSG00000136982	DSCC1	122	364.1	601.7	1.58	0.72	DNA replication and sister chromatid cohesion 1 [Source:HGNC Symbol;Acc:HGNC:24453]
ENSG00000143476	DTL	345.5	1238.5	2166.6	1.84	0.81	denticleless E3 ubiquitin protein ligase homolog [Source:HGNC Symbol;Acc:HGNC:30288]
ENSG00000101412	E2F1	255.8	900.9	1521.1	1.82	0.76	E2F transcription factor 1 [Source:HGNC Symbol;Acc:HGNC:3113]
ENSG00000007968	E2F2	107.8	261.1	691.9	1.28	1.41	E2F transcription factor 2 [Source:HGNC Symbol;Acc:HGNC:3114]
ENSG00000165891	E2F7	397.7	894.9	1917.3	1.17	1.1	E2F transcription factor 7 [Source:HGNC Symbol;Acc:HGNC:23820]
ENSG00000118894	EEF2KMT	109.5	216.3	386	0.98	0.84	eukaryotic elongation factor 2 lysine methyltransferase [Source:HGNC Symbol;Acc:HGNC:32221]
ENSG00000141642	ELAC1	80	148.2	323.5	0.88	1.13	elaC ribonuclease Z 1 [Source:HGNC Symbol;Acc:HGNC:14197]
ENSG00000186871	ERCC6L	167.8	408.1	665.8	1.28	0.71	ERCC excision repair 6 like, spindle assembly checkpoint helicase [Source:HGNC Symbol;Acc:HGNC:20794]
ENSG00000171320	ESCO2	128.8	423.8	716.6	1.72	0.76	establishment of sister chromatid cohesion N-acetyltransferase 2 [Source:HGNC Symbol;Acc:HGNC:27230]
ENSG00000174371	EXO1	194.4	498.2	857.1	1.36	0.78	exonuclease 1 [Source:HGNC Symbol;Acc:HGNC:3511]
ENSG00000026103	FAS	90.3	155.7	314.4	0.78	1.01	Fas cell surface death receptor [Source:HGNC Symbol;Acc:HGNC:11920]
ENSG00000112029	FBXO5	443	1045.6	1747.7	1.24	0.74	F-box protein 5 [Source:HGNC Symbol;Acc:HGNC:13584]
ENSG00000168496	FEN1	617.3	1325.6	2969.5	1.1	1.16	flap structure-specific endonuclease 1 [Source:HGNC Symbol;Acc:HGNC:3650]
ENSG00000156427	FGF18	332.3	8916.7	15769.2	4.75	0.82	fibroblast growth factor 18 [Source:HGNC Symbol;Acc:HGNC:3674]
ENSG00000100350	FOXRED2	465.9	919.5	1798.6	0.98	0.97	FAD dependent oxidoreductase domain containing 2 [Source:HGNC Symbol;Acc:HGNC:26264]
ENSG00000089280	FUS	5613.9	10050.8	24939.9	0.84	1.31	FUS RNA binding protein [Source:HGNC Symbol;Acc:HGNC:4010]
ENSG00000100116	GCAT	111.2	523.1	880.1	2.23	0.75	glycine C-acetyltransferase [Source:HGNC Symbol;Acc:HGNC:4188]
ENSG00000145990	GFOD1	44.1	299.2	547.1	2.76	0.87	glucose-fructose oxidoreductase domain containing 1 [Source:HGNC Symbol;Acc:HGNC:21096]
ENSG00000101003	GINS1	646.9	1070.4	1725.6	0.73	0.69	GINS complex subunit 1 [Source:HGNC Symbol;Acc:HGNC:28980]
ENSG00000131153	GINS2	275	682.1	1328.9	1.31	0.96	GINS complex subunit 2 [Source:HGNC Symbol;Acc:HGNC:24575]
ENSG00000181938	GINS3	163.7	269.7	733.4	0.72	1.44	GINS complex subunit 3 [Source:HGNC Symbol;Acc:HGNC:25851]
ENSG00000147536	GINS4	512.2	1085.1	1752.9	1.08	0.69	GINS complex subunit 4 [Source:HGNC Symbol;Acc:HGNC:28226]
ENSG00000160818	GPATCH4	338.9	684.4	1326.6	1.02	0.96	G-patch domain containing 4 [Source:HGNC Symbol;Acc:HGNC:25982]
ENSG00000198822	GRM3	51.2	265.6	523.7	2.37	0.98	glutamate metabotropic receptor 3 [Source:HGNC Symbol;Acc:HGNC:4595]
ENSG00000188486	H2AFX	1754.5	2965.2	4867.6	0.76	0.72	H2A histone family member X [Source:HGNC Symbol;Acc:HGNC:4739]
ENSG00000164032	H2AFZ	5656.4	10058.3	17776.3	0.83	0.82	H2A histone family member Z [Source:HGNC Symbol;Acc:HGNC:4741]
ENSG00000119969	HELLS	673.6	1302.2	2102.5	0.95	0.69	helicase, lymphoid-specific [Source:HGNC Symbol;Acc:HGNC:4861]
ENSG00000144485	HES6	551.8	1474.4	2935.9	1.42	0.99	hes family bHLH transcription factor 6 [Source:HGNC Symbol;Acc:HGNC:18254]
ENSG00000135547	HEY2	30	237.9	438.8	2.99	0.88	hes related family bHLH transcription factor with YRPW motif 2 [Source:HGNC Symbol;Acc:HGNC:4881]
ENSG00000214821	HMGB1P4	117.6	193	349.8	0.72	0.86	high mobility group box 1 pseudogene 4 [Source:HGNC Symbol;Acc:HGNC:4996]
ENSG00000112972	HMGCS1	3874.9	8378.9	15710.3	1.11	0.91	3-hydroxy-3-methylglutaryl-CoA synthase 1 [Source:HGNC Symbol;Acc:HGNC:5007]
ENSG00000198830	HMGN2	3466.6	7850.6	12848.7	1.18	0.71	high mobility group nucleosomal binding domain 2 [Source:HGNC Symbol;Acc:HGNC:4986]
ENSG00000249014	HMGN2P4	208.8	442.5	771.6	1.09	0.8	high mobility group nucleosomal binding domain 2 pseudogene 4 [Source:HGNC Symbol;Acc:HGNC:33567]
ENSG00000234664	HMGN2P5	178.4	450.9	866.9	1.34	0.94	high mobility group nucleosomal binding domain 2 pseudogene 5 [Source:HGNC Symbol;Acc:HGNC:33568]
ENSG00000099783	HNRNPM	3111	5951.4	17956.1	0.94	1.59	heterogeneous nuclear ribonucleoprotein M [Source:HGNC Symbol;Acc:HGNC:5046]
ENSG00000067064	IDI1	985.9	1971.2	3208.4	1	0.7	isopentenyl-diphosphate delta isomerase 1 [Source:HGNC Symbol;Acc:HGNC:5387]
ENSG00000099869	IGF2-AS	843.3	1559.2	3103.9	0.89	0.99	IGF2 antisense RNA [Source:HGNC Symbol;Acc:HGNC:14062]
ENSG00000166130	IKBIP	445.5	888.5	1485.9	1	0.74	IKBKB interacting protein [Source:HGNC Symbol;Acc:HGNC:26430]
ENSG00000156113	KCNMA1	12.3	100	435	3.02	2.12	potassium calcium-activated channel subfamily M alpha 1 [Source:HGNC Symbol;Acc:HGNC:6284]
ENSG00000155666	KDM8	85.9	149.4	250.9	0.8	0.75	lysine demethylase 8 [Source:HGNC Symbol;Acc:HGNC:25840]
ENSG00000259417	LINC01314	275.9	531.2	1020.3	0.94	0.94	long intergenic non-protein coding RNA 1314 [Source:HGNC Symbol;Acc:HGNC:50507]
ENSG00000166035	LIPC	751	2085.2	3670.5	1.47	0.82	lipase C, hepatic type [Source:HGNC Symbol;Acc:HGNC:6619]
ENSG00000113368	LMNB1	2851.2	6416	10920.3	1.17	0.77	lamin B1 [Source:HGNC Symbol;Acc:HGNC:6637]
ENSG00000157193	LRP8	66.1	331.1	610.5	2.33	0.88	LDL receptor related protein 8 [Source:HGNC Symbol;Acc:HGNC:6700]
ENSG00000128606	LRRC17	123.1	667.9	1079.1	2.44	0.69	leucine rich repeat containing 17 [Source:HGNC Symbol;Acc:HGNC:16895]
ENSG00000065328	MCM10	259.6	751.4	1667.1	1.54	1.15	minichromosome maintenance 10 replication initiation factor [Source:HGNC Symbol;Acc:HGNC:18043]
ENSG00000073111	MCM2	1509.6	4386.2	7361.9	1.54	0.75	minichromosome maintenance complex component 2 [Source:HGNC Symbol;Acc:HGNC:6944]
ENSG00000104738	MCM4	2119.2	3920.6	7116.1	0.89	0.86	minichromosome maintenance complex component 4 [Source:HGNC Symbol;Acc:HGNC:6947]
ENSG00000100297	MCM5	1015	2462.9	3985.4	1.28	0.69	minichromosome maintenance complex component 5 [Source:HGNC Symbol;Acc:HGNC:6948]
ENSG00000076003	MCM6	1279.2	2465	4030.6	0.95	0.71	minichromosome maintenance complex component 6 [Source:HGNC Symbol;Acc:HGNC:6949]
ENSG00000166508	MCM7	3790.8	8110.2	13970.3	1.1	0.78	minichromosome maintenance complex component 7 [Source:HGNC Symbol;Acc:HGNC:6950]
ENSG00000172878	METAP1D	63.5	105.3	183.2	0.72	0.8	methionyl aminopeptidase type 1D, mitochondrial [Source:HGNC Symbol;Acc:HGNC:32583]
ENSG00000037897	METTL1	86.9	190	360.6	1.13	0.92	methyltransferase like 1 [Source:HGNC Symbol;Acc:HGNC:7030]
ENSG00000170854	MINA	134.6	347.6	612.1	1.37	0.82	MYC induced nuclear antigen [Source:HGNC Symbol;Acc:HGNC:19441]
ENSG00000215417	MIR17HG	47.9	84.2	212.3	0.82	1.34	miR-17-92a-1 cluster host gene [Source:HGNC Symbol;Acc:HGNC:23564]
ENSG00000148773	MKI67	3674.7	5927.4	9507.6	0.69	0.68	marker of proliferation Ki-67 [Source:HGNC Symbol;Acc:HGNC:7107]
ENSG00000164077	MON1A	92.7	169.1	285	0.87	0.75	MON1 homolog A, secretory trafficking associated [Source:HGNC Symbol;Acc:HGNC:28207]
ENSG00000175806	MSRA	114.8	233.2	393	1.03	0.75	methionine sulfoxide reductase A [Source:HGNC Symbol;Acc:HGNC:7377]
ENSG00000100714	MTHFD1	756.5	2143.4	3584.1	1.5	0.74	methylenetetrahydrofolate dehydrogenase, cyclohydrolase and formyltetrahydrofolate synthetase 1 [Source:HGNC Symbol;Acc:HGNC:7432]
ENSG00000110921	MVK	342.1	564	1075.9	0.72	0.93	mevalonate kinase [Source:HGNC Symbol;Acc:HGNC:7530]
ENSG00000118513	MYB	16.2	84.2	250.4	2.39	1.57	MYB proto-oncogene, transcription factor [Source:HGNC Symbol;Acc:HGNC:7545]
ENSG00000101057	MYBL2	1213.8	2369.3	3811.6	0.97	0.69	MYB proto-oncogene like 2 [Source:HGNC Symbol;Acc:HGNC:7548]
ENSG00000109805	NCAPG	820.7	2083.2	3474.4	1.34	0.74	non-SMC condensin I complex subunit G [Source:HGNC Symbol;Acc:HGNC:24304]
ENSG00000025770	NCAPH2	830.6	1361.2	2244.7	0.71	0.72	non-SMC condensin II complex subunit H2 [Source:HGNC Symbol;Acc:HGNC:25071]
ENSG00000177707	NECTIN3	610.3	1676.1	2827.6	1.46	0.75	nectin cell adhesion molecule 3 [Source:HGNC Symbol;Acc:HGNC:17664]
ENSG00000171208	NETO2	868.1	1504.4	3314.1	0.79	1.14	neuropilin and tolloid like 2 [Source:HGNC Symbol;Acc:HGNC:14644]
ENSG00000239672	NME1	221.9	512.5	1140.6	1.21	1.15	NME/NM23 nucleoside diphosphate kinase 1 [Source:HGNC Symbol;Acc:HGNC:7849]
ENSG00000055044	NOP58	1007.4	1689.9	3232.1	0.75	0.94	NOP58 ribonucleoprotein [Source:HGNC Symbol;Acc:HGNC:29926]
ENSG00000181019	NQO1	358.9	1864.1	6257.9	2.38	1.75	NAD(P)H quinone dehydrogenase 1 [Source:HGNC Symbol;Acc:HGNC:2874]
ENSG00000131910	NR0B2	215.9	561.6	1383.2	1.38	1.3	nuclear receptor subfamily 0 group B member 2 [Source:HGNC Symbol;Acc:HGNC:7961]
ENSG00000119900	OGFRL1	1100.5	1792.1	2895.8	0.7	0.69	opioid growth factor receptor like 1 [Source:HGNC Symbol;Acc:HGNC:21378]
ENSG00000162073	PAQR4	222	365.5	899.9	0.72	1.3	progestin and adipoQ receptor family member 4 [Source:HGNC Symbol;Acc:HGNC:26386]
ENSG00000132646	PCNA	1272.1	2392.3	6002.5	0.91	1.33	proliferating cell nuclear antigen [Source:HGNC Symbol;Acc:HGNC:8729]
ENSG00000163710	PCOLCE2	44.4	185.5	308.8	2.06	0.73	procollagen C-endopeptidase enhancer 2 [Source:HGNC Symbol;Acc:HGNC:8739]
ENSG00000178921	PFAS	923.4	2087.8	3424.2	1.18	0.71	phosphoribosylformylglycinamidine synthase [Source:HGNC Symbol;Acc:HGNC:8863]
ENSG00000277161	PIGW	103.2	226.8	513.9	1.13	1.18	phosphatidylinositol glycan anchor biosynthesis class W [Source:HGNC Symbol;Acc:HGNC:23213]
ENSG00000117461	PIK3R3	590.7	1540.7	2986.3	1.38	0.95	phosphoinositide-3-kinase regulatory subunit 3 [Source:HGNC Symbol;Acc:HGNC:8981]
ENSG00000100078	PLA2G3	33.1	130.3	336.2	1.98	1.37	phospholipase A2 group III [Source:HGNC Symbol;Acc:HGNC:17934]
ENSG00000052126	PLEKHA5	1527.1	2876.5	4673.6	0.91	0.7	pleckstrin homology domain containing A5 [Source:HGNC Symbol;Acc:HGNC:30036]
ENSG00000014138	POLA2	560.6	938.2	1708.3	0.74	0.86	DNA polymerase alpha 2, accessory subunit [Source:HGNC Symbol;Acc:HGNC:30073]
ENSG00000100479	POLE2	100.7	326.9	564.7	1.7	0.79	DNA polymerase epsilon 2, accessory subunit [Source:HGNC Symbol;Acc:HGNC:9178]
ENSG00000177700	POLR2L	766.3	1237.6	2140.4	0.69	0.79	RNA polymerase II subunit L [Source:HGNC Symbol;Acc:HGNC:9199]
ENSG00000221988	PPT2	409.1	696.5	1228.7	0.77	0.82	palmitoyl-protein thioesterase 2 [Source:HGNC Symbol;Acc:HGNC:9326]
ENSG00000057657	PRDM1	41.6	123.8	386.7	1.58	1.64	PR/SET domain 1 [Source:HGNC Symbol;Acc:HGNC:9346]
ENSG00000198890	PRMT6	413.3	734.3	1244.7	0.83	0.76	protein arginine methyltransferase 6 [Source:HGNC Symbol;Acc:HGNC:18241]
ENSG00000250799	PRODH2	29	167.9	282.7	2.55	0.75	proline dehydrogenase 2 [Source:HGNC Symbol;Acc:HGNC:17325]
ENSG00000135069	PSAT1	599.3	2525.9	5716.1	2.08	1.18	phosphoserine aminotransferase 1 [Source:HGNC Symbol;Acc:HGNC:19129]
ENSG00000165916	PSMC3	2063.1	3440	5577.3	0.74	0.7	proteasome 26S subunit, ATPase 3 [Source:HGNC Symbol;Acc:HGNC:9549]
ENSG00000104524	PYCRL	200.5	386.2	776.3	0.95	1.01	pyrroline-5-carboxylate reductase-like [Source:HGNC Symbol;Acc:HGNC:25846]
ENSG00000152932	RAB3C	231.4	717.2	1542.7	1.63	1.11	RAB3C, member RAS oncogene family [Source:HGNC Symbol;Acc:HGNC:30269]
ENSG00000051180	RAD51	242.6	399.3	676.8	0.72	0.76	RAD51 recombinase [Source:HGNC Symbol;Acc:HGNC:9817]
ENSG00000099901	RANBP1	2007.5	3400.8	5680.5	0.76	0.74	RAN binding protein 1 [Source:HGNC Symbol;Acc:HGNC:9847]
ENSG00000080839	RBL1	199.6	437	988.1	1.13	1.18	RB transcriptional corepressor like 1 [Source:HGNC Symbol;Acc:HGNC:9893]
ENSG00000160957	RECQL4	715.1	1144.8	2001	0.68	0.81	RecQ like helicase 4 [Source:HGNC Symbol;Acc:HGNC:9949]
ENSG00000133119	RFC3	342.5	906.7	1452	1.41	0.68	replication factor C subunit 3 [Source:HGNC Symbol;Acc:HGNC:9971]
ENSG00000234171	RNASEH1-AS1	64.7	117.6	205.8	0.87	0.81	RNASEH1 antisense RNA 1 [Source:HGNC Symbol;Acc:HGNC:49289]
ENSG00000171848	RRM2	1233.2	2697.8	6884.7	1.13	1.35	ribonucleotide reductase regulatory subunit M2 [Source:HGNC Symbol;Acc:HGNC:10452]
ENSG00000179041	RRS1	165.5	356.4	574.6	1.11	0.69	ribosome biogenesis regulator homolog [Source:HGNC Symbol;Acc:HGNC:17083]
ENSG00000144285	SCN1A	74.2	346.5	1094.9	2.22	1.66	sodium voltage-gated channel alpha subunit 1 [Source:HGNC Symbol;Acc:HGNC:10585]
ENSG00000170099	SERPINA6	417.8	886.3	1553.6	1.08	0.81	serpin family A member 6 [Source:HGNC Symbol;Acc:HGNC:1540]
ENSG00000156398	SFXN2	166.4	323.3	983.2	0.96	1.6	sideroflexin 2 [Source:HGNC Symbol;Acc:HGNC:16086]
ENSG00000165480	SKA3	216.2	633.5	1072.6	1.55	0.76	spindle and kinetochore associated complex subunit 3 [Source:HGNC Symbol;Acc:HGNC:20262]
ENSG00000115902	SLC1A4	63.5	159.4	582.7	1.34	1.87	solute carrier family 1 member 4 [Source:HGNC Symbol;Acc:HGNC:10942]
ENSG00000145217	SLC26A1	36.7	111.3	320.6	1.61	1.53	solute carrier family 26 member 1 [Source:HGNC Symbol;Acc:HGNC:10993]
ENSG00000142494	SLC47A1	58.9	350.7	851	2.57	1.28	solute carrier family 47 member 1 [Source:HGNC Symbol;Acc:HGNC:25588]
ENSG00000139514	SLC7A1	953.6	1553.3	2542.5	0.7	0.71	solute carrier family 7 member 1 [Source:HGNC Symbol;Acc:HGNC:11057]
ENSG00000151012	SLC7A11	75.4	293.9	1121.8	1.97	1.93	solute carrier family 7 member 11 [Source:HGNC Symbol;Acc:HGNC:11059]
ENSG00000157734	SNX22	151	249.1	594.5	0.72	1.26	sorting nexin 22 [Source:HGNC Symbol;Acc:HGNC:16315]
ENSG00000140263	SORD	1202	2012.6	3544.3	0.74	0.82	sorbitol dehydrogenase [Source:HGNC Symbol;Acc:HGNC:11184]
ENSG00000259479	SORD2P	1657.4	2768.4	4862.5	0.74	0.81	sorbitol dehydrogenase 2, pseudogene [Source:HGNC Symbol;Acc:HGNC:49919]
ENSG00000104549	SQLE	2193.1	3660.3	6358.2	0.74	0.8	squalene epoxidase [Source:HGNC Symbol;Acc:HGNC:11279]
ENSG00000161547	SRSF2	3040.5	5636	10124.7	0.89	0.85	serine and arginine rich splicing factor 2 [Source:HGNC Symbol;Acc:HGNC:10783]
ENSG00000112081	SRSF3	3736.3	6942.2	13387.8	0.89	0.95	serine and arginine rich splicing factor 3 [Source:HGNC Symbol;Acc:HGNC:10785]
ENSG00000147465	STAR	37.5	191.2	721.2	2.36	1.92	steroidogenic acute regulatory protein [Source:HGNC Symbol;Acc:HGNC:11359]
ENSG00000197457	STMN3	660.2	1685.6	2872.3	1.35	0.77	stathmin 3 [Source:HGNC Symbol;Acc:HGNC:15926]
ENSG00000182253	SYNM	53.6	217.8	509.6	2.02	1.23	synemin [Source:HGNC Symbol;Acc:HGNC:24466]
ENSG00000187325	TAF9B	240.3	583.6	961.1	1.28	0.72	TATA-box binding protein associated factor 9b [Source:HGNC Symbol;Acc:HGNC:17306]
ENSG00000136111	TBC1D4	766.2	1334.2	2186.3	0.8	0.71	TBC1 domain family member 4 [Source:HGNC Symbol;Acc:HGNC:19165]
ENSG00000075131	TIPIN	92.1	164	302	0.84	0.88	TIMELESS interacting protein [Source:HGNC Symbol;Acc:HGNC:30750]
ENSG00000158164	TMSB15A	309.3	720.4	1291	1.22	0.84	thymosin beta 15a [Source:HGNC Symbol;Acc:HGNC:30744]
ENSG00000132773	TOE1	122.2	197.3	625.7	0.69	1.67	target of EGR1, member 1 (nuclear) [Source:HGNC Symbol;Acc:HGNC:15954]
ENSG00000186854	TRABD2A	64	203.2	716.7	1.67	1.82	TraB domain containing 2A [Source:HGNC Symbol;Acc:HGNC:27013]
ENSG00000183763	TRAIP	247.3	402.1	671.1	0.7	0.74	TRAF interacting protein [Source:HGNC Symbol;Acc:HGNC:30764]
ENSG00000104691	UBXN8	136.8	259.8	435.4	0.92	0.75	UBX domain protein 8 [Source:HGNC Symbol;Acc:HGNC:30307]
ENSG00000154277	UCHL1	1616.4	2977.5	5275.7	0.88	0.83	ubiquitin C-terminal hydrolase L1 [Source:HGNC Symbol;Acc:HGNC:12513]
ENSG00000276043	UHRF1	426.1	1133.8	2693.5	1.41	1.25	ubiquitin like with PHD and ring finger domains 1 [Source:HGNC Symbol;Acc:HGNC:12556]
ENSG00000135763	URB2	234.4	429.4	885.1	0.87	1.04	URB2 ribosome biogenesis 2 homolog (S. cerevisiae) [Source:HGNC Symbol;Acc:HGNC:28967]
ENSG00000162607	USP1	1413.9	2784.8	4485.7	0.98	0.69	ubiquitin specific peptidase 1 [Source:HGNC Symbol;Acc:HGNC:12607]
ENSG00000120800	UTP20	407.3	711	1449.7	0.8	1.03	UTP20, small subunit processome component [Source:HGNC Symbol;Acc:HGNC:17897]
ENSG00000038427	VCAN	27717.1	68892.2	111842	1.31	0.7	versican [Source:HGNC Symbol;Acc:HGNC:2464]
ENSG00000160193	WDR4	125.1	237.7	485.1	0.93	1.03	WD repeat domain 4 [Source:HGNC Symbol;Acc:HGNC:12756]
ENSG00000075702	WDR62	438.2	735.7	1439.8	0.75	0.97	WD repeat domain 62 [Source:HGNC Symbol;Acc:HGNC:24502]
ENSG00000126215	XRCC3	350.4	581.8	1112	0.73	0.93	X-ray repair cross complementing 3 [Source:HGNC Symbol;Acc:HGNC:12830]
ENSG00000152422	XRCC4	751.2	1244.9	2066	0.73	0.73	X-ray repair cross complementing 4 [Source:HGNC Symbol;Acc:HGNC:12831]
ENSG00000132846	ZBED3	1021.9	1709.4	2814.3	0.74	0.72	zinc finger BED-type containing 3 [Source:HGNC Symbol;Acc:HGNC:20711]
ENSG00000187801	ZFP69B	67.6	126.1	218.9	0.9	0.8	ZFP69 zinc finger protein B [Source:HGNC Symbol;Acc:HGNC:28053]
ENSG00000165244	ZNF367	151.7	288	486.6	0.92	0.76	zinc finger protein 367 [Source:HGNC Symbol;Acc:HGNC:18320]
ENSG00000144792	ZNF660	165.1	273.2	491.7	0.73	0.85	zinc finger protein 660 [Source:HGNC Symbol;Acc:HGNC:26720]
ENSG00000179965	ZNF771	136.9	266.8	476.8	0.96	0.84	zinc finger protein 771 [Source:HGNC Symbol;Acc:HGNC:29653]
ENSG00000122952	ZWINT	537.4	1757.4	3441.5	1.71	0.97	ZW10 interacting kinetochore protein [Source:HGNC Symbol;Acc:HGNC:13195]
	GROUP 2
ENSG00000183044	ABAT	399.9	916.8	1333.7	1.2	0.54	4-aminobutyrate aminotransferase [Source:HGNC Symbol;Acc:HGNC:23]
ENSG00000144827	ABHD10	746.1	1320.3	1046.1	0.82	-0.34	abhydrolase domain containing 10 [Source:HGNC Symbol;Acc:HGNC:25656]
ENSG00000254893	AC113404.1	1668.6	4677.5	3553.5	1.49	-0.4	Ras-related protein Rap-1b-like protein [Source:UniProtKB/Swiss-Prot;Acc:A6NIZ1]
ENSG00000117054	ACADM	808.6	1843	2287.5	1.19	0.31	acyl-CoA dehydrogenase, C-4 to C-12 straight chain [Source:HGNC Symbol;Acc:HGNC:89]
ENSG00000136518	ACTL6A	1098.2	1855.1	2574.2	0.76	0.47	actin like 6A [Source:HGNC Symbol;Acc:HGNC:24124]
ENSG00000008277	ADAM22	260.5	552.5	807	1.09	0.55	ADAM metallopeptidase domain 22 [Source:HGNC Symbol;Acc:HGNC:201]
ENSG00000239900	ADSL	1461	2471.7	3051.9	0.76	0.3	adenylosuccinate lyase [Source:HGNC Symbol;Acc:HGNC:291]
ENSG00000155966	AFF2	226.2	2218	1485.2	3.3	-0.58	AF4/FMR2 family member 2 [Source:HGNC Symbol;Acc:HGNC:3776]
ENSG00000038002	AGA	342.5	667.6	1027.1	0.96	0.62	aspartylglucosaminidase [Source:HGNC Symbol;Acc:HGNC:318]
ENSG00000123505	AMD1	1996	3360	4252.2	0.75	0.34	adenosylmethionine decarboxylase 1 [Source:HGNC Symbol;Acc:HGNC:457]
ENSG00000135409	AMHR2	553.5	1358.8	1895	1.3	0.48	anti-Mullerian hormone receptor type 2 [Source:HGNC Symbol;Acc:HGNC:465]
ENSG00000101935	AMMECR1	684.4	1109.7	1570	0.7	0.5	Alport syndrome, mental retardation, midface hypoplasia and elliptocytosis chromosomal region gene 1 [Source:HGNC Symbol;Acc:HGNC:467]
ENSG00000196510	ANAPC7	716.5	1159.6	1597.8	0.69	0.46	anaphase promoting complex subunit 7 [Source:HGNC Symbol;Acc:HGNC:17380]
ENSG00000011426	ANLN	1888.7	3861.5	5239.8	1.03	0.44	anillin actin binding protein [Source:HGNC Symbol;Acc:HGNC:14082]
ENSG00000197043	ANXA6	2944.2	6789	4802.8	1.21	-0.5	annexin A6 [Source:HGNC Symbol;Acc:HGNC:544]
ENSG00000112379	ARFGEF3	4146.9	6802.3	4324.8	0.71	-0.65	ARFGEF family member 3 [Source:HGNC Symbol;Acc:HGNC:21213]
ENSG00000187951	ARHGAP11B	630.5	1119.2	1524.7	0.83	0.45	Rho GTPase activating protein 11B [Source:HGNC Symbol;Acc:HGNC:15782]
ENSG00000105676	ARMC6	584.5	980.3	1510.3	0.75	0.62	armadillo repeat containing 6 [Source:HGNC Symbol;Acc:HGNC:25049]
ENSG00000172379	ARNT2	1962.3	3206.8	4197.2	0.71	0.39	aryl hydrocarbon receptor nuclear translocator 2 [Source:HGNC Symbol;Acc:HGNC:16876]
ENSG00000111875	ASF1A	555.3	1031.1	1274.3	0.89	0.31	anti-silencing function 1A histone chaperone [Source:HGNC Symbol;Acc:HGNC:20995]
ENSG00000115966	ATF2	1673.2	3116.6	2605.8	0.9	-0.26	activating transcription factor 2 [Source:HGNC Symbol;Acc:HGNC:784]
ENSG00000169857	AVEN	162.5	307.1	433.1	0.92	0.5	apoptosis and caspase activation inhibitor [Source:HGNC Symbol;Acc:HGNC:13509]
ENSG00000118276	B4GALT6	1111.5	1944	1360.2	0.81	-0.52	beta-1,4-galactosyltransferase 6 [Source:HGNC Symbol;Acc:HGNC:929]
ENSG00000174684	B4GAT1	1431.5	2419	1787.8	0.76	-0.44	beta-1,4-glucuronyltransferase 1 [Source:HGNC Symbol;Acc:HGNC:15685]
ENSG00000137936	BCAR3	214.7	1299.8	2031.2	2.6	0.64	breast cancer anti-estrogen resistance 3 [Source:HGNC Symbol;Acc:HGNC:973]
ENSG00000107949	BCCIP	1187.1	2047.9	2797.8	0.79	0.45	BRCA2 and CDKN1A interacting protein [Source:HGNC Symbol;Acc:HGNC:978]
ENSG00000144857	BOC	283.8	574.4	350.7	1.02	-0.71	BOC cell adhesion associated, oncogene regulated [Source:HGNC Symbol;Acc:HGNC:17173]
ENSG00000012048	BRCA1	551.4	993.2	1548.2	0.85	0.64	BRCA1, DNA repair associated [Source:HGNC Symbol;Acc:HGNC:1100]
ENSG00000108561	C1QBP	1395.3	2567.1	3533.2	0.88	0.46	complement C1q binding protein [Source:HGNC Symbol;Acc:HGNC:1243]
ENSG00000253250	C8orf88	188.9	312.3	218.2	0.72	-0.52	chromosome 8 open reading frame 88 [Source:HGNC Symbol;Acc:HGNC:44672]
ENSG00000163006	CCDC138	271.8	612.2	808.7	1.17	0.4	coiled-coil domain containing 138 [Source:HGNC Symbol;Acc:HGNC:26531]
ENSG00000149548	CCDC15	82.8	138.5	213	0.74	0.62	coiled-coil domain containing 15 [Source:HGNC Symbol;Acc:HGNC:25798]
ENSG00000198624	CCDC69	326.2	547.1	387.7	0.75	-0.5	coiled-coil domain containing 69 [Source:HGNC Symbol;Acc:HGNC:24487]
ENSG00000091986	CCDC80	1856.9	3052.3	1926.5	0.72	-0.66	coiled-coil domain containing 80 [Source:HGNC Symbol;Acc:HGNC:30649]
ENSG00000150753	CCT5	4300.1	7568.6	10113.9	0.82	0.42	chaperonin containing TCP1 subunit 5 [Source:HGNC Symbol;Acc:HGNC:1618]
ENSG00000241399	CD302	328.8	1114.9	805.4	1.76	-0.47	CD302 molecule [Source:HGNC Symbol;Acc:HGNC:30843]
ENSG00000167775	CD320	943.6	1589.9	2548.8	0.75	0.68	CD320 molecule [Source:HGNC Symbol;Acc:HGNC:16692]
ENSG00000097046	CDC7	456.9	843.8	1255.9	0.88	0.57	cell division cycle 7 [Source:HGNC Symbol;Acc:HGNC:1745]
ENSG00000134371	CDC73	1367.6	2192.2	2644.6	0.68	0.27	cell division cycle 73 [Source:HGNC Symbol;Acc:HGNC:16783]
ENSG00000184661	CDCA2	445.5	955.2	1346.5	1.1	0.49	cell division cycle associated 2 [Source:HGNC Symbol;Acc:HGNC:14623]
ENSG00000111665	CDCA3	514.3	842.8	1195.8	0.71	0.5	cell division cycle associated 3 [Source:HGNC Symbol;Acc:HGNC:14624]
ENSG00000170779	CDCA4	578.5	1224.6	1888.5	1.08	0.62	cell division cycle associated 4 [Source:HGNC Symbol;Acc:HGNC:14625]
ENSG00000146670	CDCA5	864.1	1823.2	2665.7	1.08	0.55	cell division cycle associated 5 [Source:HGNC Symbol;Acc:HGNC:14626]
ENSG00000144354	CDCA7	250.8	1958	2983.9	2.96	0.61	cell division cycle associated 7 [Source:HGNC Symbol;Acc:HGNC:14628]
ENSG00000135446	CDK4	2958	5500.3	7588.1	0.9	0.46	cyclin dependent kinase 4 [Source:HGNC Symbol;Acc:HGNC:1773]
ENSG00000147889	CDKN2A	10	800.1	1199	6.35	0.58	cyclin dependent kinase inhibitor 2A [Source:HGNC Symbol;Acc:HGNC:1787]
ENSG00000138778	CENPE	1060.8	1952.2	3065.3	0.88	0.65	centromere protein E [Source:HGNC Symbol;Acc:HGNC:1856]
ENSG00000138092	CENPO	877	1734.6	2329.1	0.98	0.43	centromere protein O [Source:HGNC Symbol;Acc:HGNC:28152]
ENSG00000164323	CFAP97	1596	3086.3	2214.3	0.95	-0.48	cilia and flagella associated protein 97 [Source:HGNC Symbol;Acc:HGNC:29276]
ENSG00000149554	CHEK1	739.9	1393.5	2049.1	0.91	0.56	checkpoint kinase 1 [Source:HGNC Symbol;Acc:HGNC:1925]
ENSG00000169684	CHRNA5	130	323.8	468.4	1.32	0.53	cholinergic receptor nicotinic alpha 5 subunit [Source:HGNC Symbol;Acc:HGNC:1959]
ENSG00000136108	CKAP2	1693.9	2741.3	3661	0.69	0.42	cytoskeleton associated protein 2 [Source:HGNC Symbol;Acc:HGNC:1990]
ENSG00000164237	CMBL	787.2	1310.7	870.8	0.74	-0.59	carboxymethylenebutenolidase homolog [Source:HGNC Symbol;Acc:HGNC:25090]
ENSG00000100528	CNIH1	2614.5	4504.8	3397	0.78	-0.41	cornichon family AMPA receptor auxiliary protein 1 [Source:HGNC Symbol;Acc:HGNC:19431]
ENSG00000162377	COA7	324.2	730.7	1125.5	1.17	0.62	cytochrome c oxidase assembly factor 7 (putative) [Source:HGNC Symbol;Acc:HGNC:25716]
ENSG00000141030	COPS3	1029.1	1759	2457.5	0.77	0.48	COP9 signalosome subunit 3 [Source:HGNC Symbol;Acc:HGNC:2239]
ENSG00000088882	CPXM1	5996.6	18069.1	12556	1.59	-0.53	carboxypeptidase X, M14 family member 1 [Source:HGNC Symbol;Acc:HGNC:15771]
ENSG00000170275	CRTAP	2976	5517.9	3606.4	0.89	-0.61	cartilage associated protein [Source:HGNC Symbol;Acc:HGNC:2379]
ENSG00000124207	CSE1L	3175.9	5900.6	8477.2	0.89	0.52	chromosome segregation 1 like [Source:HGNC Symbol;Acc:HGNC:2431]
ENSG00000172115	CYCS	1026	1730.6	2419.5	0.76	0.48	cytochrome c, somatic [Source:HGNC Symbol;Acc:HGNC:19986]
ENSG00000006634	DBF4	435.7	912.9	1203.5	1.07	0.4	DBF4 zinc finger [Source:HGNC Symbol;Acc:HGNC:17364]
ENSG00000198924	DCLRE1A	363.6	588.4	945.3	0.69	0.68	DNA cross-link repair 1A [Source:HGNC Symbol;Acc:HGNC:17660]
ENSG00000118655	DCLRE1B	259.2	474.8	710.1	0.88	0.58	DNA cross-link repair 1B [Source:HGNC Symbol;Acc:HGNC:17641]
ENSG00000165490	DDIAS	150	353.3	554.3	1.24	0.65	DNA damage induced apoptosis suppressor [Source:HGNC Symbol;Acc:HGNC:26351]
ENSG00000138346	DNA2	535.9	1340.7	2055.1	1.32	0.62	DNA replication helicase/nuclease 2 [Source:HGNC Symbol;Acc:HGNC:2939]
ENSG00000176410	DNAJC30	110.5	186	292.4	0.75	0.65	DnaJ heat shock protein family (Hsp40) member C30 [Source:HGNC Symbol;Acc:HGNC:16410]
ENSG00000136048	DRAM1	592.2	1472.5	1859.3	1.31	0.34	DNA damage regulated autophagy modulator 1 [Source:HGNC Symbol;Acc:HGNC:25645]
ENSG00000139318	DUSP6	3154.9	18501.4	13795.6	2.55	-0.42	dual specificity phosphatase 6 [Source:HGNC Symbol;Acc:HGNC:3072]
ENSG00000128951	DUT	573.1	924.1	1278.2	0.69	0.47	deoxyuridine triphosphatase [Source:HGNC Symbol;Acc:HGNC:3078]
ENSG00000134874	DZIP1	1216.3	2361.4	1805.6	0.96	-0.39	DAZ interacting zinc finger protein 1 [Source:HGNC Symbol;Acc:HGNC:20908]
ENSG00000233057	EEF1A1P14	102.1	170.3	114.2	0.74	-0.58	eukaryotic translation elongation factor 1 alpha 1 pseudogene 14 [Source:HGNC Symbol;Acc:HGNC:3197]
ENSG00000163577	EIF5A2	77.5	159.6	103.5	1.04	-0.63	eukaryotic translation initiation factor 5A2 [Source:HGNC Symbol;Acc:HGNC:3301]
ENSG00000170522	ELOVL6	2315.9	4018.1	5988.9	0.79	0.58	ELOVL fatty acid elongase 6 [Source:HGNC Symbol;Acc:HGNC:15829]
ENSG00000074800	ENO1	51071.3	88819.7	59483.5	0.8	-0.58	enolase 1 [Source:HGNC Symbol;Acc:HGNC:3350]
ENSG00000135476	ESPL1	987.8	1751.7	2579.7	0.83	0.56	extra spindle pole bodies like 1, separase [Source:HGNC Symbol;Acc:HGNC:16856]
ENSG00000123737	EXOSC9	661.1	1103.9	1395.8	0.74	0.34	exosome component 9 [Source:HGNC Symbol;Acc:HGNC:9137]
ENSG00000149485	FADS1	5754.8	9980.1	13745.7	0.79	0.46	fatty acid desaturase 1 [Source:HGNC Symbol;Acc:HGNC:3574]
ENSG00000144554	FANCD2	1061.6	1745.1	2371.3	0.72	0.44	Fanconi anemia complementation group D2 [Source:HGNC Symbol;Acc:HGNC:3585]
ENSG00000145743	FBXL17	653.7	1044.4	818.3	0.68	-0.35	F-box and leucine rich repeat protein 17 [Source:HGNC Symbol;Acc:HGNC:13615]
ENSG00000164946	FREM1	1724.1	21214.7	13034.7	3.62	-0.7	FRAS1 related extracellular matrix 1 [Source:HGNC Symbol;Acc:HGNC:23399]
ENSG00000255883	FUNDC2P1	193.9	330.4	216.5	0.77	-0.61	FUN14 domain containing 2 pseudogene 1 [Source:HGNC Symbol;Acc:HGNC:17253]
ENSG00000165060	FXN	303	514.9	646.8	0.76	0.33	frataxin [Source:HGNC Symbol;Acc:HGNC:3951]
ENSG00000228232	GAPDHP1	126.5	229.5	151.2	0.86	-0.6	glyceraldehyde-3-phosphate dehydrogenase pseudogene 1 [Source:HGNC Symbol;Acc:HGNC:4159]
ENSG00000006007	GDE1	4395.3	8851.7	5526.2	1.01	-0.68	glycerophosphodiester phosphodiesterase 1 [Source:HGNC Symbol;Acc:HGNC:29644]
ENSG00000179409	GEMIN4	811.6	1322.1	1938	0.7	0.55	gem nuclear organelle associated protein 4 [Source:HGNC Symbol;Acc:HGNC:15717]
ENSG00000023572	GLRX2	82.9	162.1	255.7	0.97	0.65	glutaredoxin 2 [Source:HGNC Symbol;Acc:HGNC:16065]
ENSG00000172380	GNG12	1305	2232.2	1422.8	0.77	-0.65	G protein subunit gamma 12 [Source:HGNC Symbol;Acc:HGNC:19663]
ENSG00000158292	GPR153	605.1	1266.3	777.5	1.07	-0.7	G protein-coupled receptor 153 [Source:HGNC Symbol;Acc:HGNC:23618]
ENSG00000122034	GTF3A	1228.5	1998.6	2681.6	0.7	0.42	general transcription factor IIIA [Source:HGNC Symbol;Acc:HGNC:4662]
ENSG00000155115	GTF3C6	597.7	1103.7	1493.9	0.89	0.44	general transcription factor IIIC subunit 6 [Source:HGNC Symbol;Acc:HGNC:20872]
ENSG00000075218	GTSE1	775.5	1239.9	1736.9	0.68	0.49	G2 and S-phase expressed 1 [Source:HGNC Symbol;Acc:HGNC:13698]
ENSG00000105968	H2AFV	2906.7	5315.7	7425.5	0.87	0.48	H2A histone family member V [Source:HGNC Symbol;Acc:HGNC:20664]
ENSG00000128708	HAT1	587.5	1029.8	1407.1	0.81	0.45	histone acetyltransferase 1 [Source:HGNC Symbol;Acc:HGNC:4821]
ENSG00000167220	HDHD2	948.3	1612.2	1285.9	0.77	-0.33	haloacid dehalogenase like hydrolase domain containing 2 [Source:HGNC Symbol;Acc:HGNC:25364]
ENSG00000110422	HIPK3	1656	3130.4	3784.8	0.92	0.27	homeodomain interacting protein kinase 3 [Source:HGNC Symbol;Acc:HGNC:4915]
ENSG00000149929	HIRIP3	303.1	671.4	973.5	1.15	0.54	HIRA interacting protein 3 [Source:HGNC Symbol;Acc:HGNC:4917]
ENSG00000071794	HLTF	2694.7	4331.7	2837.9	0.68	-0.61	helicase like transcription factor [Source:HGNC Symbol;Acc:HGNC:11099]
ENSG00000189403	HMGB1	4062.7	8235.9	11782.9	1.02	0.52	high mobility group box 1 [Source:HGNC Symbol;Acc:HGNC:4983]
ENSG00000132967	HMGB1P5	3779.5	6797	9857.2	0.85	0.54	high mobility group box 1 pseudogene 5 [Source:HGNC Symbol;Acc:HGNC:4997]
ENSG00000113161	HMGCR	5552	10124	15673.7	0.87	0.63	3-hydroxy-3-methylglutaryl-CoA reductase [Source:HGNC Symbol;Acc:HGNC:5006]
ENSG00000138668	HNRNPD	7763.3	13117.2	18588	0.76	0.5	heterogeneous nuclear ribonucleoprotein D [Source:HGNC Symbol;Acc:HGNC:5036]
ENSG00000153976	HS3ST3A1	173.4	1545.4	951.8	3.15	-0.7	heparan sulfate-glucosamine 3-sulfotransferase 3A1 [Source:HGNC Symbol;Acc:HGNC:5196]
ENSG00000155304	HSPA13	2300.1	4307.5	3413.6	0.91	-0.34	heat shock protein family A (Hsp70) member 13 [Source:HGNC Symbol;Acc:HGNC:11375]
ENSG00000113013	HSPA9	5067.7	8852.9	11751.3	0.8	0.41	heat shock protein family A (Hsp70) member 9 [Source:HGNC Symbol;Acc:HGNC:5244]
ENSG00000226666	HSPA9P1	116.6	206.1	293	0.82	0.51	heat shock protein family A (Hsp70) member 9 pseudogene 1 [Source:HGNC Symbol;Acc:HGNC:24915]
ENSG00000076662	ICAM3	51.2	108	164.7	1.08	0.61	intercellular adhesion molecule 3 [Source:HGNC Symbol;Acc:HGNC:5346]
ENSG00000185201	IFITM2	2432.6	4074.2	2480.3	0.74	-0.72	interferon induced transmembrane protein 2 [Source:HGNC Symbol;Acc:HGNC:5413]
ENSG00000103742	IGDCC4	1231.1	2061.9	1509.6	0.74	-0.45	immunoglobulin superfamily DCC subclass member 4 [Source:HGNC Symbol;Acc:HGNC:13770]
ENSG00000144730	IL17RD	1400.5	2324.2	1824.8	0.73	-0.35	interleukin 17 receptor D [Source:HGNC Symbol;Acc:HGNC:17616]
ENSG00000186480	INSIG1	563.3	931.5	1443.3	0.73	0.63	insulin induced gene 1 [Source:HGNC Symbol;Acc:HGNC:6083]
ENSG00000151151	IPMK	884.5	1472.6	948.3	0.74	-0.64	inositol polyphosphate multikinase [Source:HGNC Symbol;Acc:HGNC:20739]
ENSG00000178202	KDELC2	987.4	2255.2	2779.9	1.19	0.3	KDEL motif containing 2 [Source:HGNC Symbol;Acc:HGNC:28496]
ENSG00000138160	KIF11	1586.5	3078.2	4367.4	0.96	0.5	kinesin family member 11 [Source:HGNC Symbol;Acc:HGNC:6388]
ENSG00000186185	KIF18B	713.2	1189.2	1882.6	0.74	0.66	kinesin family member 18B [Source:HGNC Symbol;Acc:HGNC:27102]
ENSG00000182481	KPNA2	4403	7911.8	10266.4	0.85	0.38	karyopherin subunit alpha 2 [Source:HGNC Symbol;Acc:HGNC:6395]
ENSG00000106003	LFNG	672	1161.9	1818	0.79	0.65	LFNG O-fucosylpeptide 3-beta-N-acetylglucosaminyltransferase [Source:HGNC Symbol;Acc:HGNC:6560]
ENSG00000105486	LIG1	1443.6	2347.9	3178.7	0.7	0.44	DNA ligase 1 [Source:HGNC Symbol;Acc:HGNC:6598]
ENSG00000169756	LIMS1	2332.1	4260.7	3412.6	0.87	-0.32	LIM zinc finger domain containing 1 [Source:HGNC Symbol;Acc:HGNC:6616]
ENSG00000165501	LRR1	250.2	533.8	668.9	1.09	0.33	leucine rich repeat protein 1 [Source:HGNC Symbol;Acc:HGNC:19742]
ENSG00000175061	LRRC75A-AS1	12644.3	20466.8	14732.5	0.69	-0.47	LRRC75A antisense RNA 1 [Source:HGNC Symbol;Acc:HGNC:28619]
ENSG00000133739	LRRCC1	241.3	402.3	570.7	0.74	0.5	leucine rich repeat and coiled-coil centrosomal protein 1 [Source:HGNC Symbol;Acc:HGNC:29373]
ENSG00000101367	MAPRE1	2697	4406.5	5681.3	0.71	0.37	microtubule associated protein RP/EB family member 1 [Source:HGNC Symbol;Acc:HGNC:6890]
ENSG00000247626	MARS2	217.9	355.1	517.2	0.7	0.54	methionyl-tRNA synthetase 2, mitochondrial [Source:HGNC Symbol;Acc:HGNC:25133]
ENSG00000131844	MCCC2	1424.1	2300.8	2941.5	0.69	0.35	methylcrotonoyl-CoA carboxylase 2 [Source:HGNC Symbol;Acc:HGNC:6937]
ENSG00000112118	MCM3	3714.2	6396.4	9840.4	0.78	0.62	minichromosome maintenance complex component 3 [Source:HGNC Symbol;Acc:HGNC:6945]
ENSG00000134138	MEIS2	2776.4	7447	9489.7	1.42	0.35	Meis homeobox 2 [Source:HGNC Symbol;Acc:HGNC:7001]
ENSG00000168282	MGAT2	762.9	1302.2	1719.5	0.77	0.4	mannosyl (alpha-1,6-)-glycoprotein beta-1,2-N-acetylglucosaminyltransferase [Source:HGNC Symbol;Acc:HGNC:7045]
ENSG00000148773	MKI67	3674.7	5927.4	9507.6	0.69	0.68	marker of proliferation Ki-67 [Source:HGNC Symbol;Acc:HGNC:7107]
ENSG00000132763	MMACHC	195.6	342.7	533.6	0.81	0.64	methylmalonic aciduria (cobalamin deficiency) cblC type, with homocystinuria [Source:HGNC Symbol;Acc:HGNC:24525]
ENSG00000156103	MMP16	833.5	12122.8	7877.3	3.86	-0.62	matrix metallopeptidase 16 [Source:HGNC Symbol;Acc:HGNC:7162]
ENSG00000051825	MPHOSPH9	659.8	1058.9	1484.6	0.68	0.49	M-phase phosphoprotein 9 [Source:HGNC Symbol;Acc:HGNC:7215]
ENSG00000066382	MPPED2	72.6	309.9	212.4	2.09	-0.54	metallophosphoesterase domain containing 2 [Source:HGNC Symbol;Acc:HGNC:1180]
ENSG00000137547	MRPL15	491.3	814.5	1126.8	0.73	0.47	mitochondrial ribosomal protein L15 [Source:HGNC Symbol;Acc:HGNC:14054]
ENSG00000053372	MRTO4	648.5	1103	1664.8	0.77	0.59	MRT4 homolog, ribosome maturation factor [Source:HGNC Symbol;Acc:HGNC:18477]
ENSG00000095002	MSH2	1400.2	2603.7	3686.4	0.9	0.5	mutS homolog 2 [Source:HGNC Symbol;Acc:HGNC:7325]
ENSG00000132780	NASP	6262.7	10858	17114.9	0.79	0.66	nuclear autoantigenic sperm protein [Source:HGNC Symbol;Acc:HGNC:7644]
ENSG00000121152	NCAPH	485.6	1184	1871	1.29	0.66	non-SMC condensin I complex subunit H [Source:HGNC Symbol;Acc:HGNC:1112]
ENSG00000266412	NCOA4	4952.3	8177.5	6812.2	0.72	-0.26	nuclear receptor coactivator 4 [Source:HGNC Symbol;Acc:HGNC:7671]
ENSG00000123545	NDUFAF4	178.7	286.2	373.6	0.68	0.38	NADH:ubiquinone oxidoreductase complex assembly factor 4 [Source:HGNC Symbol;Acc:HGNC:21034]
ENSG00000189362	NEMP2	223.1	459.5	605.2	1.05	0.4	nuclear envelope integral membrane protein 2 [Source:HGNC Symbol;Acc:HGNC:33700]
ENSG00000072736	NFATC3	980.6	1586.1	2113.5	0.69	0.41	nuclear factor of activated T-cells 3 [Source:HGNC Symbol;Acc:HGNC:7777]
ENSG00000130935	NOL11	1091.4	1766.9	2258.6	0.7	0.35	nucleolar protein 11 [Source:HGNC Symbol;Acc:HGNC:24557]
ENSG00000148200	NR6A1	3180.4	5992.2	7710.9	0.91	0.36	nuclear receptor subfamily 6 group A member 1 [Source:HGNC Symbol;Acc:HGNC:7985]
ENSG00000113569	NUP155	1190.4	2039.5	2752.9	0.78	0.43	nucleoporin 155 [Source:HGNC Symbol;Acc:HGNC:8063]
ENSG00000091651	ORC6	615.1	1083.9	1608.2	0.82	0.57	origin recognition complex subunit 6 [Source:HGNC Symbol;Acc:HGNC:17151]
ENSG00000083720	OXCT1	251.1	1081.6	1498.1	2.11	0.47	3-oxoacid CoA-transferase 1 [Source:HGNC Symbol;Acc:HGNC:8527]
ENSG00000111845	PAK1IP1	209.7	442.9	649.7	1.08	0.55	PAK1 interacting protein 1 [Source:HGNC Symbol;Acc:HGNC:20882]
ENSG00000173599	PC	511.2	1177.3	1773.1	1.2	0.59	pyruvate carboxylase [Source:HGNC Symbol;Acc:HGNC:8636]
ENSG00000142657	PGD	4224.4	6868.6	9258	0.7	0.43	phosphogluconate dehydrogenase [Source:HGNC Symbol;Acc:HGNC:8891]
ENSG00000087842	PIR	57.8	229.1	357.7	1.99	0.64	pirin [Source:HGNC Symbol;Acc:HGNC:30048]
ENSG00000171033	PKIA	363.9	847	1322.6	1.22	0.64	protein kinase (cAMP-dependent, catalytic) inhibitor alpha [Source:HGNC Symbol;Acc:HGNC:9017]
ENSG00000114805	PLCH1	450.6	929.2	1245.1	1.04	0.42	phospholipase C eta 1 [Source:HGNC Symbol;Acc:HGNC:29185]
ENSG00000143850	PLEKHA6	2702.2	4956.2	7148.1	0.88	0.53	pleckstrin homology domain containing A6 [Source:HGNC Symbol;Acc:HGNC:17053]
ENSG00000100979	PLTP	1153.9	2019.1	1445.6	0.81	-0.48	phospholipid transfer protein [Source:HGNC Symbol;Acc:HGNC:9093]
ENSG00000004399	PLXND1	4655.5	11515.5	7960	1.31	-0.53	plexin D1 [Source:HGNC Symbol;Acc:HGNC:9107]
ENSG00000115946	PNO1	261.2	429.2	635.2	0.72	0.57	partner of NOB1 homolog [Source:HGNC Symbol;Acc:HGNC:32790]
ENSG00000148229	POLE3	1040.2	1991.2	2804.7	0.94	0.49	DNA polymerase epsilon 3, accessory subunit [Source:HGNC Symbol;Acc:HGNC:13546]
ENSG00000051341	POLQ	410.3	684.7	945.7	0.74	0.46	DNA polymerase theta [Source:HGNC Symbol;Acc:HGNC:9186]
ENSG00000196262	PPIA	8273.4	13638.4	18553.6	0.72	0.44	peptidylprolyl isomerase A [Source:HGNC Symbol;Acc:HGNC:9253]
ENSG00000236334	PPIAL4G	582.8	964.1	1346.1	0.73	0.48	peptidylprolyl isomerase A like 4G [Source:HGNC Symbol;Acc:HGNC:33996]
ENSG00000251495	PPIAP11	913.3	1461	2056.1	0.68	0.49	peptidylprolyl isomerase A pseudogene 11 [Source:HGNC Symbol;Acc:HGNC:9263]
ENSG00000137168	PPIL1	619.1	1075.5	1689	0.8	0.65	peptidylprolyl isomerase like 1 [Source:HGNC Symbol;Acc:HGNC:9260]
ENSG00000186298	PPP1CC	6000.6	10662.4	7576.6	0.83	-0.49	protein phosphatase 1 catalytic subunit gamma [Source:HGNC Symbol;Acc:HGNC:9283]
ENSG00000131238	PPT1	2187.5	3754.3	4992.4	0.78	0.41	palmitoyl-protein thioesterase 1 [Source:HGNC Symbol;Acc:HGNC:9325]
ENSG00000198056	PRIM1	239.2	530.6	823.8	1.15	0.63	primase (DNA) subunit 1 [Source:HGNC Symbol;Acc:HGNC:9369]
ENSG00000100033	PRODH	281.5	555.8	398.9	0.98	-0.48	proline dehydrogenase 1 [Source:HGNC Symbol;Acc:HGNC:9453]
ENSG00000099256	PRTFDC1	222.2	366	557.4	0.72	0.61	phosphoribosyl transferase domain containing 1 [Source:HGNC Symbol;Acc:HGNC:23333]
ENSG00000131470	PSMC3IP	217.7	417.5	632	0.94	0.6	PSMC3 interacting protein [Source:HGNC Symbol;Acc:HGNC:17928]
ENSG00000183527	PSMG1	378.4	685.8	987.5	0.86	0.53	proteasome assembly chaperone 1 [Source:HGNC Symbol;Acc:HGNC:3043]
ENSG00000184489	PTP4A3	1594.4	2848.8	1805.5	0.84	-0.66	protein tyrosine phosphatase type IVA, member 3 [Source:HGNC Symbol;Acc:HGNC:9636]
ENSG00000171016	PYGO1	337.1	663.1	527.7	0.98	-0.33	pygopus family PHD finger 1 [Source:HGNC Symbol;Acc:HGNC:30256]
ENSG00000213339	QTRT1	485.3	931.6	1289.3	0.94	0.47	queuine tRNA-ribosyltransferase catalytic subunit 1 [Source:HGNC Symbol;Acc:HGNC:23797]
ENSG00000137502	RAB30	368.6	663.9	498.3	0.85	-0.41	RAB30, member RAS oncogene family [Source:HGNC Symbol;Acc:HGNC:9770]
ENSG00000127314	RAP1B	628.5	1642.7	1193.3	1.39	-0.46	RAP1B, member of RAS oncogene family [Source:HGNC Symbol;Acc:HGNC:9857]
ENSG00000244462	RBM12	1881.5	3514.5	5554.5	0.9	0.66	RNA binding motif protein 12 [Source:HGNC Symbol;Acc:HGNC:9898]
ENSG00000102317	RBM3	2421.8	4083.9	6332.6	0.75	0.63	RNA binding motif (RNP1, RRM) protein 3 [Source:HGNC Symbol;Acc:HGNC:9900]
ENSG00000133119	RFC3	342.5	906.7	1452	1.41	0.68	replication factor C subunit 3 [Source:HGNC Symbol;Acc:HGNC:9971]
ENSG00000163918	RFC4	650.1	1097.3	1565.2	0.76	0.51	replication factor C subunit 4 [Source:HGNC Symbol;Acc:HGNC:9972]
ENSG00000133111	RFXAP	149.5	318	505.5	1.09	0.67	regulatory factor X associated protein [Source:HGNC Symbol;Acc:HGNC:9988]
ENSG00000187994	RINL	146	284.7	174.8	0.96	-0.71	Ras and Rab interactor like [Source:HGNC Symbol;Acc:HGNC:24795]
ENSG00000178966	RMI1	368.4	733.4	1119.3	0.99	0.61	RecQ mediated genome instability 1 [Source:HGNC Symbol;Acc:HGNC:25764]
ENSG00000104889	RNASEH2A	575.2	1217.3	1777.6	1.08	0.55	ribonuclease H2 subunit A [Source:HGNC Symbol;Acc:HGNC:18518]
ENSG00000101695	RNF125	170	371	232.6	1.13	-0.67	ring finger protein 125 [Source:HGNC Symbol;Acc:HGNC:21150]
ENSG00000117748	RPA2	606.7	1239.3	1651.5	1.03	0.41	replication protein A2 [Source:HGNC Symbol;Acc:HGNC:10290]
ENSG00000233913	RPL10P9	7214.1	12608.5	8528.6	0.81	-0.56	ribosomal protein L10 pseudogene 9 [Source:HGNC Symbol;Acc:HGNC:35579]
ENSG00000167325	RRM1	2136.3	4282.6	5748.4	1	0.42	ribonucleotide reductase catalytic subunit M1 [Source:HGNC Symbol;Acc:HGNC:10451]
ENSG00000067533	RRP15	422.4	1007.8	1349.2	1.25	0.42	ribosomal RNA processing 15 homolog [Source:HGNC Symbol;Acc:HGNC:24255]
ENSG00000182010	RTKN2	400	1151.8	1604.5	1.53	0.48	rhotekin 2 [Source:HGNC Symbol;Acc:HGNC:19364]
ENSG00000168061	SAC3D1	303.5	553	830	0.87	0.59	SAC3 domain containing 1 [Source:HGNC Symbol;Acc:HGNC:30179]
ENSG00000164105	SAP30	240.5	430.9	613.4	0.84	0.51	Sin3A associated protein 30 [Source:HGNC Symbol;Acc:HGNC:10532]
ENSG00000100934	SEC23A	4708.4	7972.8	6070.8	0.76	-0.39	Sec23 homolog A, coat complex II component [Source:HGNC Symbol;Acc:HGNC:10701]
ENSG00000086475	SEPHS1	2518.7	4125	5497.1	0.71	0.41	selenophosphate synthetase 1 [Source:HGNC Symbol;Acc:HGNC:19685]
ENSG00000171241	SHCBP1	237.4	647.4	877.6	1.45	0.44	SHC binding and spindle associated 1 [Source:HGNC Symbol;Acc:HGNC:29547]
ENSG00000180730	SHISA2	482.4	10644.8	15013.5	4.46	0.5	shisa family member 2 [Source:HGNC Symbol;Acc:HGNC:20366]
ENSG00000154839	SKA1	273.6	737.5	1132.9	1.43	0.62	spindle and kinetochore associated complex subunit 1 [Source:HGNC Symbol;Acc:HGNC:28109]
ENSG00000182628	SKA2	827.8	2031.4	2730.4	1.3	0.43	spindle and kinetochore associated complex subunit 2 [Source:HGNC Symbol;Acc:HGNC:28006]
ENSG00000145604	SKP2	969.6	1821	2797.3	0.91	0.62	S-phase kinase associated protein 2 [Source:HGNC Symbol;Acc:HGNC:10901]
ENSG00000125520	SLC2A4RG	972.8	1714.5	2228.6	0.82	0.38	SLC2A4 regulator [Source:HGNC Symbol;Acc:HGNC:15930]
ENSG00000108055	SMC3	9873.6	17600.2	27340.4	0.83	0.64	structural maintenance of chromosomes 3 [Source:HGNC Symbol;Acc:HGNC:2468]
ENSG00000184602	SNN	2162.6	3590.3	5398.7	0.73	0.59	stannin [Source:HGNC Symbol;Acc:HGNC:11149]
ENSG00000167088	SNRPD1	958.7	1907.7	2925.2	0.99	0.62	small nuclear ribonucleoprotein D1 polypeptide [Source:HGNC Symbol;Acc:HGNC:11158]
ENSG00000110693	SOX6	1270.2	2314.2	3397.7	0.87	0.55	SRY-box 6 [Source:HGNC Symbol;Acc:HGNC:16421]
ENSG00000136158	SPRY2	6294	15736.6	20053.3	1.32	0.35	sprouty RTK signaling antagonist 2 [Source:HGNC Symbol;Acc:HGNC:11270]
ENSG00000145545	SRD5A1	581.6	933.3	1208.4	0.68	0.37	steroid 5 alpha-reductase 1 [Source:HGNC Symbol;Acc:HGNC:11284]
ENSG00000116649	SRM	601	1135.5	1788.4	0.92	0.66	spermidine synthase [Source:HGNC Symbol;Acc:HGNC:11296]
ENSG00000101955	SRPX	197.8	504.5	337.8	1.35	-0.58	sushi repeat containing protein, X-linked [Source:HGNC Symbol;Acc:HGNC:11309]
ENSG00000004866	ST7	238.3	412.3	585.1	0.79	0.51	suppression of tumorigenicity 7 [Source:HGNC Symbol;Acc:HGNC:11351]
ENSG00000117632	STMN1	7985.5	18432.6	27180	1.21	0.56	stathmin 1 [Source:HGNC Symbol;Acc:HGNC:6510]
ENSG00000152455	SUV39H2	427.3	928.2	1258.6	1.12	0.44	suppressor of variegation 3-9 homolog 2 [Source:HGNC Symbol;Acc:HGNC:17287]
ENSG00000198168	SVIP	920.8	2653.9	4199.1	1.53	0.66	small VCP interacting protein [Source:HGNC Symbol;Acc:HGNC:25238]
ENSG00000013810	TACC3	1705.2	2933.6	4255.1	0.78	0.54	transforming acidic coiled-coil containing protein 3 [Source:HGNC Symbol;Acc:HGNC:11524]
ENSG00000137492	THAP12	882.9	1629.3	1983.6	0.88	0.28	THAP domain containing 12 [Source:HGNC Symbol;Acc:HGNC:9440]
ENSG00000159445	THEM4	231	542.4	709.1	1.23	0.39	thioesterase superfamily member 4 [Source:HGNC Symbol;Acc:HGNC:17947]
ENSG00000111602	TIMELESS	2523.9	4410.4	6688.3	0.81	0.6	timeless circadian clock [Source:HGNC Symbol;Acc:HGNC:11813]
ENSG00000100575	TIMM9	478	772.8	563.6	0.69	-0.46	translocase of inner mitochondrial membrane 9 [Source:HGNC Symbol;Acc:HGNC:11819]
ENSG00000140332	TLE3	1558.6	3755.8	5336.1	1.27	0.51	transducin like enhancer of split 3 [Source:HGNC Symbol;Acc:HGNC:11839]
ENSG00000137210	TMEM14B	396.8	635.9	894.3	0.68	0.49	transmembrane protein 14B [Source:HGNC Symbol;Acc:HGNC:21384]
ENSG00000174695	TMEM167A	6411	11530.9	14391.5	0.85	0.32	transmembrane protein 167A [Source:HGNC Symbol;Acc:HGNC:28330]
ENSG00000146802	TMEM168	485.1	777.8	491.1	0.68	-0.66	transmembrane protein 168 [Source:HGNC Symbol;Acc:HGNC:25826]
ENSG00000155099	TMEM55A	825.7	1362.5	943.4	0.72	-0.53	transmembrane protein 55A [Source:HGNC Symbol;Acc:HGNC:25452]
ENSG00000109084	TMEM97	1462.8	3499.5	5159.1	1.26	0.56	transmembrane protein 97 [Source:HGNC Symbol;Acc:HGNC:28106]
ENSG00000071539	TRIP13	231.7	793.3	1072.3	1.78	0.44	thyroid hormone receptor interactor 13 [Source:HGNC Symbol;Acc:HGNC:12307]
ENSG00000174173	TRMT10C	428.6	695.8	896	0.7	0.37	tRNA methyltransferase 10C, mitochondrial RNase P subunit [Source:HGNC Symbol;Acc:HGNC:26022]
ENSG00000198860	TSEN15	282.9	575.7	806.8	1.03	0.49	tRNA splicing endonuclease subunit 15 [Source:HGNC Symbol;Acc:HGNC:16791]
ENSG00000113638	TTC33	822.8	1325.1	993.7	0.69	-0.42	tetratricopeptide repeat domain 33 [Source:HGNC Symbol;Acc:HGNC:29959]
ENSG00000198431	TXNRD1	2655.9	4626	7171	0.8	0.63	thioredoxin reductase 1 [Source:HGNC Symbol;Acc:HGNC:12437]
ENSG00000176890	TYMS	1578	4131.2	6073.3	1.39	0.56	thymidylate synthetase [Source:HGNC Symbol;Acc:HGNC:12441]
ENSG00000177889	UBE2N	1624.9	2698.2	3698.8	0.73	0.46	ubiquitin conjugating enzyme E2 N [Source:HGNC Symbol;Acc:HGNC:12492]
ENSG00000012963	UBR7	566.2	952.3	1367.1	0.75	0.52	ubiquitin protein ligase E3 component n-recognin 7 (putative) [Source:HGNC Symbol;Acc:HGNC:20344]
ENSG00000058056	USP13	448.6	936.6	1279.8	1.06	0.45	ubiquitin specific peptidase 13 (isopeptidase T-3) [Source:HGNC Symbol;Acc:HGNC:12611]
ENSG00000148429	USP6NL	1598.3	2737.5	3592.5	0.78	0.39	USP6 N-terminal like [Source:HGNC Symbol;Acc:HGNC:16858]
ENSG00000141076	UTP4	896.7	1563.6	2066.5	0.8	0.4	UTP4, small subunit processome component [Source:HGNC Symbol;Acc:HGNC:1983]
ENSG00000143494	VASH2	188.8	433.3	556.9	1.2	0.36	vasohibin 2 [Source:HGNC Symbol;Acc:HGNC:25723]
ENSG00000026025	VIM	27569.1	60611.9	41607.8	1.14	-0.54	vimentin [Source:HGNC Symbol;Acc:HGNC:12692]
ENSG00000092470	WDR76	164.1	432.3	672.2	1.4	0.64	WD repeat domain 76 [Source:HGNC Symbol;Acc:HGNC:25773]
ENSG00000126562	WNK4	604.2	1057.1	672.1	0.81	-0.65	WNK lysine deficient protein kinase 4 [Source:HGNC Symbol;Acc:HGNC:14544]
ENSG00000128245	YWHAH	1877.5	3054.1	4347.8	0.7	0.51	tyrosine 3-monooxygenase/tryptophan 5-monooxygenase activation protein eta [Source:HGNC Symbol;Acc:HGNC:12853]
ENSG00000105939	ZC3HAV1	1049.1	2057.4	2876.5	0.97	0.48	zinc finger CCCH-type containing, antiviral 1 [Source:HGNC Symbol;Acc:HGNC:23721]
ENSG00000196247	ZNF107	442.9	852.7	1090.9	0.95	0.36	zinc finger protein 107 [Source:HGNC Symbol;Acc:HGNC:12887]
ENSG00000156853	ZNF689	1062.7	1748.2	2098.6	0.72	0.26	zinc finger protein 689 [Source:HGNC Symbol;Acc:HGNC:25173]
ENSG00000196081	ZNF724	92.6	181.5	264.5	0.97	0.54	zinc finger protein 724 [Source:HGNC Symbol;Acc:HGNC:32460]
ENSG00000185869	ZNF829	75.4	134.5	201.3	0.84	0.58	zinc finger protein 829 [Source:HGNC Symbol;Acc:HGNC:34032]
	GROUP 3
ENSG00000167107	ACSF2	2858	1579.2	1107.9	-0.86	-0.51	acyl-CoA synthetase family member 2 [Source:HGNC Symbol;Acc:HGNC:26101]
ENSG00000151651	ADAM8	1941.6	260.2	158.5	-2.9	-0.71	ADAM metallopeptidase domain 8 [Source:HGNC Symbol;Acc:HGNC:215]
ENSG00000121281	ADCY7	1393.6	667.1	404.5	-1.06	-0.72	adenylate cyclase 7 [Source:HGNC Symbol;Acc:HGNC:238]
ENSG00000072071	ADGRL1	5369.3	2650.1	1988.8	-1.02	-0.41	adhesion G protein-coupled receptor L1 [Source:HGNC Symbol;Acc:HGNC:20973]
ENSG00000136383	ALPK3	11723.1	4913.6	5832.4	-1.25	0.25	alpha kinase 3 [Source:HGNC Symbol;Acc:HGNC:17574]
ENSG00000139211	AMIGO2	481.8	132.6	84.8	-1.86	-0.65	adhesion molecule with Ig like domain 2 [Source:HGNC Symbol;Acc:HGNC:24073]
ENSG00000164331	ANKRA2	1086.3	601.2	386.8	-0.85	-0.64	ankyrin repeat family A member 2 [Source:HGNC Symbol;Acc:HGNC:13208]
ENSG00000164236	ANKRD33B	773.1	411.9	280.5	-0.91	-0.55	ankyrin repeat domain 33B [Source:HGNC Symbol;Acc:HGNC:35240]
ENSG00000156381	ANKRD9	2626.3	1425.6	1075.6	-0.88	-0.41	ankyrin repeat domain 9 [Source:HGNC Symbol;Acc:HGNC:20096]
ENSG00000163516	ANKZF1	3011.7	1766.4	1162.8	-0.77	-0.6	ankyrin repeat and zinc finger domain containing 1 [Source:HGNC Symbol;Acc:HGNC:25527]
ENSG00000122359	ANXA11	5392.6	3224.3	2426.8	-0.74	-0.41	annexin A11 [Source:HGNC Symbol;Acc:HGNC:535]
ENSG00000143412	ANXA9	534	49	29.7	-3.44	-0.72	annexin A9 [Source:HGNC Symbol;Acc:HGNC:547]
ENSG00000089820	ARHGAP4	466.7	236.5	143.6	-0.98	-0.72	Rho GTPase activating protein 4 [Source:HGNC Symbol;Acc:HGNC:674]
ENSG00000130762	ARHGEF16	4162.2	873.6	660.4	-2.25	-0.4	Rho guanine nucleotide exchange factor 16 [Source:HGNC Symbol;Acc:HGNC:15515]
ENSG00000099889	ARVCF	2082.8	883.1	1260.3	-1.24	0.51	armadillo repeat gene deleted in velocardiofacial syndrome [Source:HGNC Symbol;Acc:HGNC:728]
ENSG00000104763	ASAH1	2950	1776.6	1295.2	-0.73	-0.46	N-acylsphingosine amidohydrolase 1 [Source:HGNC Symbol;Acc:HGNC:735]
ENSG00000162650	ATXN7L2	574.6	327	522.3	-0.81	0.68	ataxin 7 like 2 [Source:HGNC Symbol;Acc:HGNC:28713]
ENSG00000153094	BCL2L11	1164.3	661.7	971.3	-0.82	0.55	BCL2 like 11 [Source:HGNC Symbol;Acc:HGNC:994]
ENSG00000104081	BMF	8004	1695	1188.2	-2.24	-0.51	Bcl2 modifying factor [Source:HGNC Symbol;Acc:HGNC:24132]
ENSG00000167535	CACNB3	2867	1541.1	1186.2	-0.9	-0.38	calcium voltage-gated channel auxiliary subunit beta 3 [Source:HGNC Symbol;Acc:HGNC:1403]
ENSG00000012822	CALCOCO1	3871.3	1894.2	1254.1	-1.03	-0.59	calcium binding and coiled-coil domain 1 [Source:HGNC Symbol;Acc:HGNC:29306]
ENSG00000079691	CARMIL1	2108.6	1125.6	1586	-0.91	0.49	capping protein regulator and myosin 1 linker 1 [Source:HGNC Symbol;Acc:HGNC:21581]
ENSG00000130940	CASZ1	1010.3	140.5	85	-2.85	-0.73	castor zinc finger 1 [Source:HGNC Symbol;Acc:HGNC:26002]
ENSG00000105971	CAV2	403	227.6	136.7	-0.82	-0.73	caveolin 2 [Source:HGNC Symbol;Acc:HGNC:1528]
ENSG00000171219	CDC42BPG	2294.6	563	404.8	-2.03	-0.48	CDC42 binding protein kinase gamma [Source:HGNC Symbol;Acc:HGNC:29829]
ENSG00000163075	CFAP221	697.7	380.3	598.5	-0.88	0.65	cilia and flagella associated protein 221 [Source:HGNC Symbol;Acc:HGNC:33720]
ENSG00000184697	CLDN6	16533.7	4372.9	6550.1	-1.92	0.58	claudin 6 [Source:HGNC Symbol;Acc:HGNC:2048]
ENSG00000038532	CLEC16A	1591.7	796.1	1113.1	-1	0.48	C-type lectin domain family 16 member A [Source:HGNC Symbol;Acc:HGNC:29013]
ENSG00000182372	CLN8	1582.9	661.2	506.3	-1.26	-0.38	ceroid-lipofuscinosis, neuronal 8 [Source:HGNC Symbol;Acc:HGNC:2079]
ENSG00000183723	CMTM4	6232.9	3769.9	2934.1	-0.73	-0.36	CKLF like MARVEL transmembrane domain containing 4 [Source:HGNC Symbol;Acc:HGNC:19175]
ENSG00000204650	CRHR1-IT1	1399.6	770.9	518	-0.86	-0.57	CRHR1 intronic transcript 1 [Source:EntrezGene;Acc:147081]
ENSG00000103316	CRYM	411.6	212.6	134	-0.95	-0.67	crystallin mu [Source:HGNC Symbol;Acc:HGNC:2418]
ENSG00000104218	CSPP1	2765.2	1345.2	2107	-1.04	0.65	centrosome and spindle pole associated protein 1 [Source:HGNC Symbol;Acc:HGNC:26193]
ENSG00000168772	CXXC4	1517.4	460.1	326.7	-1.72	-0.5	CXXC finger protein 4 [Source:HGNC Symbol;Acc:HGNC:24593]
ENSG00000166347	CYB5A	2468.1	1263.8	948.2	-0.97	-0.41	cytochrome b5 type A [Source:HGNC Symbol;Acc:HGNC:2570]
ENSG00000051523	CYBA	3292.2	1756.1	1156.1	-0.91	-0.6	cytochrome b-245 alpha chain [Source:HGNC Symbol;Acc:HGNC:2577]
ENSG00000276644	DACH1	2784.7	1124.1	1657	-1.31	0.56	dachshund family transcription factor 1 [Source:HGNC Symbol;Acc:HGNC:2663]
ENSG00000179532	DNHD1	1048.1	454	282	-1.21	-0.69	dynein heavy chain domain 1 [Source:HGNC Symbol;Acc:HGNC:26532]
ENSG00000107554	DNMBP	2776	1599.6	1301.5	-0.8	-0.3	dynamin binding protein [Source:HGNC Symbol;Acc:HGNC:30373]
ENSG00000110042	DTX4	4014.6	1004.2	613.3	-2	-0.71	deltex E3 ubiquitin ligase 4 [Source:HGNC Symbol;Acc:HGNC:29151]
ENSG00000163412	EIF4E3	331.9	166.2	228.3	-1	0.46	eukaryotic translation initiation factor 4E family member 3 [Source:HGNC Symbol;Acc:HGNC:31837]
ENSG00000158711	ELK4	1736.9	1000.9	660.6	-0.8	-0.6	ELK4, ETS transcription factor [Source:HGNC Symbol;Acc:HGNC:3326]
ENSG00000132205	EMILIN2	435.5	101	61.6	-2.11	-0.71	elastin microfibril interfacer 2 [Source:HGNC Symbol;Acc:HGNC:19881]
ENSG00000167280	ENGASE	2192.6	925.6	626.5	-1.24	-0.56	endo-beta-N-acetylglucosaminidase [Source:HGNC Symbol;Acc:HGNC:24622]
ENSG00000099219	ERMP1	2932.9	1741.7	1058.9	-0.75	-0.72	endoplasmic reticulum metallopeptidase 1 [Source:HGNC Symbol;Acc:HGNC:23703]
ENSG00000072840	EVC	1531	914.2	1239.8	-0.74	0.44	EvC ciliary complex subunit 1 [Source:HGNC Symbol;Acc:HGNC:3497]
ENSG00000173040	EVC2	491.1	146.5	91.2	-1.75	-0.69	EvC ciliary complex subunit 2 [Source:HGNC Symbol;Acc:HGNC:19747]
ENSG00000142449	FBN3	4825.7	2315.3	1594.5	-1.06	-0.54	fibrillin 3 [Source:HGNC Symbol;Acc:HGNC:18794]
ENSG00000127084	FGD3	993.9	261.3	377	-1.93	0.53	FYVE, RhoGEF and PH domain containing 3 [Source:HGNC Symbol;Acc:HGNC:16027]
ENSG00000070404	FSTL3	1275.7	487.1	364.5	-1.39	-0.42	follistatin like 3 [Source:HGNC Symbol;Acc:HGNC:3973]
ENSG00000140564	FURIN	8479	2539.9	1705.1	-1.74	-0.57	furin, paired basic amino acid cleaving enzyme [Source:HGNC Symbol;Acc:HGNC:8568]
ENSG00000141012	GALNS	592.3	325.9	485.9	-0.86	0.58	galactosamine (N-acetyl)-6-sulfatase [Source:HGNC Symbol;Acc:HGNC:4122]
ENSG00000164574	GALNT10	1765.4	869.2	1108.8	-1.02	0.35	polypeptide N-acetylgalactosaminyltransferase 10 [Source:HGNC Symbol;Acc:HGNC:19873]
ENSG00000185340	GAS2L1	376.4	194.5	275.4	-0.95	0.5	growth arrest specific 2 like 1 [Source:HGNC Symbol;Acc:HGNC:16955]
ENSG00000130513	GDF15	3346.8	1771.7	1093.9	-0.92	-0.7	growth differentiation factor 15 [Source:HGNC Symbol;Acc:HGNC:30142]
ENSG00000166123	GPT2	3263.2	1558.9	2158.3	-1.07	0.47	glutamic--pyruvic transaminase 2 [Source:HGNC Symbol;Acc:HGNC:18062]
ENSG00000100429	HDAC10	156.5	90.7	61.2	-0.79	-0.57	histone deacetylase 10 [Source:HGNC Symbol;Acc:HGNC:18128]
ENSG00000010818	HIVEP2	1300	754	511.3	-0.79	-0.56	human immunodeficiency virus type I enhancer binding protein 2 [Source:HGNC Symbol;Acc:HGNC:4921]
ENSG00000003147	ICA1	1395.2	257.9	164	-2.44	-0.65	islet cell autoantigen 1 [Source:HGNC Symbol;Acc:HGNC:5343]
ENSG00000185436	IFNLR1	555.2	335.3	412	-0.73	0.3	interferon lambda receptor 1 [Source:HGNC Symbol;Acc:HGNC:18584]
ENSG00000138002	IFT172	836	459.5	726.9	-0.86	0.66	intraflagellar transport 172 [Source:HGNC Symbol;Acc:HGNC:30391]
ENSG00000115457	IGFBP2	19495.6	10135	6559.7	-0.94	-0.63	insulin like growth factor binding protein 2 [Source:HGNC Symbol;Acc:HGNC:5471]
ENSG00000269335	IKBKG	812.3	476.8	627.4	-0.77	0.4	inhibitor of kappa light polypeptide gene enhancer in B-cells, kinase gamma [Source:HGNC Symbol;Acc:HGNC:5961]
ENSG00000144711	IQSEC1	1976.2	1117.4	808	-0.82	-0.47	IQ motif and Sec7 domain 1 [Source:HGNC Symbol;Acc:HGNC:29112]
ENSG00000135424	ITGA7	830.6	163.4	109.5	-2.35	-0.58	integrin subunit alpha 7 [Source:HGNC Symbol;Acc:HGNC:6143]
ENSG00000137171	KLC4	2029.7	847.9	603.7	-1.26	-0.49	kinesin light chain 4 [Source:HGNC Symbol;Acc:HGNC:21624]
ENSG00000119138	KLF9	569.8	146.5	91.1	-1.96	-0.68	Kruppel like factor 9 [Source:HGNC Symbol;Acc:HGNC:1123]
ENSG00000109790	KLHL5	4070.6	2022.5	1682.6	-1.01	-0.27	kelch like family member 5 [Source:HGNC Symbol;Acc:HGNC:6356]
ENSG00000135338	LCA5	636.2	354.8	220.8	-0.84	-0.69	LCA5, lebercilin [Source:HGNC Symbol;Acc:HGNC:31923]
ENSG00000224081	LINC01057	861.5	311.8	214.1	-1.47	-0.54	long intergenic non-protein coding RNA 1057 [Source:HGNC Symbol;Acc:HGNC:49057]
ENSG00000228794	LINC01128	457.6	253.4	331.4	-0.85	0.39	long intergenic non-protein coding RNA 1128 [Source:HGNC Symbol;Acc:HGNC:49377]
ENSG00000073350	LLGL2	7786.6	3139.4	2510.3	-1.31	-0.32	LLGL2, scribble cell polarity complex component [Source:HGNC Symbol;Acc:HGNC:6629]
ENSG00000176454	LPCAT4	3360	1880.7	1410.3	-0.84	-0.42	lysophosphatidylcholine acyltransferase 4 [Source:HGNC Symbol;Acc:HGNC:30059]
ENSG00000127603	MACF1	11309.9	6454.7	9492.3	-0.81	0.56	microtubule-actin crosslinking factor 1 [Source:HGNC Symbol;Acc:HGNC:13664]
ENSG00000198517	MAFK	2529.2	644.5	438.3	-1.97	-0.55	MAF bZIP transcription factor K [Source:HGNC Symbol;Acc:HGNC:6782]
ENSG00000198934	MAGEE1	508.8	268.3	177.2	-0.92	-0.6	MAGE family member E1 [Source:HGNC Symbol;Acc:HGNC:24934]
ENSG00000139793	MBNL2	2755.9	1294.9	860.3	-1.09	-0.59	muscleblind like splicing regulator 2 [Source:HGNC Symbol;Acc:HGNC:16746]
ENSG00000067365	METTL22	1961	783.7	545.3	-1.32	-0.52	methyltransferase like 22 [Source:HGNC Symbol;Acc:HGNC:28368]
ENSG00000157227	MMP14	23004	13733.1	9832.1	-0.74	-0.48	matrix metallopeptidase 14 [Source:HGNC Symbol;Acc:HGNC:7160]
ENSG00000133131	MORC4	908.2	490.9	316.1	-0.89	-0.63	MORC family CW-type zinc finger 4 [Source:HGNC Symbol;Acc:HGNC:23485]
ENSG00000170873	MTSS1	1562.7	672	427.4	-1.22	-0.65	MTSS1, I-BAR domain containing [Source:HGNC Symbol;Acc:HGNC:20443]
ENSG00000059728	MXD1	887.6	451.8	291.3	-0.97	-0.63	MAX dimerization protein 1 [Source:HGNC Symbol;Acc:HGNC:6761]
ENSG00000172936	MYD88	941	428.1	260.4	-1.14	-0.72	myeloid differentiation primary response 88 [Source:HGNC Symbol;Acc:HGNC:7562]
ENSG00000167306	MYO5B	2211.3	352.1	215.2	-2.65	-0.71	myosin VB [Source:HGNC Symbol;Acc:HGNC:7603]
ENSG00000274180	NATD1	1238.1	558.5	348.9	-1.15	-0.68	N-acetyltransferase domain containing 1 [Source:HGNC Symbol;Acc:HGNC:30770]
ENSG00000134369	NAV1	2311.4	927	1361.3	-1.32	0.55	neuron navigator 1 [Source:HGNC Symbol;Acc:HGNC:15989]
ENSG00000160796	NBEAL2	10012.8	2350	3158.3	-2.09	0.43	neurobeachin like 2 [Source:HGNC Symbol;Acc:HGNC:31928]
ENSG00000273136	NBPF26	999.2	546.3	426.4	-0.87	-0.36	neuroblastoma breakpoint family member 26 [Source:HGNC Symbol;Acc:HGNC:49571]
ENSG00000165795	NDRG2	2004.9	1065.3	699.3	-0.91	-0.61	NDRG family member 2 [Source:HGNC Symbol;Acc:HGNC:14460]
ENSG00000140398	NEIL1	974.6	260.1	162.8	-1.91	-0.68	nei like DNA glycosylase 1 [Source:HGNC Symbol;Acc:HGNC:18448]
ENSG00000170322	NFRKB	2922.9	1549	2241.8	-0.92	0.53	nuclear factor related to kappaB binding protein [Source:HGNC Symbol;Acc:HGNC:7802]
ENSG00000151014	NOCT	411.8	211.1	291.5	-0.96	0.47	nocturnin [Source:HGNC Symbol;Acc:HGNC:14254]
ENSG00000134250	NOTCH2	15770	7134.8	5053.3	-1.14	-0.5	notch 2 [Source:HGNC Symbol;Acc:HGNC:7882]
ENSG00000215440	NPEPL1	1282.6	484.8	291.2	-1.4	-0.73	aminopeptidase-like 1 [Source:HGNC Symbol;Acc:HGNC:16244]
ENSG00000135124	P2RX4	1740.5	932.4	676.4	-0.9	-0.46	purinergic receptor P2X 4 [Source:HGNC Symbol;Acc:HGNC:8535]
ENSG00000132849	PATJ	3641.4	1606.4	994.3	-1.18	-0.69	PATJ, crumbs cell polarity complex component [Source:HGNC Symbol;Acc:HGNC:28881]
ENSG00000273344	PAXIP1-AS1	328.9	176.1	110.5	-0.9	-0.66	PAXIP1 antisense RNA 1 (head to head) [Source:HGNC Symbol;Acc:HGNC:27328]
ENSG00000177839	PCDHB9	248.1	141.6	94.7	-0.81	-0.59	protocadherin beta 9 [Source:HGNC Symbol;Acc:HGNC:8694]
ENSG00000160613	PCSK7	1364.3	800.9	1054.4	-0.77	0.4	proprotein convertase subtilisin/kexin type 7 [Source:HGNC Symbol;Acc:HGNC:8748]
ENSG00000172572	PDE3A	4645.3	1647	2369.8	-1.5	0.52	phosphodiesterase 3A [Source:HGNC Symbol;Acc:HGNC:8778]
ENSG00000142102	PGGHG	11023.9	6230.8	4393	-0.82	-0.5	protein-glucosylgalactosylhydroxylysine glucosidase [Source:HGNC Symbol;Acc:HGNC:26210]
ENSG00000171608	PIK3CD	987.5	441	283.8	-1.16	-0.64	phosphatidylinositol-4,5-bisphosphate 3-kinase catalytic subunit delta [Source:HGNC Symbol;Acc:HGNC:8977]
ENSG00000164050	PLXNB1	15052.5	6940.4	10824	-1.12	0.64	plexin B1 [Source:HGNC Symbol;Acc:HGNC:9103]
ENSG00000186866	POFUT2	4794.1	2714.2	2088.5	-0.82	-0.38	protein O-fucosyltransferase 2 [Source:HGNC Symbol;Acc:HGNC:14683]
ENSG00000118898	PPL	5045.8	990	611.9	-2.35	-0.69	periplakin [Source:HGNC Symbol;Acc:HGNC:9273]
ENSG00000104881	PPP1R13L	1532.6	393.8	251	-1.96	-0.65	protein phosphatase 1 regulatory subunit 13 like [Source:HGNC Symbol;Acc:HGNC:18838]
ENSG00000106617	PRKAG2	351.1	208.4	268.3	-0.75	0.37	protein kinase AMP-activated non-catalytic subunit gamma 2 [Source:HGNC Symbol;Acc:HGNC:9386]
ENSG00000188191	PRKAR1B	1033.4	503.4	329.8	-1.04	-0.61	protein kinase cAMP-dependent type I regulatory subunit beta [Source:HGNC Symbol;Acc:HGNC:9390]
ENSG00000067606	PRKCZ	1865.6	1067.3	708.5	-0.81	-0.59	protein kinase C zeta [Source:HGNC Symbol;Acc:HGNC:9412]
ENSG00000173482	PTPRM	2139.7	784.9	536.4	-1.45	-0.55	protein tyrosine phosphatase, receptor type M [Source:HGNC Symbol;Acc:HGNC:9675]
ENSG00000156675	RAB11FIP1	5817.4	2646.8	1780	-1.14	-0.57	RAB11 family interacting protein 1 [Source:HGNC Symbol;Acc:HGNC:30265]
ENSG00000139998	RAB15	933.8	531.1	824.9	-0.81	0.64	RAB15, member RAS oncogene family [Source:HGNC Symbol;Acc:HGNC:20150]
ENSG00000105514	RAB3D	1268	742.9	592.4	-0.77	-0.33	RAB3D, member RAS oncogene family [Source:HGNC Symbol;Acc:HGNC:9779]
ENSG00000177548	RABEP2	731.9	385	590.9	-0.93	0.62	rabaptin, RAB GTPase binding effector protein 2 [Source:HGNC Symbol;Acc:HGNC:24817]
ENSG00000136828	RALGPS1	1703.3	439.4	302.5	-1.95	-0.54	Ral GEF with PH domain and SH3 binding motif 1 [Source:HGNC Symbol;Acc:HGNC:16851]
ENSG00000076864	RAP1GAP	2893.1	1330.6	999.2	-1.12	-0.41	RAP1 GTPase activating protein [Source:HGNC Symbol;Acc:HGNC:9858]
ENSG00000076067	RBMS2	3895.6	1608.5	1166.1	-1.28	-0.46	RNA binding motif single stranded interacting protein 2 [Source:HGNC Symbol;Acc:HGNC:9909]
ENSG00000117602	RCAN3	1906	1140.4	757.4	-0.74	-0.59	RCAN family member 3 [Source:HGNC Symbol;Acc:HGNC:3042]
ENSG00000205517	RGL3	4506.2	917.3	645.4	-2.3	-0.51	ral guanine nucleotide dissociation stimulator like 3 [Source:HGNC Symbol;Acc:HGNC:30282]
ENSG00000183421	RIPK4	2502.5	1367.8	1015.2	-0.87	-0.43	receptor interacting serine/threonine kinase 4 [Source:HGNC Symbol;Acc:HGNC:496]
ENSG00000034677	RNF19A	1776.2	1056.6	778.5	-0.75	-0.44	ring finger protein 19A, RBR E3 ubiquitin protein ligase [Source:HGNC Symbol;Acc:HGNC:13432]
ENSG00000108375	RNF43	762.8	438.6	341.8	-0.8	-0.36	ring finger protein 43 [Source:HGNC Symbol;Acc:HGNC:18505]
ENSG00000069667	RORA	519	269.3	167.4	-0.95	-0.69	RAR related orphan receptor A [Source:HGNC Symbol;Acc:HGNC:10258]
ENSG00000269609	RPARP-AS1	464.2	183	124.6	-1.34	-0.56	RPARP antisense RNA 1 [Source:HGNC Symbol;Acc:HGNC:45238]
ENSG00000117616	RSRP1	2201.8	1159.2	714.9	-0.93	-0.7	arginine and serine rich protein 1 [Source:HGNC Symbol;Acc:HGNC:25234]
ENSG00000197956	S100A6	5288.2	2053.1	1495.1	-1.36	-0.46	S100 calcium binding protein A6 [Source:HGNC Symbol;Acc:HGNC:10496]
ENSG00000198794	SCAMP5	2210.9	678.9	873.5	-1.7	0.36	secretory carrier membrane protein 5 [Source:HGNC Symbol;Acc:HGNC:30386]
ENSG00000124145	SDC4	12197.6	6145.3	4026.2	-0.99	-0.61	syndecan 4 [Source:HGNC Symbol;Acc:HGNC:10661]
ENSG00000001617	SEMA3F	1418.8	457.5	327.8	-1.63	-0.48	semaphorin 3F [Source:HGNC Symbol;Acc:HGNC:10728]
ENSG00000187764	SEMA4D	1820.2	1093.5	828.4	-0.73	-0.4	semaphorin 4D [Source:HGNC Symbol;Acc:HGNC:10732]
ENSG00000120057	SFRP5	8724.6	2108.8	1314.7	-2.05	-0.68	secreted frizzled related protein 5 [Source:HGNC Symbol;Acc:HGNC:10779]
ENSG00000187531	SIRT7	585.4	300.1	426.9	-0.96	0.51	sirtuin 7 [Source:HGNC Symbol;Acc:HGNC:14935]
ENSG00000140199	SLC12A6	1894.6	1117.4	868	-0.76	-0.37	solute carrier family 12 member 6 [Source:HGNC Symbol;Acc:HGNC:10914]
ENSG00000174327	SLC16A13	305	158.7	254.6	-0.94	0.68	solute carrier family 16 member 13 [Source:HGNC Symbol;Acc:HGNC:31037]
ENSG00000197375	SLC22A5	1265.4	430.4	280	-1.56	-0.62	solute carrier family 22 member 5 [Source:HGNC Symbol;Acc:HGNC:10969]
ENSG00000197119	SLC25A29	6599.8	2490.7	3330.9	-1.41	0.42	solute carrier family 25 member 29 [Source:HGNC Symbol;Acc:HGNC:20116]
ENSG00000080493	SLC4A4	13647.7	3763.8	5529.3	-1.86	0.55	solute carrier family 4 member 4 [Source:HGNC Symbol;Acc:HGNC:11030]
ENSG00000130821	SLC6A8	2442.4	1414.6	950.6	-0.79	-0.57	solute carrier family 6 member 8 [Source:HGNC Symbol;Acc:HGNC:11055]
ENSG00000089060	SLC8B1	706.6	280.5	198.8	-1.33	-0.49	solute carrier family 8 member B1 [Source:HGNC Symbol;Acc:HGNC:26175]
ENSG00000065923	SLC9A7	1141.3	475.4	314.1	-1.26	-0.6	solute carrier family 9 member A7 [Source:HGNC Symbol;Acc:HGNC:17123]
ENSG00000166949	SMAD3	4660.2	2016.3	1558.9	-1.21	-0.37	SMAD family member 3 [Source:HGNC Symbol;Acc:HGNC:6769]
ENSG00000120693	SMAD9	2125.2	918.2	559.7	-1.21	-0.71	SMAD family member 9 [Source:HGNC Symbol;Acc:HGNC:6774]
ENSG00000105771	SMG9	1469.5	882.3	1137	-0.74	0.37	SMG9, nonsense mediated mRNA decay factor [Source:HGNC Symbol;Acc:HGNC:25763]
ENSG00000144451	SPAG16	1047.3	569.3	441	-0.88	-0.37	sperm associated antigen 16 [Source:HGNC Symbol;Acc:HGNC:23225]
ENSG00000144228	SPOPL	2196.4	1265	916.6	-0.8	-0.47	speckle type BTB/POZ protein like [Source:HGNC Symbol;Acc:HGNC:27934]
ENSG00000173898	SPTBN2	1786.8	812.8	1233.1	-1.14	0.6	spectrin beta, non-erythrocytic 2 [Source:HGNC Symbol;Acc:HGNC:11276]
ENSG00000242294	STAG3L5P	404.8	228.1	351.9	-0.83	0.63	stromal antigen 3-like 5 pseudogene [Source:HGNC Symbol;Acc:HGNC:48896]
ENSG00000214530	STARD10	6433.3	3793.4	2420.9	-0.76	-0.65	StAR related lipid transfer domain containing 10 [Source:HGNC Symbol;Acc:HGNC:10666]
ENSG00000163482	STK36	2390.9	1007.8	1541.7	-1.25	0.61	serine/threonine kinase 36 [Source:HGNC Symbol;Acc:HGNC:17209]
ENSG00000076944	STXBP2	1393.7	691.1	550.3	-1.01	-0.33	syntaxin binding protein 2 [Source:HGNC Symbol;Acc:HGNC:11445]
ENSG00000097096	SYDE2	626.3	192.9	283.7	-1.7	0.56	synapse defective Rho GTPase homolog 2 [Source:HGNC Symbol;Acc:HGNC:25841]
ENSG00000100321	SYNGR1	4196	2483.1	1528.5	-0.76	-0.7	synaptogyrin 1 [Source:HGNC Symbol;Acc:HGNC:11498]
ENSG00000158710	TAGLN2	7973	3835	2354.7	-1.06	-0.7	transgelin 2 [Source:HGNC Symbol;Acc:HGNC:11554]
ENSG00000183597	TANGO2	367.9	188.4	255.5	-0.97	0.44	transport and golgi organization 2 homolog [Source:HGNC Symbol;Acc:HGNC:25439]
ENSG00000110719	TCIRG1	3890.4	1477.5	941.8	-1.4	-0.65	T-cell immune regulator 1, ATPase H+ transporting V0 subunit a3 [Source:HGNC Symbol;Acc:HGNC:11647]
ENSG00000167302	TEPSIN	786.5	455.3	653.8	-0.79	0.52	TEPSIN, adaptor related protein complex 4 accessory protein [Source:HGNC Symbol;Acc:HGNC:26458]
ENSG00000072274	TFRC	13599.9	6821.1	4806.1	-1	-0.51	transferrin receptor [Source:HGNC Symbol;Acc:HGNC:11763]
ENSG00000105329	TGFB1	4609.6	1948.6	1191.9	-1.24	-0.71	transforming growth factor beta 1 [Source:HGNC Symbol;Acc:HGNC:11766]
ENSG00000127666	TICAM1	386	158.9	110.5	-1.28	-0.52	toll like receptor adaptor molecule 1 [Source:HGNC Symbol;Acc:HGNC:18348]
ENSG00000163659	TIPARP	1697.8	971.3	678.2	-0.81	-0.52	TCDD inducible poly(ADP-ribose) polymerase [Source:HGNC Symbol;Acc:HGNC:23696]
ENSG00000162542	TMCO4	387.3	140.6	87.8	-1.46	-0.68	transmembrane and coiled-coil domains 4 [Source:HGNC Symbol;Acc:HGNC:27393]
ENSG00000181284	TMEM102	446.8	257	184.3	-0.8	-0.48	transmembrane protein 102 [Source:HGNC Symbol;Acc:HGNC:26722]
ENSG00000152078	TMEM56	1886.2	974.1	646.1	-0.95	-0.59	transmembrane protein 56 [Source:HGNC Symbol;Acc:HGNC:26477]
ENSG00000116857	TMEM9	5640.7	3217.5	2488.7	-0.81	-0.37	transmembrane protein 9 [Source:HGNC Symbol;Acc:HGNC:18823]
ENSG00000078804	TP53INP2	1151.6	478.7	731.7	-1.27	0.61	tumor protein p53 inducible nuclear protein 2 [Source:HGNC Symbol;Acc:HGNC:16104]
ENSG00000112343	TRIM38	1373.6	668.7	457.2	-1.04	-0.55	tripartite motif containing 38 [Source:HGNC Symbol;Acc:HGNC:10059]
ENSG00000166436	TRIM66	457.3	223.2	348.4	-1.04	0.64	tripartite motif containing 66 [Source:HGNC Symbol;Acc:HGNC:29005]
ENSG00000167333	TRIM68	805.7	302.1	188.1	-1.42	-0.68	tripartite motif containing 68 [Source:HGNC Symbol;Acc:HGNC:21161]
ENSG00000087077	TRIP6	2743.4	1499.7	1139.3	-0.87	-0.4	thyroid hormone receptor interactor 6 [Source:HGNC Symbol;Acc:HGNC:12311]
ENSG00000121297	TSHZ3	514.5	310.7	431.1	-0.73	0.47	teashirt zinc finger homeobox 3 [Source:HGNC Symbol;Acc:HGNC:30700]
ENSG00000099282	TSPAN15	968.1	477.5	342.4	-1.02	-0.48	tetraspanin 15 [Source:HGNC Symbol;Acc:HGNC:23298]
ENSG00000005379	TSPOAP1	1552.9	546.3	371.5	-1.51	-0.56	TSPO associated protein 1 [Source:HGNC Symbol;Acc:HGNC:16831]
ENSG00000133985	TTC9	574.7	304.3	417.4	-0.92	0.46	tetratricopeptide repeat domain 9 [Source:HGNC Symbol;Acc:HGNC:20267]
ENSG00000173218	VANGL1	1104.4	650.9	1007.9	-0.76	0.63	VANGL planar cell polarity protein 1 [Source:HGNC Symbol;Acc:HGNC:15512]
ENSG00000171044	XKR6	197.1	105.9	70.4	-0.9	-0.6	XK related 6 [Source:HGNC Symbol;Acc:HGNC:27806]
ENSG00000130733	YIPF2	3346.8	1944.7	1307.2	-0.78	-0.57	Yip1 domain family member 2 [Source:HGNC Symbol;Acc:HGNC:28476]
ENSG00000175155	YPEL2	2849.8	955	630.8	-1.58	-0.6	yippee like 2 [Source:HGNC Symbol;Acc:HGNC:18326]
ENSG00000090238	YPEL3	1352	496.2	316	-1.45	-0.65	yippee like 3 [Source:HGNC Symbol;Acc:HGNC:18327]
ENSG00000175048	ZDHHC14	348.7	170.5	260.7	-1.03	0.61	zinc finger DHHC-type containing 14 [Source:HGNC Symbol;Acc:HGNC:20341]
ENSG00000174586	ZNF497	207.2	115.4	183	-0.85	0.67	zinc finger protein 497 [Source:HGNC Symbol;Acc:HGNC:23714]
ENSG00000188171	ZNF626	597.1	300.6	443.2	-0.99	0.56	zinc finger protein 626 [Source:HGNC Symbol;Acc:HGNC:30461]
ENSG00000151612	ZNF827	1458.9	848.3	622.9	-0.78	-0.45	zinc finger protein 827 [Source:HGNC Symbol;Acc:HGNC:27193]
ENSG00000106479	ZNF862	1094.3	644.5	459.7	-0.76	-0.49	zinc finger protein 862 [Source:HGNC Symbol;Acc:HGNC:34519]
	GROUP 4
ENSG00000107331	ABCA2	6641.5	3838.2	1570.8	-0.79	-1.29	ATP binding cassette subfamily A member 2 [Source:HGNC Symbol;Acc:HGNC:32]
ENSG00000108846	ABCC3	207.2	46.6	12.6	-2.15	-1.87	ATP binding cassette subfamily C member 3 [Source:HGNC Symbol;Acc:HGNC:54]
ENSG00000114626	ABTB1	709.9	271	149.7	-1.39	-0.86	ankyrin repeat and BTB domain containing 1 [Source:HGNC Symbol;Acc:HGNC:18275]
ENSG00000181513	ACBD4	702.9	370.1	211.8	-0.93	-0.8	acyl-CoA binding domain containing 4 [Source:HGNC Symbol;Acc:HGNC:23337]
ENSG00000110455	ACCS	505.3	146.2	53.6	-1.79	-1.44	1-aminocyclopropane-1-carboxylate synthase homolog (inactive) [Source:HGNC Symbol;Acc:HGNC:23989]
ENSG00000102575	ACP5	249.8	42.1	10.8	-2.57	-1.94	acid phosphatase 5, tartrate resistant [Source:HGNC Symbol;Acc:HGNC:124]
ENSG00000049192	ADAMTS6	349.6	54.5	18.1	-2.68	-1.57	ADAM metallopeptidase with thrombospondin type 1 motif 6 [Source:HGNC Symbol;Acc:HGNC:222]
ENSG00000121753	ADGRB2	970.1	569.8	296	-0.77	-0.95	adhesion G protein-coupled receptor B2 [Source:HGNC Symbol;Acc:HGNC:944]
ENSG00000164393	ADGRF2	1127	52.3	17.7	-4.43	-1.6	adhesion G protein-coupled receptor F2 [Source:HGNC Symbol;Acc:HGNC:18991]
ENSG00000153294	ADGRF4	736	36.9	8.1	-4.32	-2.21	adhesion G protein-coupled receptor F4 [Source:HGNC Symbol;Acc:HGNC:19011]
ENSG00000205336	ADGRG1	1199.5	264.3	151	-2.18	-0.81	adhesion G protein-coupled receptor G1 [Source:HGNC Symbol;Acc:HGNC:4512]
ENSG00000150594	ADRA2A	396.9	14.7	5.2	-4.75	-1.45	adrenoceptor alpha 2A [Source:HGNC Symbol;Acc:HGNC:281]
ENSG00000184160	ADRA2C	454.6	41.9	22.1	-3.44	-0.93	adrenoceptor alpha 2C [Source:HGNC Symbol;Acc:HGNC:283]
ENSG00000185100	ADSSL1	801.4	355.1	148.8	-1.18	-1.26	adenylosuccinate synthase like 1 [Source:HGNC Symbol;Acc:HGNC:20093]
ENSG00000169129	AFAP1L2	313	80.1	20.6	-1.97	-1.94	actin filament associated protein 1 like 2 [Source:HGNC Symbol;Acc:HGNC:25901]
ENSG00000176092	AIM1L	1216.5	236.7	94.7	-2.36	-1.32	absent in melanoma 1-like [Source:HGNC Symbol;Acc:HGNC:17295]
ENSG00000117020	AKT3	1621.2	631.7	118.9	-1.36	-2.41	AKT serine/threonine kinase 3 [Source:HGNC Symbol;Acc:HGNC:393]
ENSG00000170017	ALCAM	2455.4	762.7	215.6	-1.69	-1.82	activated leukocyte cell adhesion molecule [Source:HGNC Symbol;Acc:HGNC:400]
ENSG00000165092	ALDH1A1	4374.1	1130.6	171.5	-1.95	-2.72	aldehyde dehydrogenase 1 family member A1 [Source:HGNC Symbol;Acc:HGNC:402]
ENSG00000012779	ALOX5	292.9	25.7	4.6	-3.51	-2.48	arachidonate 5-lipoxygenase [Source:HGNC Symbol;Acc:HGNC:435]
ENSG00000178038	ALS2CL	1696.3	174.5	42	-3.28	-2.05	ALS2 C-terminal like [Source:HGNC Symbol;Acc:HGNC:20605]
ENSG00000166126	AMN	318	125.2	24	-1.34	-2.38	amnion associated transmembrane protein [Source:HGNC Symbol;Acc:HGNC:14604]
ENSG00000151150	ANK3	2078	1093.7	483.3	-0.93	-1.18	ankyrin 3 [Source:HGNC Symbol;Acc:HGNC:494]
ENSG00000185101	ANO9	3948.6	1488.4	517.8	-1.41	-1.52	anoctamin 9 [Source:HGNC Symbol;Acc:HGNC:20679]
ENSG00000011201	ANOS1	271.7	33.9	12.4	-3.01	-1.46	anosmin 1 [Source:HGNC Symbol;Acc:HGNC:6211]
ENSG00000131480	AOC2	322.3	90.4	50.1	-1.84	-0.86	amine oxidase, copper containing 2 [Source:HGNC Symbol;Acc:HGNC:549]
ENSG00000243811	APOBEC3D	259.7	120.8	46.7	-1.11	-1.37	apolipoprotein B mRNA editing enzyme catalytic subunit 3D [Source:HGNC Symbol;Acc:HGNC:17354]
ENSG00000159314	ARHGAP27	791.3	210.4	88.9	-1.91	-1.24	Rho GTPase activating protein 27 [Source:HGNC Symbol;Acc:HGNC:31813]
ENSG00000180448	ARHGAP45	582.9	204.3	58.8	-1.51	-1.79	Rho GTPase activating protein 45 [Source:HGNC Symbol;Acc:HGNC:17102]
ENSG00000241484	ARHGAP8	639.9	14.2	0.3	-5.49	-5.33	Rho GTPase activating protein 8 [Source:HGNC Symbol;Acc:HGNC:677]
ENSG00000111348	ARHGDIB	188.8	95.1	26.8	-0.99	-1.82	Rho GDP dissociation inhibitor beta [Source:HGNC Symbol;Acc:HGNC:679]
ENSG00000204959	ARHGEF34P	1798.5	384.1	71.8	-2.23	-2.41	Rho guanine nucleotide exchange factor 34, pseudogene [Source:HGNC Symbol;Acc:HGNC:38086]
ENSG00000213214	ARHGEF35	861.8	216.2	43.5	-1.99	-2.31	Rho guanine nucleotide exchange factor 35 [Source:HGNC Symbol;Acc:HGNC:33846]
ENSG00000050327	ARHGEF5	442.5	117.5	27.1	-1.91	-2.1	Rho guanine nucleotide exchange factor 5 [Source:HGNC Symbol;Acc:HGNC:13209]
ENSG00000126947	ARMCX1	977.9	571.9	119.5	-0.77	-2.25	armadillo repeat containing, X-linked 1 [Source:HGNC Symbol;Acc:HGNC:18073]
ENSG00000184867	ARMCX2	2143.3	1223.7	423.5	-0.81	-1.53	armadillo repeat containing, X-linked 2 [Source:HGNC Symbol;Acc:HGNC:16869]
ENSG00000196440	ARMCX4	931.6	290	75.5	-1.68	-1.93	armadillo repeat containing, X-linked 4 [Source:HGNC Symbol;Acc:HGNC:28615]
ENSG00000174939	ASPHD1	342.9	60.6	14.7	-2.5	-2.03	aspartate beta-hydroxylase domain containing 1 [Source:HGNC Symbol;Acc:HGNC:27380]
ENSG00000130707	ASS1	240.2	131.5	33.3	-0.87	-1.99	argininosuccinate synthase 1 [Source:HGNC Symbol;Acc:HGNC:758]
ENSG00000064270	ATP2C2	851.5	221	33.1	-1.95	-2.74	ATPase secretory pathway Ca2+ transporting 2 [Source:HGNC Symbol;Acc:HGNC:29103]
ENSG00000081923	ATP8B1	1592.7	224.7	37.4	-2.82	-2.59	ATPase phospholipid transporting 8B1 [Source:HGNC Symbol;Acc:HGNC:3706]
ENSG00000172232	AZU1	254.9	62.2	17.2	-2.04	-1.87	azurocidin 1 [Source:HGNC Symbol;Acc:HGNC:913]
ENSG00000109956	B3GAT1	663.8	107.9	16.7	-2.62	-2.7	beta-1,3-glucuronyltransferase 1 [Source:HGNC Symbol;Acc:HGNC:921]
ENSG00000156966	B3GNT7	1071.3	295.2	106.1	-1.86	-1.47	UDP-GlcNAc:betaGal beta-1,3-N-acetylglucosaminyltransferase 7 [Source:HGNC Symbol;Acc:HGNC:18811]
ENSG00000237172	B3GNT9	307.7	169.6	71.4	-0.86	-1.25	UDP-GlcNAc:betaGal beta-1,3-N-acetylglucosaminyltransferase 9 [Source:HGNC Symbol;Acc:HGNC:28714]
ENSG00000007516	BAIAP3	830.7	496.6	259.7	-0.74	-0.93	BAI1 associated protein 3 [Source:HGNC Symbol;Acc:HGNC:948]
ENSG00000119866	BCL11A	267.6	9.6	0.9	-4.79	-3.31	B-cell CLL/lymphoma 11A [Source:HGNC Symbol;Acc:HGNC:13221]
ENSG00000113916	BCL6	1483.8	534.8	211.8	-1.47	-1.33	B-cell CLL/lymphoma 6 [Source:HGNC Symbol;Acc:HGNC:1001]
ENSG00000136717	BIN1	2807.6	1469.4	829.7	-0.93	-0.82	bridging integrator 1 [Source:HGNC Symbol;Acc:HGNC:1052]
ENSG00000281406	BLACAT1	730.6	158.7	26	-2.2	-2.61	bladder cancer associated transcript 1 (non-protein coding) [Source:HGNC Symbol;Acc:HGNC:48597]
ENSG00000176720	BOK	916.6	191.6	70.4	-2.26	-1.45	BOK, BCL2 family apoptosis regulator [Source:HGNC Symbol;Acc:HGNC:1087]
ENSG00000119411	BSPRY	626.3	58.4	6.3	-3.42	-3.19	B-box and SPRY domain containing [Source:HGNC Symbol;Acc:HGNC:18232]
ENSG00000107738	C10orf54	588.1	224.9	103.2	-1.39	-1.12	chromosome 10 open reading frame 54 [Source:HGNC Symbol;Acc:HGNC:30085]
ENSG00000165863	C10orf82	915.6	203.9	23.4	-2.17	-3.12	chromosome 10 open reading frame 82 [Source:HGNC Symbol;Acc:HGNC:28500]
ENSG00000109944	C11orf63	209.5	92.2	52	-1.19	-0.83	chromosome 11 open reading frame 63 [Source:HGNC Symbol;Acc:HGNC:26288]
ENSG00000253313	C1orf210	887.3	156.4	49.6	-2.5	-1.66	chromosome 1 open reading frame 210 [Source:HGNC Symbol;Acc:HGNC:28755]
ENSG00000159403	C1R	403.1	244	105.3	-0.73	-1.21	complement C1r [Source:HGNC Symbol;Acc:HGNC:1246]
ENSG00000174403	C20orf166-AS1	338.9	28.4	2.6	-3.58	-3.45	C20orf166 antisense RNA 1 [Source:HGNC Symbol;Acc:HGNC:26393]
ENSG00000273045	C2orf15	272.5	91.2	48.8	-1.58	-0.9	chromosome 2 open reading frame 15 [Source:HGNC Symbol;Acc:HGNC:28436]
ENSG00000100346	CACNA1I	330.9	44.2	2.3	-2.91	-4.26	calcium voltage-gated channel subunit alpha1 I [Source:HGNC Symbol;Acc:HGNC:1396]
ENSG00000130433	CACNG6	958	284.7	54.4	-1.75	-2.39	calcium voltage-gated channel auxiliary subunit gamma 6 [Source:HGNC Symbol;Acc:HGNC:13625]
ENSG00000142408	CACNG8	269.7	32.1	7.1	-3.07	-2.2	calcium voltage-gated channel auxiliary subunit gamma 8 [Source:HGNC Symbol;Acc:HGNC:13628]
ENSG00000183049	CAMK1D	515.6	107.4	39.8	-2.26	-1.43	calcium/calmodulin dependent protein kinase ID [Source:HGNC Symbol;Acc:HGNC:19341]
ENSG00000042493	CAPG	2006.2	311.8	74.3	-2.68	-2.07	capping actin protein, gelsolin like [Source:HGNC Symbol;Acc:HGNC:1474]
ENSG00000182472	CAPN12	766.9	312.9	98.1	-1.29	-1.67	calpain 12 [Source:HGNC Symbol;Acc:HGNC:13249]
ENSG00000162909	CAPN2	1804.7	646.1	218.3	-1.48	-1.56	calpain 2 [Source:HGNC Symbol;Acc:HGNC:1479]
ENSG00000130940	CASZ1	1010.3	140.5	85	-2.85	-0.73	castor zinc finger 1 [Source:HGNC Symbol;Acc:HGNC:26002]
ENSG00000105971	CAV2	403	227.6	136.7	-0.82	-0.73	caveolin 2 [Source:HGNC Symbol;Acc:HGNC:1528]
ENSG00000142273	CBLC	1075.9	156	57.3	-2.79	-1.45	Cbl proto-oncogene C [Source:HGNC Symbol;Acc:HGNC:15961]
ENSG00000128596	CCDC136	876.9	424.3	194.9	-1.05	-1.12	coiled-coil domain containing 136 [Source:HGNC Symbol;Acc:HGNC:22225]
ENSG00000213213	CCDC183	697.4	341.9	91.2	-1.03	-1.9	coiled-coil domain containing 183 [Source:HGNC Symbol;Acc:HGNC:28236]
ENSG00000223745	CCDC18-AS1	675.4	331.2	192.8	-1.03	-0.78	CCDC18 antisense RNA 1 [Source:HGNC Symbol;Acc:HGNC:52262]
ENSG00000215039	CD27-AS1	526.1	128.2	42	-2.04	-1.6	CD27 antisense RNA 1 [Source:HGNC Symbol;Acc:HGNC:43896]
ENSG00000196352	CD55	294.6	145.3	25.7	-1.02	-2.49	CD55 molecule (Cromer blood group) [Source:HGNC Symbol;Acc:HGNC:2665]
ENSG00000137101	CD72	263.1	108.1	40.2	-1.28	-1.43	CD72 molecule [Source:HGNC Symbol;Acc:HGNC:1696]
ENSG00000110651	CD81	6417.9	3702.4	1438.3	-0.79	-1.36	CD81 molecule [Source:HGNC Symbol;Acc:HGNC:1701]
ENSG00000085117	CD82	300.9	113.6	29.2	-1.41	-1.97	CD82 molecule [Source:HGNC Symbol;Acc:HGNC:6210]
ENSG00000010278	CD9	421.1	164.8	11.8	-1.35	-3.79	CD9 molecule [Source:HGNC Symbol;Acc:HGNC:1709]
ENSG00000163814	CDCP1	401.4	48.3	3.8	-3.05	-3.61	CUB domain containing protein 1 [Source:HGNC Symbol;Acc:HGNC:24357]
ENSG00000062038	CDH3	5883.8	151.6	24.1	-5.28	-2.66	cadherin 3 [Source:HGNC Symbol;Acc:HGNC:1762]
ENSG00000117266	CDK18	1557.1	613	122.7	-1.34	-2.32	cyclin dependent kinase 18 [Source:HGNC Symbol;Acc:HGNC:8751]
ENSG00000105810	CDK6	933.9	143.9	23.4	-2.7	-2.61	cyclin dependent kinase 6 [Source:HGNC Symbol;Acc:HGNC:1777]
ENSG00000110318	CEP126	326.2	101	51	-1.69	-0.98	centrosomal protein 126 [Source:HGNC Symbol;Acc:HGNC:29264]
ENSG00000167123	CERCAM	1348.3	728.6	411.5	-0.89	-0.82	cerebral endothelial cell adhesion molecule [Source:HGNC Symbol;Acc:HGNC:23723]
ENSG00000105792	CFAP69	217.6	58	30	-1.91	-0.95	cilia and flagella associated protein 69 [Source:HGNC Symbol;Acc:HGNC:26107]
ENSG00000090539	CHRD	1399.7	660.1	359	-1.08	-0.88	chordin [Source:HGNC Symbol;Acc:HGNC:1949]
ENSG00000182022	CHST15	288.7	24.7	0.6	-3.55	-5.31	carbohydrate sulfotransferase 15 [Source:HGNC Symbol;Acc:HGNC:18137]
ENSG00000186510	CLCNKA	336.4	61.5	17.8	-2.45	-1.79	chloride voltage-gated channel Ka [Source:HGNC Symbol;Acc:HGNC:2026]
ENSG00000184908	CLCNKB	291.4	76.7	17.3	-1.93	-2.18	chloride voltage-gated channel Kb [Source:HGNC Symbol;Acc:HGNC:2027]
ENSG00000164007	CLDN19	644.4	149	40.1	-2.11	-1.9	claudin 19 [Source:HGNC Symbol;Acc:HGNC:2040]
ENSG00000165215	CLDN3	2087.6	184.8	82.2	-3.5	-1.17	claudin 3 [Source:HGNC Symbol;Acc:HGNC:2045]
ENSG00000189143	CLDN4	9843.5	372.1	85.8	-4.73	-2.11	claudin 4 [Source:HGNC Symbol;Acc:HGNC:2046]
ENSG00000181885	CLDN7	3859.3	258.5	12.4	-3.9	-4.37	claudin 7 [Source:HGNC Symbol;Acc:HGNC:2049]
ENSG00000112782	CLIC5	403.6	60.9	17.4	-2.73	-1.79	chloride intracellular channel 5 [Source:HGNC Symbol;Acc:HGNC:13517]
ENSG00000198515	CNGA1	189.3	80.4	37.6	-1.24	-1.09	cyclic nucleotide gated channel alpha 1 [Source:HGNC Symbol;Acc:HGNC:2148]
ENSG00000142675	CNKSR1	1079.3	110.3	22.5	-3.29	-2.28	connector enhancer of kinase suppressor of Ras 1 [Source:HGNC Symbol;Acc:HGNC:19700]
ENSG00000130176	CNN1	600.3	123.6	61	-2.28	-1.01	calponin 1 [Source:HGNC Symbol;Acc:HGNC:2155]
ENSG00000060718	COL11A1	3875.7	436.7	59.4	-3.15	-2.87	collagen type XI alpha 1 chain [Source:HGNC Symbol;Acc:HGNC:2186]
ENSG00000164692	COL1A2	25056.5	672.2	48.6	-5.22	-3.79	collagen type I alpha 2 chain [Source:HGNC Symbol;Acc:HGNC:2198]
ENSG00000187498	COL4A1	12714	3753.2	930.5	-1.76	-2.01	collagen type IV alpha 1 chain [Source:HGNC Symbol;Acc:HGNC:2202]
ENSG00000134871	COL4A2	23169.3	6422.8	1398.9	-1.85	-2.2	collagen type IV alpha 2 chain [Source:HGNC Symbol;Acc:HGNC:2203]
ENSG00000130635	COL5A1	5659.3	1100.1	159.8	-2.36	-2.78	collagen type V alpha 1 chain [Source:HGNC Symbol;Acc:HGNC:2209]
ENSG00000142173	COL6A2	8253.2	3834.9	951.5	-1.11	-2.01	collagen type VI alpha 2 chain [Source:HGNC Symbol;Acc:HGNC:2212]
ENSG00000139117	CPNE8	195.8	95.8	4.1	-1.03	-4.43	copine 8 [Source:HGNC Symbol;Acc:HGNC:23498]
ENSG00000169169	CPT1C	2498.4	763.5	436.1	-1.71	-0.81	carnitine palmitoyltransferase 1C [Source:HGNC Symbol;Acc:HGNC:18540]
ENSG00000163703	CRELD1	3699.9	2021.4	1056.3	-0.87	-0.94	cysteine rich with EGF like domains 1 [Source:HGNC Symbol;Acc:HGNC:14630]
ENSG00000103196	CRISPLD2	331.5	24.8	10.9	-3.73	-1.17	cysteine rich secretory protein LCCL domain containing 2 [Source:HGNC Symbol;Acc:HGNC:25248]
ENSG00000072832	CRMP1	444.7	54.5	14.2	-3.03	-1.93	collapsin response mediator protein 1 [Source:HGNC Symbol;Acc:HGNC:2365]
ENSG00000172346	CSDC2	248.7	32.5	12.7	-2.94	-1.35	cold shock domain containing C2 [Source:HGNC Symbol;Acc:HGNC:30359]
ENSG00000161921	CXCL16	240.5	51	6.6	-2.24	-2.96	C-X-C motif chemokine ligand 16 [Source:HGNC Symbol;Acc:HGNC:16642]
ENSG00000166394	CYB5R2	441.8	206.7	44.4	-1.09	-2.22	cytochrome b5 reductase 2 [Source:HGNC Symbol;Acc:HGNC:24376]
ENSG00000135929	CYP27A1	1364.9	530.3	248.7	-1.36	-1.09	cytochrome P450 family 27 subfamily A member 1 [Source:HGNC Symbol;Acc:HGNC:2605]
ENSG00000205795	CYS1	709.4	71.4	12.7	-3.31	-2.5	cystin 1 [Source:HGNC Symbol;Acc:HGNC:18525]
ENSG00000003249	DBNDD1	1161.8	151.4	40.2	-2.94	-1.91	dysbindin domain containing 1 [Source:HGNC Symbol;Acc:HGNC:28455]
ENSG00000163354	DCST2	198.9	70.3	34.3	-1.5	-1.04	DC-STAMP domain containing 2 [Source:HGNC Symbol;Acc:HGNC:26562]
ENSG00000204580	DDR1	9345.8	3699.1	2102.1	-1.34	-0.82	discoidin domain receptor tyrosine kinase 1 [Source:HGNC Symbol;Acc:HGNC:2730]
ENSG00000107984	DKK1	625.9	52.1	8.9	-3.59	-2.53	dickkopf WNT signaling pathway inhibitor 1 [Source:HGNC Symbol;Acc:HGNC:2891]
ENSG00000161249	DMKN	3253.3	1177.6	616	-1.47	-0.93	dermokine [Source:HGNC Symbol;Acc:HGNC:25063]
ENSG00000184911	DMRTC1B	246.9	82.8	22.7	-1.58	-1.84	DMRT like family C1B [Source:HGNC Symbol;Acc:HGNC:31686]
ENSG00000116675	DNAJC6	550.5	297.7	149.8	-0.89	-0.99	DnaJ heat shock protein family (Hsp40) member C6 [Source:HGNC Symbol;Acc:HGNC:15469]
ENSG00000105612	DNASE2	1853.8	994.4	528	-0.9	-0.91	deoxyribonuclease 2, lysosomal [Source:HGNC Symbol;Acc:HGNC:2960]
ENSG00000205683	DPF3	248.1	78.7	23.6	-1.66	-1.74	double PHD fingers 3 [Source:HGNC Symbol;Acc:HGNC:17427]
ENSG00000176978	DPP7	2219.4	762.9	208.2	-1.54	-1.87	dipeptidyl peptidase 7 [Source:HGNC Symbol;Acc:HGNC:14892]
ENSG00000177103	DSCAML1	292.1	53.7	23.5	-2.44	-1.19	DS cell adhesion molecule like 1 [Source:HGNC Symbol;Acc:HGNC:14656]
ENSG00000134769	DTNA	1120.1	56.8	10.2	-4.3	-2.46	dystrobrevin alpha [Source:HGNC Symbol;Acc:HGNC:3057]
ENSG00000140279	DUOX2	374.5	28	3	-3.74	-3.24	dual oxidase 2 [Source:HGNC Symbol;Acc:HGNC:13273]
ENSG00000121310	ECHDC2	1578.3	752.2	423.6	-1.07	-0.83	enoyl-CoA hydratase domain containing 2 [Source:HGNC Symbol;Acc:HGNC:23408]
ENSG00000101210	EEF1A2	4793.7	148.4	27.7	-5.01	-2.43	eukaryotic translation elongation factor 1 alpha 2 [Source:HGNC Symbol;Acc:HGNC:3192]
ENSG00000169242	EFNA1	1537.8	585.4	251.9	-1.39	-1.22	ephrin A1 [Source:HGNC Symbol;Acc:HGNC:3221]
ENSG00000143590	EFNA3	221.4	110.5	53.1	-1	-1.07	ephrin A3 [Source:HGNC Symbol;Acc:HGNC:3223]
ENSG00000163435	ELF3	3211.2	796.3	189.5	-2.01	-2.07	E74 like ETS transcription factor 3 [Source:HGNC Symbol;Acc:HGNC:3318]
ENSG00000102034	ELF4	920.6	460.2	206	-1	-1.16	E74 like ETS transcription factor 4 [Source:HGNC Symbol;Acc:HGNC:3319]
ENSG00000166897	ELFN2	265.8	18.5	2.2	-3.85	-3.01	extracellular leucine rich repeat and fibronectin type III domain containing 2 [Source:HGNC Symbol;Acc:HGNC:29396]
ENSG00000125746	EML2	1826.3	628.5	334.2	-1.54	-0.91	echinoderm microtubule associated protein like 2 [Source:HGNC Symbol;Acc:HGNC:18035]
ENSG00000112796	ENPP5	466.2	67.1	6.8	-2.8	-3.28	ectonucleotide pyrophosphatase/phosphodiesterase 5 (putative) [Source:HGNC Symbol;Acc:HGNC:13717]
ENSG00000088367	EPB41L1	2667.7	1195.3	553.2	-1.16	-1.11	erythrocyte membrane protein band 4.1 like 1 [Source:HGNC Symbol;Acc:HGNC:3378]
ENSG00000082397	EPB41L3	1424.5	665	328.6	-1.1	-1.02	erythrocyte membrane protein band 4.1 like 3 [Source:HGNC Symbol;Acc:HGNC:3380]
ENSG00000129595	EPB41L4A	580.6	159	50	-1.87	-1.67	erythrocyte membrane protein band 4.1 like 4A [Source:HGNC Symbol;Acc:HGNC:13278]
ENSG00000146904	EPHA1	2298	320.9	125.7	-2.84	-1.35	EPH receptor A1 [Source:HGNC Symbol;Acc:HGNC:3385]
ENSG00000080224	EPHA6	420	85.9	44.8	-2.29	-0.93	EPH receptor A6 [Source:HGNC Symbol;Acc:HGNC:19296]
ENSG00000106123	EPHB6	687.4	43.3	2.6	-3.99	-4	EPH receptor B6 [Source:HGNC Symbol;Acc:HGNC:3396]
ENSG00000105131	EPHX3	260.2	18.1	1.9	-3.84	-3.35	epoxide hydrolase 3 [Source:HGNC Symbol;Acc:HGNC:23760]
ENSG00000261150	EPPK1	2823.3	372.2	128.9	-2.92	-1.53	epiplakin 1 [Source:HGNC Symbol;Acc:HGNC:15577]
ENSG00000131037	EPS8L1	1573.6	78.6	22	-4.32	-1.84	EPS8 like 1 [Source:HGNC Symbol;Acc:HGNC:21295]
ENSG00000177106	EPS8L2	6960.6	1825.9	975.1	-1.93	-0.9	EPS8 like 2 [Source:HGNC Symbol;Acc:HGNC:21296]
ENSG00000086619	ERO1B	244.2	72.7	18.2	-1.74	-1.99	endoplasmic reticulum oxidoreductase 1 beta [Source:HGNC Symbol;Acc:HGNC:14355]
ENSG00000164283	ESM1	637.9	41.6	0.7	-3.94	-5.94	endothelial cell specific molecule 1 [Source:HGNC Symbol;Acc:HGNC:3466]
ENSG00000187609	EXD3	2010.7	897.7	394.8	-1.16	-1.18	exonuclease 3'-5' domain containing 3 [Source:HGNC Symbol;Acc:HGNC:26023]
ENSG00000158769	F11R	6578.2	2154.7	1161.6	-1.61	-0.89	F11 receptor [Source:HGNC Symbol;Acc:HGNC:14685]
ENSG00000164251	F2RL1	1937.5	349.3	45.3	-2.47	-2.95	F2R like trypsin receptor 1 [Source:HGNC Symbol;Acc:HGNC:3538]
ENSG00000177706	FAM20C	879.2	176.5	96.3	-2.32	-0.88	FAM20C, golgi associated secretory pathway kinase [Source:HGNC Symbol;Acc:HGNC:22140]
ENSG00000116661	FBXO2	3133.8	260.2	61	-3.59	-2.09	F-box protein 2 [Source:HGNC Symbol;Acc:HGNC:13581]
ENSG00000163013	FBXO41	916	56.5	18	-4.02	-1.66	F-box protein 41 [Source:HGNC Symbol;Acc:HGNC:29409]
ENSG00000132879	FBXO44	1666.5	415.4	219.2	-2	-0.92	F-box protein 44 [Source:HGNC Symbol;Acc:HGNC:24847]
ENSG00000130475	FCHO1	230	44.2	13	-2.38	-1.78	FCH domain only 1 [Source:HGNC Symbol;Acc:HGNC:29002]
ENSG00000088340	FER1L4	1336.2	628.5	141.7	-1.09	-2.15	fer-1 like family member 4, pseudogene [Source:HGNC Symbol;Acc:HGNC:15801]
ENSG00000101311	FERMT1	309.9	17.6	3.4	-4.13	-2.31	fermitin family member 1 [Source:HGNC Symbol;Acc:HGNC:15889]
ENSG00000182511	FES	460	212.4	122.9	-1.11	-0.79	FES proto-oncogene, tyrosine kinase [Source:HGNC Symbol;Acc:HGNC:3657]
ENSG00000128591	FLNC	5848.6	1537.5	770.8	-1.93	-1	filamin C [Source:HGNC Symbol;Acc:HGNC:3756]
ENSG00000102755	FLT1	896.4	407	40.2	-1.14	-3.33	fms related tyrosine kinase 1 [Source:HGNC Symbol;Acc:HGNC:3763]
ENSG00000075426	FOSL2	1720	437.6	167.2	-1.97	-1.39	FOS like 2, AP-1 transcription factor subunit [Source:HGNC Symbol;Acc:HGNC:3798]
ENSG00000151474	FRMD4A	3835.1	977.5	426.2	-1.97	-1.2	FERM domain containing 4A [Source:HGNC Symbol;Acc:HGNC:25491]
ENSG00000172461	FUT9	665.7	33.3	3.5	-4.32	-3.23	fucosyltransferase 9 [Source:HGNC Symbol;Acc:HGNC:4020]
ENSG00000139112	GABARAPL1	5532.5	2860.1	1512.9	-0.95	-0.92	GABA type A receptor associated protein like 1 [Source:HGNC Symbol;Acc:HGNC:4068]
ENSG00000115339	GALNT3	2330.4	222.3	41.9	-3.39	-2.41	polypeptide N-acetylgalactosaminyltransferase 3 [Source:HGNC Symbol;Acc:HGNC:4125]
ENSG00000139629	GALNT6	386.1	36.8	2.4	-3.39	-3.98	polypeptide N-acetylgalactosaminyltransferase 6 [Source:HGNC Symbol;Acc:HGNC:4128]
ENSG00000141013	GAS8	336.9	19.2	1.6	-4.12	-3.56	growth arrest specific 8 [Source:HGNC Symbol;Acc:HGNC:4166]
ENSG00000130700	GATA5	373.7	130.3	26	-1.52	-2.33	GATA binding protein 5 [Source:HGNC Symbol;Acc:HGNC:15802]
ENSG00000266010	GATA6-AS1	1696.4	730.9	243.5	-1.21	-1.58	GATA6 antisense RNA 1 (head to head) [Source:HGNC Symbol;Acc:HGNC:48840]
ENSG00000171766	GATM	2257.3	896.7	429.1	-1.33	-1.06	glycine amidinotransferase [Source:HGNC Symbol;Acc:HGNC:4175]
ENSG00000148288	GBGT1	242.9	57.7	14.5	-2.07	-2.02	globoside alpha-1,3-N-acetylgalactosaminyltransferase 1 [Source:HGNC Symbol;Acc:HGNC:20460]
ENSG00000119125	GDA	483.1	103.2	14.7	-2.23	-2.8	guanine deaminase [Source:HGNC Symbol;Acc:HGNC:4212]
ENSG00000137960	GIPC2	280.3	51.6	14.3	-2.44	-1.85	GIPC PDZ domain containing family member 2 [Source:HGNC Symbol;Acc:HGNC:18177]
ENSG00000149328	GLB1L2	558.1	68.9	4.8	-3.02	-3.8	galactosidase beta 1 like 2 [Source:HGNC Symbol;Acc:HGNC:25129]
ENSG00000076716	GPC4	1374.8	173.1	73.6	-2.99	-1.23	glypican 4 [Source:HGNC Symbol;Acc:HGNC:4452]
ENSG00000077585	GPR137B	238.1	39.9	3	-2.57	-3.63	G protein-coupled receptor 137B [Source:HGNC Symbol;Acc:HGNC:11862]
ENSG00000180758	GPR157	468.2	275.1	165.2	-0.77	-0.74	G protein-coupled receptor 157 [Source:HGNC Symbol;Acc:HGNC:23687]
ENSG00000013588	GPRC5A	1482.7	264.6	24	-2.49	-3.46	G protein-coupled receptor class C group 5 member A [Source:HGNC Symbol;Acc:HGNC:9836]
ENSG00000178075	GRAMD1C	410.5	245.5	122	-0.74	-1.01	GRAM domain containing 1C [Source:HGNC Symbol;Acc:HGNC:25252]
ENSG00000141738	GRB7	2866.7	404.7	52.2	-2.82	-2.95	growth factor receptor bound protein 7 [Source:HGNC Symbol;Acc:HGNC:4567]
ENSG00000105737	GRIK5	922	324.6	25.2	-1.51	-3.69	glutamate ionotropic receptor kainate type subunit 5 [Source:HGNC Symbol;Acc:HGNC:4583]
ENSG00000116032	GRIN3B	394.3	145.3	28.2	-1.44	-2.38	glutamate ionotropic receptor NMDA type subunit 3B [Source:HGNC Symbol;Acc:HGNC:16768]
ENSG00000073605	GSDMB	2770.3	992.8	488.5	-1.48	-1.02	gasdermin B [Source:HGNC Symbol;Acc:HGNC:23690]
ENSG00000134184	GSTM1	675.5	329.2	46.5	-1.04	-2.81	glutathione S-transferase mu 1 [Source:HGNC Symbol;Acc:HGNC:4632]
ENSG00000213366	GSTM2	2312.3	1210.9	650.9	-0.93	-0.9	glutathione S-transferase mu 2 [Source:HGNC Symbol;Acc:HGNC:4634]
ENSG00000134202	GSTM3	3533.2	1848.4	1051.8	-0.93	-0.81	glutathione S-transferase mu 3 [Source:HGNC Symbol;Acc:HGNC:4635]
ENSG00000065621	GSTO2	249.3	76.1	43	-1.71	-0.82	glutathione S-transferase omega 2 [Source:HGNC Symbol;Acc:HGNC:23064]
ENSG00000112599	GUCA1B	187.4	61.2	33.8	-1.62	-0.87	guanylate cyclase activator 1B [Source:HGNC Symbol;Acc:HGNC:4679]
ENSG00000061918	GUCY1B3	310.8	101.6	43.9	-1.61	-1.22	guanylate cyclase 1 soluble subunit beta [Source:HGNC Symbol;Acc:HGNC:4687]
ENSG00000228223	HCG11	446.6	245	69.2	-0.87	-1.82	HLA complex group 11 (non-protein coding) [Source:HGNC Symbol;Acc:HGNC:17707]
ENSG00000127311	HELB	388.6	223.4	129.2	-0.8	-0.79	DNA helicase B [Source:HGNC Symbol;Acc:HGNC:17196]
ENSG00000114315	HES1	3883.4	2172.8	1207	-0.84	-0.85	hes family bHLH transcription factor 1 [Source:HGNC Symbol;Acc:HGNC:5192]
ENSG00000164683	HEY1	1770.7	725.5	257.9	-1.29	-1.49	hes related family bHLH transcription factor with YRPW motif 1 [Source:HGNC Symbol;Acc:HGNC:4880]
ENSG00000206503	HLA-A	5998.3	3183	1425.8	-0.91	-1.16	major histocompatibility complex, class I, A [Source:HGNC Symbol;Acc:HGNC:4931]
ENSG00000234745	HLA-B	2975.9	174.5	19.3	-4.09	-3.16	major histocompatibility complex, class I, B [Source:HGNC Symbol;Acc:HGNC:4932]
ENSG00000204525	HLA-C	8688.3	2422.3	1428.4	-1.84	-0.76	major histocompatibility complex, class I, C [Source:HGNC Symbol;Acc:HGNC:4933]
ENSG00000223865	HLA-DPB1	333.1	5.2	0	-6	-4.83	major histocompatibility complex, class II, DP beta 1 [Source:HGNC Symbol;Acc:HGNC:4940]
ENSG00000179344	HLA-DQB1	539.4	8.8	0.3	-5.94	-4.63	major histocompatibility complex, class II, DQ beta 1 [Source:HGNC Symbol;Acc:HGNC:4944]
ENSG00000204592	HLA-E	3885.9	2230.3	948.8	-0.8	-1.23	major histocompatibility complex, class I, E [Source:HGNC Symbol;Acc:HGNC:4962]
ENSG00000206341	HLA-H	1530.7	727.3	342.6	-1.07	-1.08	major histocompatibility complex, class I, H (pseudogene) [Source:HGNC Symbol;Acc:HGNC:4965]
ENSG00000105707	HPN	9510.1	4807	1520.9	-0.98	-1.66	hepsin [Source:HGNC Symbol;Acc:HGNC:5155]
ENSG00000171004	HS6ST2	1321.3	297	151.2	-2.15	-0.97	heparan sulfate 6-O-sulfotransferase 2 [Source:HGNC Symbol;Acc:HGNC:19133]
ENSG00000087076	HSD17B14	461.9	250.3	145.3	-0.88	-0.79	hydroxysteroid 17-beta dehydrogenase 14 [Source:HGNC Symbol;Acc:HGNC:23238]
ENSG00000126803	HSPA2	195.6	116.9	60.1	-0.74	-0.96	heat shock protein family A (Hsp70) member 2 [Source:HGNC Symbol;Acc:HGNC:5235]
ENSG00000174498	IGDCC3	6783.6	2771.5	1127.8	-1.29	-1.3	immunoglobulin superfamily DCC subclass member 3 [Source:HGNC Symbol;Acc:HGNC:9700]
ENSG00000115461	IGFBP5	18661.8	3652.2	726.7	-2.35	-2.33	insulin like growth factor binding protein 5 [Source:HGNC Symbol;Acc:HGNC:5474]
ENSG00000147255	IGSF1	1082.6	594.4	343.3	-0.87	-0.79	immunoglobulin superfamily member 1 [Source:HGNC Symbol;Acc:HGNC:5948]
ENSG00000198825	INPP5F	4521.2	2309.8	1321.8	-0.97	-0.8	inositol polyphosphate-5-phosphatase F [Source:HGNC Symbol;Acc:HGNC:17054]
ENSG00000117595	IRF6	1460.1	106.7	3.7	-3.77	-4.81	interferon regulatory factor 6 [Source:HGNC Symbol;Acc:HGNC:6121]
ENSG00000005884	ITGA3	4099.6	919.5	302.7	-2.16	-1.6	integrin subunit alpha 3 [Source:HGNC Symbol;Acc:HGNC:6139]
ENSG00000132470	ITGB4	965.5	250.3	48.5	-1.95	-2.37	integrin subunit beta 4 [Source:HGNC Symbol;Acc:HGNC:6158]
ENSG00000115221	ITGB6	1837.7	72.8	9	-4.66	-3.01	integrin subunit beta 6 [Source:HGNC Symbol;Acc:HGNC:6161]
ENSG00000105639	JAK3	343.8	64.8	4.2	-2.41	-3.87	Janus kinase 3 [Source:HGNC Symbol;Acc:HGNC:6193]
ENSG00000154118	JPH3	1046.5	58.9	5.1	-4.15	-3.57	junctophilin 3 [Source:HGNC Symbol;Acc:HGNC:14203]
ENSG00000183960	KCNH8	490.1	26.6	6.7	-4.2	-1.97	potassium voltage-gated channel subfamily H member 8 [Source:HGNC Symbol;Acc:HGNC:18864]
ENSG00000135750	KCNK1	447.4	5.8	0.4	-6.26	-4.04	potassium two pore domain channel subfamily K member 1 [Source:HGNC Symbol;Acc:HGNC:6272]
ENSG00000099337	KCNK6	629.1	116.2	19.6	-2.44	-2.57	potassium two pore domain channel subfamily K member 6 [Source:HGNC Symbol;Acc:HGNC:6281]
ENSG00000178695	KCTD12	677.6	243.5	80.8	-1.48	-1.59	potassium channel tetramerization domain containing 12 [Source:HGNC Symbol;Acc:HGNC:14678]
ENSG00000175707	KDF1	659.5	111.3	15.7	-2.57	-2.83	keratinocyte differentiation factor 1 [Source:HGNC Symbol;Acc:HGNC:26624]
ENSG00000112232	KHDRBS2	307.7	124.3	59	-1.31	-1.07	KH RNA binding domain containing, signal transduction associated 2 [Source:HGNC Symbol;Acc:HGNC:18114]
ENSG00000157404	KIT	452.1	152.6	48.4	-1.57	-1.65	KIT proto-oncogene receptor tyrosine kinase [Source:HGNC Symbol;Acc:HGNC:6342]
ENSG00000102349	KLF8	242.7	38.9	3.9	-2.64	-3.31	Kruppel like factor 8 [Source:HGNC Symbol;Acc:HGNC:6351]
ENSG00000171798	KNDC1	544.6	40.9	3.3	-3.74	-3.64	kinase non-catalytic C-lobe domain containing 1 [Source:HGNC Symbol;Acc:HGNC:29374]
ENSG00000159166	LAD1	1904.5	407.7	155.5	-2.22	-1.39	ladinin 1 [Source:HGNC Symbol;Acc:HGNC:6472]
ENSG00000172037	LAMB2	15830.4	7238.3	4105.6	-1.13	-0.82	laminin subunit beta 2 [Source:HGNC Symbol;Acc:HGNC:6487]
ENSG00000204381	LAYN	575	111.6	67.1	-2.37	-0.74	layilin [Source:HGNC Symbol;Acc:HGNC:29471]
ENSG00000186007	LEMD1	595.9	79.6	8.7	-2.9	-3.21	LEM domain containing 1 [Source:HGNC Symbol;Acc:HGNC:18725]
ENSG00000116977	LGALS8	1889.1	799.8	309.2	-1.24	-1.37	galectin 8 [Source:HGNC Symbol;Acc:HGNC:6569]
ENSG00000153012	LGI2	320.9	20.1	7	-3.99	-1.51	leucine rich repeat LGI family member 2 [Source:HGNC Symbol;Acc:HGNC:18710]
ENSG00000064042	LIMCH1	1765.3	812.4	432.9	-1.12	-0.91	LIM and calponin homology domains 1 [Source:HGNC Symbol;Acc:HGNC:29191]
ENSG00000072163	LIMS2	237.5	111.7	58.8	-1.09	-0.92	LIM zinc finger domain containing 2 [Source:HGNC Symbol;Acc:HGNC:16084]
ENSG00000251533	LINC00605	310.7	69.6	7.8	-2.16	-3.21	long intergenic non-protein coding RNA 605 [Source:HGNC Symbol;Acc:HGNC:43928]
ENSG00000245060	LINC00847	247.6	125.9	52.5	-0.98	-1.27	long intergenic non-protein coding RNA 847 [Source:HGNC Symbol;Acc:HGNC:45050]
ENSG00000281205	LINC00950	355.7	155.4	82.2	-1.2	-0.92	long intergenic non-protein coding RNA 950 [Source:HGNC Symbol;Acc:HGNC:28098]
ENSG00000204054	LINC00963	1175.2	666.4	376.6	-0.82	-0.82	long intergenic non-protein coding RNA 963 [Source:HGNC Symbol;Acc:HGNC:48716]
ENSG00000163898	LIPH	394.5	154.7	23.8	-1.35	-2.69	lipase H [Source:HGNC Symbol;Acc:HGNC:18483]
ENSG00000142235	LMTK3	978.1	343.1	140	-1.51	-1.29	lemur tyrosine kinase 3 [Source:HGNC Symbol;Acc:HGNC:19295]
ENSG00000072201	LNX1	1006.2	348.6	43.3	-1.53	-3	ligand of numb-protein X 1 [Source:HGNC Symbol;Acc:HGNC:6657]
ENSG00000129038	LOXL1	720.4	345.1	100.1	-1.06	-1.78	lysyl oxidase like 1 [Source:HGNC Symbol;Acc:HGNC:6665]
ENSG00000261801	LOXL1-AS1	235.1	90.4	18.1	-1.38	-2.32	LOXL1 antisense RNA 1 [Source:HGNC Symbol;Acc:HGNC:44169]
ENSG00000138131	LOXL4	3160.9	168.6	61.3	-4.23	-1.45	lysyl oxidase like 4 [Source:HGNC Symbol;Acc:HGNC:17171]
ENSG00000087253	LPCAT2	263.9	71.2	22.3	-1.89	-1.65	lysophosphatidylcholine acyltransferase 2 [Source:HGNC Symbol;Acc:HGNC:26032]
ENSG00000010626	LRRC23	301.7	177.3	100.9	-0.77	-0.81	leucine rich repeat containing 23 [Source:HGNC Symbol;Acc:HGNC:19138]
ENSG00000150551	LYPD1	590.9	21.4	5.1	-4.78	-2.02	LY6/PLAUR domain containing 1 [Source:HGNC Symbol;Acc:HGNC:28431]
ENSG00000183742	MACC1	986.8	108.4	42.5	-3.18	-1.35	MACC1, MET transcriptional regulator [Source:HGNC Symbol;Acc:HGNC:30215]
ENSG00000147676	MAL2	3935.6	1178.7	240.1	-1.74	-2.3	mal, T-cell differentiation protein 2 (gene/pseudogene) [Source:HGNC Symbol;Acc:HGNC:13634]
ENSG00000101460	MAP1LC3A	401.2	180	92.3	-1.16	-0.96	microtubule associated protein 1 light chain 3 alpha [Source:HGNC Symbol;Acc:HGNC:6838]
ENSG00000267278	MAP3K14-AS1	243.6	42.1	16.2	-2.53	-1.37	MAP3K14 antisense RNA 1 [Source:HGNC Symbol;Acc:HGNC:44359]
ENSG00000107968	MAP3K8	614.4	133.6	54.5	-2.2	-1.29	mitogen-activated protein kinase kinase kinase 8 [Source:HGNC Symbol;Acc:HGNC:6860]
ENSG00000156711	MAPK13	3187.6	729.6	121.7	-2.13	-2.58	mitogen-activated protein kinase 13 [Source:HGNC Symbol;Acc:HGNC:6875]
ENSG00000181085	MAPK15	940.9	138.2	47	-2.77	-1.54	mitogen-activated protein kinase 15 [Source:HGNC Symbol;Acc:HGNC:24667]
ENSG00000152939	MARVELD2	1808.8	750	413.2	-1.27	-0.86	MARVEL domain containing 2 [Source:HGNC Symbol;Acc:HGNC:26401]
ENSG00000055732	MCOLN3	1328.7	165.8	8.6	-3	-4.27	mucolipin 3 [Source:HGNC Symbol;Acc:HGNC:13358]
ENSG00000105419	MEIS3	1593.5	76.7	17.5	-4.38	-2.12	Meis homeobox 3 [Source:HGNC Symbol;Acc:HGNC:29537]
ENSG00000163975	MELTF	1383.7	722.1	263.7	-0.94	-1.45	melanotransferrin [Source:HGNC Symbol;Acc:HGNC:7037]
ENSG00000170430	MGMT	479	83.1	5.3	-2.53	-3.91	O-6-methylguanine-DNA methyltransferase [Source:HGNC Symbol;Acc:HGNC:7059]
ENSG00000141854	MISP3	252.4	105.1	50.6	-1.27	-1.07	MISP family member 3 [Source:HGNC Symbol;Acc:HGNC:26963]
ENSG00000196611	MMP1	932.7	135	8.7	-2.79	-3.95	matrix metallopeptidase 1 [Source:HGNC Symbol;Acc:HGNC:7155]
ENSG00000126005	MMP24-AS1	1340.1	724.8	358.4	-0.89	-1.01	MMP24 antisense RNA 1 [Source:HGNC Symbol;Acc:HGNC:44421]
ENSG00000079931	MOXD1	1240.3	518.7	236.9	-1.26	-1.13	monooxygenase DBH like 1 [Source:HGNC Symbol;Acc:HGNC:21063]
ENSG00000011028	MRC2	8939.3	4349.9	1300.7	-1.04	-1.74	mannose receptor C type 2 [Source:HGNC Symbol;Acc:HGNC:16875]
ENSG00000101825	MXRA5	211.8	76.3	12.4	-1.47	-2.65	matrix remodeling associated 5 [Source:HGNC Symbol;Acc:HGNC:7539]
ENSG00000162576	MXRA8	787.9	192.6	34.1	-2.03	-2.52	matrix remodeling associated 8 [Source:HGNC Symbol;Acc:HGNC:7542]
ENSG00000101335	MYL9	2271.5	583.5	337.2	-1.96	-0.79	myosin light chain 9 [Source:HGNC Symbol;Acc:HGNC:15754]
ENSG00000266714	MYO15B	3254	646.5	243.2	-2.33	-1.41	myosin XVB [Source:HGNC Symbol;Acc:HGNC:14083]
ENSG00000136274	NACAD	582.6	282	137.6	-1.05	-1.04	NAC alpha domain containing [Source:HGNC Symbol;Acc:HGNC:22196]
ENSG00000237886	NALT1	224.7	121.3	60.6	-0.89	-1	NOTCH1 associated lncRNA in T-cell acute lymphoblastic leukemia 1 [Source:HGNC Symbol;Acc:HGNC:51192]
ENSG00000184454	NCMAP	276.3	49.1	12.7	-2.49	-1.95	non-compact myelin associated protein [Source:HGNC Symbol;Acc:HGNC:29332]
ENSG00000078114	NEBL	667.9	373.2	120.8	-0.84	-1.63	nebulette [Source:HGNC Symbol;Acc:HGNC:16932]
ENSG00000100968	NFATC4	3706.6	1519.3	700	-1.29	-1.12	nuclear factor of activated T-cells 4 [Source:HGNC Symbol;Acc:HGNC:7778]
ENSG00000103024	NME3	772.8	400.3	136.4	-0.95	-1.55	NME/NM23 nucleoside diphosphate kinase 3 [Source:HGNC Symbol;Acc:HGNC:7851]
ENSG00000104967	NOVA2	202.6	85.2	5.4	-1.25	-3.95	NOVA alternative splicing regulator 2 [Source:HGNC Symbol;Acc:HGNC:7887]
ENSG00000188747	NOXA1	658.2	166.7	61.9	-1.98	-1.42	NADPH oxidase activator 1 [Source:HGNC Symbol;Acc:HGNC:10668]
ENSG00000107281	NPDC1	2877.2	846.9	287.1	-1.76	-1.56	neural proliferation, differentiation and control 1 [Source:HGNC Symbol;Acc:HGNC:7899]
ENSG00000215440	NPEPL1	1282.6	484.8	291.2	-1.4	-0.73	aminopeptidase-like 1 [Source:HGNC Symbol;Acc:HGNC:16244]
ENSG00000168743	NPNT	906.4	20.7	8.4	-5.45	-1.28	nephronectin [Source:HGNC Symbol;Acc:HGNC:27405]
ENSG00000169418	NPR1	222.2	93.7	6.2	-1.25	-3.87	natriuretic peptide receptor 1 [Source:HGNC Symbol;Acc:HGNC:7943]
ENSG00000118257	NRP2	1243.9	327	63.6	-1.93	-2.36	neuropilin 2 [Source:HGNC Symbol;Acc:HGNC:8005]
ENSG00000246082	NUDT16P1	247.5	86.3	17	-1.52	-2.33	nudix hydrolase 16 pseudogene 1 [Source:HGNC Symbol;Acc:HGNC:27189]
ENSG00000166924	NYAP1	422.8	241.8	70.5	-0.81	-1.79	neuronal tyrosine phosphorylated phosphoinositide-3-kinase adaptor 1 [Source:HGNC Symbol;Acc:HGNC:22009]
ENSG00000205978	NYNRIN	4514	2425.9	1344.9	-0.9	-0.85	NYN domain and retroviral integrase containing [Source:HGNC Symbol;Acc:HGNC:20165]
ENSG00000177989	ODF3B	224.7	80.7	8.1	-1.48	-3.28	outer dense fiber of sperm tails 3B [Source:HGNC Symbol;Acc:HGNC:34388]
ENSG00000197444	OGDHL	1107	209	71.2	-2.41	-1.56	oxoglutarate dehydrogenase-like [Source:HGNC Symbol;Acc:HGNC:25590]
ENSG00000105088	OLFM2	2642.5	827.9	261.3	-1.67	-1.66	olfactomedin 2 [Source:HGNC Symbol;Acc:HGNC:17189]
ENSG00000185585	OLFML2A	691.8	115.1	66.5	-2.59	-0.8	olfactomedin like 2A [Source:HGNC Symbol;Acc:HGNC:27270]
ENSG00000125510	OPRL1	252	88.4	46.3	-1.51	-0.94	opioid related nociceptin receptor 1 [Source:HGNC Symbol;Acc:HGNC:8155]
ENSG00000085465	OVGP1	602.3	216.9	117.5	-1.47	-0.88	oviductal glycoprotein 1 [Source:HGNC Symbol;Acc:HGNC:8524]
ENSG00000172818	OVOL1	556.9	79.9	17.2	-2.8	-2.23	ovo like transcriptional repressor 1 [Source:HGNC Symbol;Acc:HGNC:8525]
ENSG00000072682	P4HA2	3054.2	1697.5	758.6	-0.85	-1.16	prolyl 4-hydroxylase subunit alpha 2 [Source:HGNC Symbol;Acc:HGNC:8547]
ENSG00000178467	P4HTM	1696.1	466.9	55.2	-1.86	-3.08	prolyl 4-hydroxylase, transmembrane [Source:HGNC Symbol;Acc:HGNC:28858]
ENSG00000171759	PAH	1553.7	80.3	21.3	-4.27	-1.91	phenylalanine hydroxylase [Source:HGNC Symbol;Acc:HGNC:8582]
ENSG00000149269	PAK1	4809.1	2361.3	1336.4	-1.03	-0.82	p21 (RAC1) activated kinase 1 [Source:HGNC Symbol;Acc:HGNC:8590]
ENSG00000116117	PARD3B	1029	527.1	286.6	-0.96	-0.88	par-3 family cell polarity regulator beta [Source:HGNC Symbol;Acc:HGNC:14446]
ENSG00000169851	PCDH7	989.6	381	105.8	-1.38	-1.84	protocadherin 7 [Source:HGNC Symbol;Acc:HGNC:8659]
ENSG00000250120	PCDHA10	310.1	186.6	58.8	-0.73	-1.66	protocadherin alpha 10 [Source:HGNC Symbol;Acc:HGNC:8664]
ENSG00000102109	PCSK1N	937.2	189.9	75.5	-2.3	-1.33	proprotein convertase subtilisin/kexin type 1 inhibitor [Source:HGNC Symbol;Acc:HGNC:17301]
ENSG00000065989	PDE4A	208.1	121.2	62.2	-0.78	-0.96	phosphodiesterase 4A [Source:HGNC Symbol;Acc:HGNC:8780]
ENSG00000197461	PDGFA	3142.7	543	106.2	-2.53	-2.35	platelet derived growth factor subunit A [Source:HGNC Symbol;Acc:HGNC:8799]
ENSG00000100311	PDGFB	947.7	188.8	64.3	-2.33	-1.55	platelet derived growth factor subunit B [Source:HGNC Symbol;Acc:HGNC:8800]
ENSG00000120913	PDLIM2	378.4	160.6	37.8	-1.24	-2.09	PDZ and LIM domain 2 [Source:HGNC Symbol;Acc:HGNC:13992]
ENSG00000067057	PFKP	2195.3	823.2	173.9	-1.41	-2.24	phosphofructokinase, platelet [Source:HGNC Symbol;Acc:HGNC:8878]
ENSG00000103335	PIEZO1	6748.9	1199.7	590.8	-2.49	-1.02	piezo type mechanosensitive ion channel component 1 [Source:HGNC Symbol;Acc:HGNC:28993]
ENSG00000100100	PIK3IP1	594.9	290.8	127.1	-1.03	-1.19	phosphoinositide-3-kinase interacting protein 1 [Source:HGNC Symbol;Acc:HGNC:24942]
ENSG00000176485	PLA2G16	1090	483.1	277	-1.17	-0.8	phospholipase A2 group XVI [Source:HGNC Symbol;Acc:HGNC:17825]
ENSG00000153246	PLA2R1	486.1	289.6	57.7	-0.75	-2.32	phospholipase A2 receptor 1 [Source:HGNC Symbol;Acc:HGNC:9042]
ENSG00000145287	PLAC8	265	56.3	16.6	-2.23	-1.77	placenta specific 8 [Source:HGNC Symbol;Acc:HGNC:19254]
ENSG00000122861	PLAU	1262.5	603.6	252.9	-1.06	-1.26	plasminogen activator, urokinase [Source:HGNC Symbol;Acc:HGNC:9052]
ENSG00000115896	PLCL1	1424.1	80.2	16.4	-4.15	-2.27	phospholipase C like 1 [Source:HGNC Symbol;Acc:HGNC:9063]
ENSG00000008323	PLEKHG6	1630.5	500.3	177.5	-1.7	-1.49	pleckstrin homology and RhoGEF domain containing G6 [Source:HGNC Symbol;Acc:HGNC:25562]
ENSG00000141934	PLPP2	1157.7	46.6	4.8	-4.64	-3.27	phospholipid phosphatase 2 [Source:HGNC Symbol;Acc:HGNC:9230]
ENSG00000129951	PLPPR3	3497.1	1827.7	1000.9	-0.94	-0.87	phospholipid phosphatase related 3 [Source:HGNC Symbol;Acc:HGNC:23497]
ENSG00000114698	PLSCR4	431.6	150.4	79	-1.52	-0.93	phospholipid scramblase 4 [Source:HGNC Symbol;Acc:HGNC:16497]
ENSG00000185664	PMEL	333.9	87.8	52.4	-1.93	-0.76	premelanosome protein [Source:HGNC Symbol;Acc:HGNC:10880]
ENSG00000183837	PNMA3	664.9	223.4	71.5	-1.57	-1.65	paraneoplastic Ma antigen 3 [Source:HGNC Symbol;Acc:HGNC:18742]
ENSG00000100344	PNPLA3	289.9	86.1	48.1	-1.75	-0.84	patatin like phospholipase domain containing 3 [Source:HGNC Symbol;Acc:HGNC:18590]
ENSG00000143847	PPFIA4	1221.5	709.7	277.4	-0.78	-1.36	PTPRF interacting protein alpha 4 [Source:HGNC Symbol;Acc:HGNC:9248]
ENSG00000135447	PPP1R1A	636.6	69.4	29.7	-3.2	-1.23	protein phosphatase 1 regulatory inhibitor subunit 1A [Source:HGNC Symbol;Acc:HGNC:9286]
ENSG00000131771	PPP1R1B	251.7	104.6	20.8	-1.27	-2.34	protein phosphatase 1 regulatory inhibitor subunit 1B [Source:HGNC Symbol;Acc:HGNC:9287]
ENSG00000162148	PPP1R32	504.9	131.8	50.7	-1.94	-1.38	protein phosphatase 1 regulatory subunit 32 [Source:HGNC Symbol;Acc:HGNC:28869]
ENSG00000173281	PPP1R3B	2187.9	896.2	401	-1.29	-1.16	protein phosphatase 1 regulatory subunit 3B [Source:HGNC Symbol;Acc:HGNC:14942]
ENSG00000119938	PPP1R3C	1199.9	626.1	300.3	-0.94	-1.06	protein phosphatase 1 regulatory subunit 3C [Source:HGNC Symbol;Acc:HGNC:9293]
ENSG00000027075	PRKCH	229.9	40.3	17.7	-2.51	-1.22	protein kinase C eta [Source:HGNC Symbol;Acc:HGNC:9403]
ENSG00000171867	PRNP	1213.6	138.7	10.5	-3.13	-3.72	prion protein [Source:HGNC Symbol;Acc:HGNC:9449]
ENSG00000228672	PROB1	416	177.1	52.6	-1.23	-1.77	proline rich basic protein 1 [Source:HGNC Symbol;Acc:HGNC:41906]
ENSG00000230461	PROX1-AS1	723.6	405.5	130	-0.84	-1.64	PROX1 antisense RNA 1 [Source:HGNC Symbol;Acc:HGNC:43656]
ENSG00000164099	PRSS12	620.2	167.4	30.2	-1.89	-2.47	protease, serine 12 [Source:HGNC Symbol;Acc:HGNC:9477]
ENSG00000112812	PRSS16	797.7	249	136.3	-1.68	-0.87	protease, serine 16 [Source:HGNC Symbol;Acc:HGNC:9480]
ENSG00000005001	PRSS22	2586.2	42.2	4.9	-5.93	-3.11	protease, serine 22 [Source:HGNC Symbol;Acc:HGNC:14368]
ENSG00000151006	PRSS53	233.9	124.9	67.9	-0.91	-0.88	protease, serine 53 [Source:HGNC Symbol;Acc:HGNC:34407]
ENSG00000052344	PRSS8	5851	401.2	52.5	-3.87	-2.93	protease, serine 8 [Source:HGNC Symbol;Acc:HGNC:9491]
ENSG00000059915	PSD	223.9	89.8	28.9	-1.32	-1.63	pleckstrin and Sec7 domain containing [Source:HGNC Symbol;Acc:HGNC:9507]
ENSG00000146005	PSD2	517	114	13.6	-2.18	-3.07	pleckstrin and Sec7 domain containing 2 [Source:HGNC Symbol;Acc:HGNC:19092]
ENSG00000124212	PTGIS	2185.6	500.9	241.4	-2.13	-1.05	prostaglandin I2 synthase [Source:HGNC Symbol;Acc:HGNC:9603]
ENSG00000110786	PTPN5	247.7	6.5	0.7	-5.25	-3.3	protein tyrosine phosphatase, non-receptor type 5 [Source:HGNC Symbol;Acc:HGNC:9657]
ENSG00000080031	PTPRH	241	69.9	24.1	-1.79	-1.54	protein tyrosine phosphatase, receptor type H [Source:HGNC Symbol;Acc:HGNC:9672]
ENSG00000168994	PXDC1	559.7	197.1	90.6	-1.51	-1.13	PX domain containing 1 [Source:HGNC Symbol;Acc:HGNC:21361]
ENSG00000115828	QPCT	723.7	267.7	120.5	-1.44	-1.15	glutaminyl-peptide cyclotransferase [Source:HGNC Symbol;Acc:HGNC:9753]
ENSG00000139832	RAB20	261.7	114.1	42.8	-1.2	-1.42	RAB20, member RAS oncogene family [Source:HGNC Symbol;Acc:HGNC:18260]
ENSG00000132698	RAB25	3480	102.8	10.5	-5.08	-3.3	RAB25, member RAS oncogene family [Source:HGNC Symbol;Acc:HGNC:18238]
ENSG00000154917	RAB6B	1290.4	277.1	125.5	-2.22	-1.15	RAB6B, member RAS oncogene family [Source:HGNC Symbol;Acc:HGNC:14902]
ENSG00000128340	RAC2	362.3	147.3	58.7	-1.3	-1.33	ras-related C3 botulinum toxin substrate 2 (rho family, small GTP binding protein Rac2) [Source:HGNC Symbol;Acc:HGNC:9802]
ENSG00000131831	RAI2	309.4	58.7	8.8	-2.4	-2.73	retinoic acid induced 2 [Source:HGNC Symbol;Acc:HGNC:9835]
ENSG00000079337	RAPGEF3	223	109.5	28.7	-1.03	-1.94	Rap guanine nucleotide exchange factor 3 [Source:HGNC Symbol;Acc:HGNC:16629]
ENSG00000106538	RARRES2	964.5	459.9	133.7	-1.07	-1.78	retinoic acid receptor responder 2 [Source:HGNC Symbol;Acc:HGNC:9868]
ENSG00000198915	RASGEF1A	255.4	44.1	4.8	-2.53	-3.21	RasGEF domain family member 1A [Source:HGNC Symbol;Acc:HGNC:24246]
ENSG00000138670	RASGEF1B	325.6	41.7	7.8	-2.96	-2.41	RasGEF domain family member 1B [Source:HGNC Symbol;Acc:HGNC:24881]
ENSG00000203867	RBM20	334.2	104.8	20.8	-1.67	-2.33	RNA binding motif protein 20 [Source:HGNC Symbol;Acc:HGNC:27424]
ENSG00000139890	REM2	504.8	171.2	91.2	-1.56	-0.91	RRAD and GEM like GTPase 2 [Source:HGNC Symbol;Acc:HGNC:20248]
ENSG00000117152	RGS4	274.9	147.7	47.6	-0.89	-1.64	regulator of G-protein signaling 4 [Source:HGNC Symbol;Acc:HGNC:10000]
ENSG00000135828	RNASEL	260.6	100.9	38	-1.37	-1.4	ribonuclease L [Source:HGNC Symbol;Acc:HGNC:10050]
ENSG00000146373	RNF217	866.1	523.5	302.5	-0.73	-0.79	ring finger protein 217 [Source:HGNC Symbol;Acc:HGNC:21487]
ENSG00000185008	ROBO2	7405.9	1613.1	505	-2.2	-1.68	roundabout guidance receptor 2 [Source:HGNC Symbol;Acc:HGNC:10250]
ENSG00000154134	ROBO3	246.4	25.9	7.8	-3.25	-1.68	roundabout guidance receptor 3 [Source:HGNC Symbol;Acc:HGNC:13433]
ENSG00000072133	RPS6KA6	1203.4	697.7	347.3	-0.79	-1.01	ribosomal protein S6 kinase A6 [Source:HGNC Symbol;Acc:HGNC:10435]
ENSG00000189334	S100A14	1208.6	118.6	14.2	-3.35	-3.06	S100 calcium binding protein A14 [Source:HGNC Symbol;Acc:HGNC:18901]
ENSG00000167100	SAMD14	719.4	234.3	124.6	-1.62	-0.92	sterile alpha motif domain containing 14 [Source:HGNC Symbol;Acc:HGNC:27312]
ENSG00000130066	SAT1	7886.4	3921.8	1273.5	-1.01	-1.62	spermidine/spermine N1-acetyltransferase 1 [Source:HGNC Symbol;Acc:HGNC:10540]
ENSG00000183873	SCN5A	250.1	19.1	9.6	-3.71	-1.03	sodium voltage-gated channel alpha subunit 5 [Source:HGNC Symbol;Acc:HGNC:10593]
ENSG00000111319	SCNN1A	4712.8	75.9	26.3	-5.96	-1.53	sodium channel epithelial 1 alpha subunit [Source:HGNC Symbol;Acc:HGNC:10599]
ENSG00000125775	SDCBP2	211.5	108.2	19.8	-0.97	-2.43	syndecan binding protein 2 [Source:HGNC Symbol;Acc:HGNC:15756]
ENSG00000012171	SEMA3B	2185.3	644.1	302	-1.76	-1.09	semaphorin 3B [Source:HGNC Symbol;Acc:HGNC:10724]
ENSG00000137872	SEMA6D	209	121.3	14.9	-0.79	-3	semaphorin 6D [Source:HGNC Symbol;Acc:HGNC:16770]
ENSG00000179918	SEPHS2	2955.8	650.8	283.1	-2.18	-1.2	selenophosphate synthetase 2 [Source:HGNC Symbol;Acc:HGNC:19686]
ENSG00000135919	SERPINE2	1393.5	492.9	138.7	-1.5	-1.83	serpin family E member 2 [Source:HGNC Symbol;Acc:HGNC:8951]
ENSG00000174938	SEZ6L2	3116.6	1003.4	488.5	-1.63	-1.04	seizure related 6 homolog like 2 [Source:HGNC Symbol;Acc:HGNC:30844]
ENSG00000107819	SFXN3	1639.6	245.7	73.1	-2.74	-1.75	sideroflexin 3 [Source:HGNC Symbol;Acc:HGNC:16087]
ENSG00000125731	SH2D3A	1367.9	228.5	53.3	-2.58	-2.1	SH2 domain containing 3A [Source:HGNC Symbol;Acc:HGNC:16885]
ENSG00000214193	SH3D21	1129.7	394.6	175.1	-1.52	-1.17	SH3 domain containing 21 [Source:HGNC Symbol;Acc:HGNC:26236]
ENSG00000035115	SH3YL1	3520.2	821.2	435.4	-2.1	-0.92	SH3 and SYLF domain containing 1 [Source:HGNC Symbol;Acc:HGNC:29546]
ENSG00000162105	SHANK2	2905.4	679.1	383.6	-2.1	-0.82	SH3 and multiple ankyrin repeat domains 2 [Source:HGNC Symbol;Acc:HGNC:14295]
ENSG00000198892	SHISA4	342.9	105.1	38.8	-1.71	-1.45	shisa family member 4 [Source:HGNC Symbol;Acc:HGNC:27139]
ENSG00000158352	SHROOM4	836.6	499.6	290.3	-0.74	-0.79	shroom family member 4 [Source:HGNC Symbol;Acc:HGNC:29215]
ENSG00000187164	SHTN1	847.2	102.1	25.2	-3.05	-2.02	shootin 1 [Source:HGNC Symbol;Acc:HGNC:29319]
ENSG00000185187	SIGIRR	1678.3	358.6	182.8	-2.23	-0.97	single Ig and TIR domain containing [Source:HGNC Symbol;Acc:HGNC:30575]
ENSG00000112246	SIM1	953	154.1	27.8	-2.63	-2.47	single-minded family bHLH transcription factor 1 [Source:HGNC Symbol;Acc:HGNC:10882]
ENSG00000158296	SLC13A3	223.7	55.7	31.8	-2.01	-0.81	solute carrier family 13 member 3 [Source:HGNC Symbol;Acc:HGNC:14430]
ENSG00000146039	SLC17A4	906.8	76	14.7	-3.58	-2.37	solute carrier family 17 member 4 [Source:HGNC Symbol;Acc:HGNC:10932]
ENSG00000101194	SLC17A9	2948.3	200.9	9.7	-3.88	-4.36	solute carrier family 17 member 9 [Source:HGNC Symbol;Acc:HGNC:16192]
ENSG00000106688	SLC1A1	405.2	184.9	107.7	-1.13	-0.78	solute carrier family 1 member 1 [Source:HGNC Symbol;Acc:HGNC:10939]
ENSG00000092096	SLC22A17	799.8	299.1	162.9	-1.42	-0.88	solute carrier family 22 member 17 [Source:HGNC Symbol;Acc:HGNC:23095]
ENSG00000110628	SLC22A18	836.2	65.1	8.2	-3.68	-2.97	solute carrier family 22 member 18 [Source:HGNC Symbol;Acc:HGNC:10964]
ENSG00000153291	SLC25A27	538.8	238.1	104	-1.18	-1.19	solute carrier family 25 member 27 [Source:HGNC Symbol;Acc:HGNC:21065]
ENSG00000146411	SLC2A12	542.4	268.1	92.2	-1.02	-1.54	solute carrier family 2 member 12 [Source:HGNC Symbol;Acc:HGNC:18067]
ENSG00000173262	SLC2A14	1352.8	189	57.4	-2.84	-1.72	solute carrier family 2 member 14 [Source:HGNC Symbol;Acc:HGNC:18301]
ENSG00000059804	SLC2A3	6786.7	695.9	56.4	-3.29	-3.63	solute carrier family 2 member 3 [Source:HGNC Symbol;Acc:HGNC:11007]
ENSG00000110660	SLC35F2	577.8	161.1	35.4	-1.84	-2.18	solute carrier family 35 member F2 [Source:HGNC Symbol;Acc:HGNC:23615]
ENSG00000139540	SLC39A5	2627.9	929.2	289.4	-1.5	-1.68	solute carrier family 39 member 5 [Source:HGNC Symbol;Acc:HGNC:20502]
ENSG00000204385	SLC44A4	1791.4	141.9	14.8	-3.66	-3.25	solute carrier family 44 member 4 [Source:HGNC Symbol;Acc:HGNC:13941]
ENSG00000155465	SLC7A7	894.7	217.4	50.3	-2.04	-2.11	solute carrier family 7 member 7 [Source:HGNC Symbol;Acc:HGNC:11065]
ENSG00000092068	SLC7A8	1437.1	733	127.7	-0.97	-2.52	solute carrier family 7 member 8 [Source:HGNC Symbol;Acc:HGNC:11066]
ENSG00000137491	SLCO2B1	352.2	123.8	35.3	-1.51	-1.81	solute carrier organic anion transporter family member 2B1 [Source:HGNC Symbol;Acc:HGNC:10962]
ENSG00000166750	SLFN5	833	262.1	123	-1.67	-1.1	schlafen family member 5 [Source:HGNC Symbol;Acc:HGNC:28286]
ENSG00000184347	SLIT3	1692.4	411.6	56.4	-2.04	-2.86	slit guidance ligand 3 [Source:HGNC Symbol;Acc:HGNC:11087]
ENSG00000170545	SMAGP	227	99.4	54.3	-1.19	-0.87	small cell adhesion glycoprotein [Source:HGNC Symbol;Acc:HGNC:26918]
ENSG00000178947	SMIM10L2A	884.8	359.5	163.9	-1.3	-1.13	small integral membrane protein 10 like 2A [Source:HGNC Symbol;Acc:HGNC:34499]
ENSG00000108018	SORCS1	1334	620.5	100.3	-1.1	-2.62	sortilin related VPS10 domain containing receptor 1 [Source:HGNC Symbol;Acc:HGNC:16697]
ENSG00000184985	SORCS2	251	119.5	61.5	-1.07	-0.96	sortilin related VPS10 domain containing receptor 2 [Source:HGNC Symbol;Acc:HGNC:16698]
ENSG00000186212	SOWAHB	456.4	119.6	28.1	-1.93	-2.08	sosondowah ankyrin repeat domain family member B [Source:HGNC Symbol;Acc:HGNC:32958]
ENSG00000067066	SP100	264.5	88.6	43.7	-1.58	-1.01	SP100 nuclear antigen [Source:HGNC Symbol;Acc:HGNC:11206]
ENSG00000166145	SPINT1	13755.8	1666.9	252.9	-3.04	-2.72	serine peptidase inhibitor, Kunitz type 1 [Source:HGNC Symbol;Acc:HGNC:11246]
ENSG00000167642	SPINT2	14613.4	4920.2	1603.8	-1.57	-1.62	serine peptidase inhibitor, Kunitz type 2 [Source:HGNC Symbol;Acc:HGNC:11247]
ENSG00000152377	SPOCK1	1275.8	53.3	13.6	-4.58	-1.96	SPARC/osteonectin, cwcv and kazal like domains proteoglycan 1 [Source:HGNC Symbol;Acc:HGNC:11251]
ENSG00000107742	SPOCK2	9186	2099.6	199.2	-2.13	-3.4	SPARC/osteonectin, cwcv and kazal like domains proteoglycan 2 [Source:HGNC Symbol;Acc:HGNC:13564]
ENSG00000118785	SPP1	18386.7	359.2	122.6	-5.68	-1.55	secreted phosphoprotein 1 [Source:HGNC Symbol;Acc:HGNC:11255]
ENSG00000277363	SRCIN1	372.2	86.3	39.1	-2.11	-1.15	SRC kinase signaling inhibitor 1 [Source:HGNC Symbol;Acc:HGNC:29506]
ENSG00000146700	SSC4D	2432.2	600.5	346.8	-2.02	-0.79	scavenger receptor cysteine rich family member with 4 domains [Source:HGNC Symbol;Acc:HGNC:14461]
ENSG00000172830	SSH3	1756.5	721.1	299	-1.28	-1.27	slingshot protein phosphatase 3 [Source:HGNC Symbol;Acc:HGNC:30581]
ENSG00000149418	ST14	6557.6	208.2	18.2	-4.98	-3.51	suppression of tumorigenicity 14 [Source:HGNC Symbol;Acc:HGNC:11344]
ENSG00000178078	STAP2	1458	571	227.6	-1.35	-1.32	signal transducing adaptor family member 2 [Source:HGNC Symbol;Acc:HGNC:30430]
ENSG00000113739	STC2	944	157.2	32.7	-2.59	-2.27	stanniocalcin 2 [Source:HGNC Symbol;Acc:HGNC:11374]
ENSG00000157214	STEAP2	351.4	195.6	74.2	-0.84	-1.4	STEAP2 metalloreductase [Source:HGNC Symbol;Acc:HGNC:17885]
ENSG00000127561	SYNGR3	448.3	153	59.6	-1.55	-1.37	synaptogyrin 3 [Source:HGNC Symbol;Acc:HGNC:11501]
ENSG00000019505	SYT13	1313.7	483.5	187.8	-1.44	-1.36	synaptotagmin 13 [Source:HGNC Symbol;Acc:HGNC:14962]
ENSG00000184292	TACSTD2	945.2	10.1	1	-6.55	-3.33	tumor-associated calcium signal transducer 2 [Source:HGNC Symbol;Acc:HGNC:11530]
ENSG00000168394	TAP1	225.7	43	10.2	-2.39	-2.08	transporter 1, ATP binding cassette subfamily B member [Source:HGNC Symbol;Acc:HGNC:43]
ENSG00000143178	TBX19	209.8	118.7	47.3	-0.82	-1.33	T-box 19 [Source:HGNC Symbol;Acc:HGNC:11596]
ENSG00000165929	TC2N	1483.1	709.2	322	-1.06	-1.14	tandem C2 domains, nuclear [Source:HGNC Symbol;Acc:HGNC:19859]
ENSG00000204219	TCEA3	572.7	247.7	95.6	-1.21	-1.37	transcription elongation factor A3 [Source:HGNC Symbol;Acc:HGNC:11615]
ENSG00000166046	TCP11L2	364.2	127.2	55.7	-1.52	-1.19	t-complex 11 like 2 [Source:HGNC Symbol;Acc:HGNC:28627]
ENSG00000132749	TESMIN	774.2	146.8	86.2	-2.4	-0.78	testis expressed metallothionein like protein [Source:HGNC Symbol;Acc:HGNC:7446]
ENSG00000105825	TFPI2	652.5	53	12.1	-3.62	-2.12	tissue factor pathway inhibitor 2 [Source:HGNC Symbol;Acc:HGNC:11761]
ENSG00000137801	THBS1	1804.3	860.3	442.4	-1.07	-0.96	thrombospondin 1 [Source:HGNC Symbol;Acc:HGNC:11785]
ENSG00000144229	THSD7B	320.6	74.1	22	-2.11	-1.76	thrombospondin type 1 domain containing 7B [Source:HGNC Symbol;Acc:HGNC:29348]
ENSG00000223573	TINCR	291.6	29.8	6.8	-3.29	-2.15	tissue differentiation-inducing non-protein coding RNA [Source:HGNC Symbol;Acc:HGNC:14607]
ENSG00000105289	TJP3	1781.3	217.1	63.1	-3.04	-1.79	tight junction protein 3 [Source:HGNC Symbol;Acc:HGNC:11829]
ENSG00000167608	TMC4	4422.9	183.3	28	-4.59	-2.71	transmembrane channel like 4 [Source:HGNC Symbol;Acc:HGNC:22998]
ENSG00000179178	TMEM125	1151.3	35.2	7.5	-5.03	-2.23	transmembrane protein 125 [Source:HGNC Symbol;Acc:HGNC:28275]
ENSG00000178826	TMEM139	237.8	76.4	13.3	-1.64	-2.53	transmembrane protein 139 [Source:HGNC Symbol;Acc:HGNC:22058]
ENSG00000011638	TMEM159	1091.6	390.7	164.6	-1.48	-1.25	transmembrane protein 159 [Source:HGNC Symbol;Acc:HGNC:30136]
ENSG00000002933	TMEM176A	323.4	80.4	16.7	-2.01	-2.25	transmembrane protein 176A [Source:HGNC Symbol;Acc:HGNC:24930]
ENSG00000198133	TMEM229B	812.7	259.5	63.9	-1.65	-2.03	transmembrane protein 229B [Source:HGNC Symbol;Acc:HGNC:20130]
ENSG00000182107	TMEM30B	1798.5	71	14.3	-4.66	-2.31	transmembrane protein 30B [Source:HGNC Symbol;Acc:HGNC:27254]
ENSG00000121900	TMEM54	539.1	70.2	26.9	-2.94	-1.4	transmembrane protein 54 [Source:HGNC Symbol;Acc:HGNC:24143]
ENSG00000125895	TMEM74B	990.7	337	144.2	-1.56	-1.22	transmembrane protein 74B [Source:HGNC Symbol;Acc:HGNC:15893]
ENSG00000167105	TMEM92	420.9	95	17	-2.15	-2.46	transmembrane protein 92 [Source:HGNC Symbol;Acc:HGNC:26579]
ENSG00000184012	TMPRSS2	1574.1	243.1	24	-2.69	-3.34	transmembrane protease, serine 2 [Source:HGNC Symbol;Acc:HGNC:11876]
ENSG00000137648	TMPRSS4	240.5	25.1	2	-3.26	-3.56	transmembrane protease, serine 4 [Source:HGNC Symbol;Acc:HGNC:11878]
ENSG00000173535	TNFRSF10C	839.6	385.3	140.5	-1.12	-1.45	TNF receptor superfamily member 10c [Source:HGNC Symbol;Acc:HGNC:11906]
ENSG00000127863	TNFRSF19	699.3	126.7	43.5	-2.46	-1.54	TNF receptor superfamily member 19 [Source:HGNC Symbol;Acc:HGNC:11915]
ENSG00000174292	TNK1	311.2	73	39.3	-2.09	-0.89	tyrosine kinase non receptor 1 [Source:HGNC Symbol;Acc:HGNC:11940]
ENSG00000248290	TNXA	240.3	44.4	9.6	-2.44	-2.23	tenascin XA (pseudogene) [Source:HGNC Symbol;Acc:HGNC:11975]
ENSG00000168477	TNXB	1124.5	213.6	46.1	-2.4	-2.22	tenascin XB [Source:HGNC Symbol;Acc:HGNC:11976]
ENSG00000146242	TPBG	1758.4	430.1	254.4	-2.03	-0.76	trophoblast glycoprotein [Source:HGNC Symbol;Acc:HGNC:12004]
ENSG00000168016	TRANK1	1547.6	899	338.1	-0.78	-1.41	tetratricopeptide repeat and ankyrin repeat containing 1 [Source:HGNC Symbol;Acc:HGNC:29011]
ENSG00000132109	TRIM21	511.1	295.1	70.1	-0.79	-2.07	tripartite motif containing 21 [Source:HGNC Symbol;Acc:HGNC:11312]
ENSG00000121236	TRIM6	458.1	67.1	6.4	-2.77	-3.37	tripartite motif containing 6 [Source:HGNC Symbol;Acc:HGNC:16277]
ENSG00000182463	TSHZ2	1329.4	685.9	395.4	-0.95	-0.8	teashirt zinc finger homeobox 2 [Source:HGNC Symbol;Acc:HGNC:13010]
ENSG00000215845	TSTD1	748.6	147.1	10.7	-2.35	-3.77	thiosulfate sulfurtransferase like domain containing 1 [Source:HGNC Symbol;Acc:HGNC:35410]
ENSG00000085831	TTC39A	611	255.2	152.8	-1.26	-0.74	tetratricopeptide repeat domain 39A [Source:HGNC Symbol;Acc:HGNC:18657]
ENSG00000166402	TUB	1402.9	504.6	63.1	-1.48	-3	tubby bipartite transcription factor [Source:HGNC Symbol;Acc:HGNC:12406]
ENSG00000137766	UNC13C	500.7	38.8	9.5	-3.69	-2.03	unc-13 homolog C [Source:HGNC Symbol;Acc:HGNC:23149]
ENSG00000156687	UNC5D	274.6	37	6.6	-2.89	-2.46	unc-5 netrin receptor D [Source:HGNC Symbol;Acc:HGNC:18634]
ENSG00000168140	VASN	1161	652.5	300.8	-0.83	-1.12	vasorin [Source:HGNC Symbol;Acc:HGNC:18517]
ENSG00000112715	VEGFA	15553.1	5905.1	3217	-1.4	-0.88	vascular endothelial growth factor A [Source:HGNC Symbol;Acc:HGNC:12680]
ENSG00000136059	VILL	328.7	64.5	32.1	-2.35	-1.01	villin like [Source:HGNC Symbol;Acc:HGNC:30906]
ENSG00000110002	VWA5A	1030.1	211.6	101.2	-2.28	-1.06	von Willebrand factor A domain containing 5A [Source:HGNC Symbol;Acc:HGNC:6658]
ENSG00000187260	WDR86	1506.4	733.6	169.1	-1.04	-2.12	WD repeat domain 86 [Source:HGNC Symbol;Acc:HGNC:28020]
ENSG00000101443	WFDC2	4922.8	662.8	74.8	-2.89	-3.14	WAP four-disulfide core domain 2 [Source:HGNC Symbol;Acc:HGNC:15939]
ENSG00000018408	WWTR1	2382.3	1365.2	802.3	-0.8	-0.77	WW domain containing transcription regulator 1 [Source:HGNC Symbol;Acc:HGNC:24042]
ENSG00000103489	XYLT1	665.1	46.7	5.8	-3.83	-2.99	xylosyltransferase 1 [Source:HGNC Symbol;Acc:HGNC:15516]
ENSG00000006047	YBX2	470.6	165.1	46.8	-1.51	-1.83	Y-box binding protein 2 [Source:HGNC Symbol;Acc:HGNC:17948]
ENSG00000159714	ZDHHC1	436.7	245.9	143.3	-0.83	-0.78	zinc finger DHHC-type containing 1 [Source:HGNC Symbol;Acc:HGNC:17916]
ENSG00000147394	ZNF185	681.5	226.2	96.8	-1.59	-1.22	zinc finger protein 185 (LIM domain) [Source:HGNC Symbol;Acc:HGNC:12976]
ENSG00000148143	ZNF462	1673.8	820.4	351.3	-1.03	-1.22	zinc finger protein 462 [Source:HGNC Symbol;Acc:HGNC:21684]
ENSG00000197162	ZNF785	1436.2	9.4	1.4	-7.25	-2.84	zinc finger protein 785 [Source:HGNC Symbol;Acc:HGNC:26496]
Supplementary file 1b Regulated genes in CINI expansion. In group 1 there are genes continuously upregulated in p5 and p10, in group 2 genes upregulated at p5 but stable at p10, in group 3 genes downregulated at p5 but stable in p10 and in group 4 genes continuously downregulated.

## Sheet: Supplementary file 1c
Ensembl ID	Gene Symbol	PP P0 1	PP P0 2	PP P0 3	PP P0 4	PP P5 1	PP P5 2	PP P5 2	PP P10 1	PP P10 2	PP P10 3	Description
	TGFB LIGANDS AND RECEPTORS
ENSG00000123999	INHA	843.4	1019	1843	561.6	54.8	111.2	83.9	53.3	44.3	160.1	inhibin alpha subunit [Source:HGNC Symbol;Acc:HGNC:6065]
ENSG00000135414	GDF11	2652.9	2096.8	2374.5	2184.5	3805.2	4513.6	3763.9	3821.8	3624.8	3474.9	growth differentiation factor 11 [Source:HGNC Symbol;Acc:HGNC:4216]
ENSG00000125845	BMP2	3612.9	4345	4084.7	3822.9	795	925.9	541.3	557.3	625.8	668.2	bone morphogenetic protein 2 [Source:HGNC Symbol;Acc:HGNC:1069]
ENSG00000101144	BMP7	462.3	365.9	690.7	281.8	881	699.6	647.1	1017	1126.6	1070.1	bone morphogenetic protein 7 [Source:HGNC Symbol;Acc:HGNC:1074]
ENSG00000163235	TGFA	873.8	713.6	677	830	49.1	75.1	107.9	80.6	50.2	297.5	transforming growth factor alpha [Source:HGNC Symbol;Acc:HGNC:11765]
ENSG00000105329	TGFB1	4806.1	5647.7	4605.8	3378.6	1719.4	2385.6	1740.7	1315.5	997.7	1262.4	transforming growth factor beta 1 [Source:HGNC Symbol;Acc:HGNC:11766]
ENSG00000140682	TGFB1I1	324.4	510.4	436.4	340.4	256.8	470.3	389.5	271.3	198.8	262.7	transforming growth factor beta 1 induced transcript 1 [Source:HGNC Symbol;Acc:HGNC:11767]
ENSG00000092969	TGFB2	680.2	986.1	1285.2	759	248.3	408.8	450.4	405.2	501.8	545.5	transforming growth factor beta 2 [Source:HGNC Symbol;Acc:HGNC:11768]
ENSG00000119699	TGFB3	122.7	165.2	244	280.8	139.7	266.4	294.6	178.2	149.6	337.6	transforming growth factor beta 3 [Source:HGNC Symbol;Acc:HGNC:11769]
ENSG00000115170	ACVR1 (ALK2)	1096.8	1140.1	828.2	997.6	745	844	784.9	816.1	890.5	817.8	activin A receptor type 1 [Source:HGNC Symbol;Acc:HGNC:171]
ENSG00000135503	ACVR1B (ALK4)	4988.5	3393.5	4119	3675.9	4234.9	4002.3	4226.3	4790	5411.6	4635.5	activin A receptor type 1B [Source:HGNC Symbol;Acc:HGNC:172]
ENSG00000139567	ACVRL1 (ALK1)	73	63.1	41.2	46.3	102.9	177.6	121.8	126	92.5	128.8	activin A receptor like type 1 [Source:HGNC Symbol;Acc:HGNC:175]
ENSG00000107779	BMPR1A (ALK3)	2727.9	2159.1	1892.3	2265.8	2062.2	2105.6	2044.2	2215.6	2332.9	2175.9	bone morphogenetic protein receptor type 1A [Source:HGNC Symbol;Acc:HGNC:1076]
ENSG00000106799	TGFBR1 (ALK5)	3434.5	2536.2	3337.8	2969.3	3711.8	4020.9	4519.9	4852.4	4860.6	4615.5	transforming growth factor beta receptor 1 [Source:HGNC Symbol;Acc:HGNC:11772]
ENSG00000138696	BMPR1B (ALK6)	262.6	217.1	210.8	316.8	387.1	189.3	277.6	362.1	361.1	338.4	bone morphogenetic protein receptor type 1B [Source:HGNC Symbol;Acc:HGNC:1077]
ENSG00000121989	ACVR2A	1130.3	1087.3	616.3	1037.8	1319.1	1576.7	1461	1895.6	2210.9	1606.9	activin A receptor type 2A [Source:HGNC Symbol;Acc:HGNC:173]
ENSG00000114739	ACVR2B	6065.1	4850.2	5996.4	5126.1	6700.2	6026.9	6886.7	7592.4	7368.6	5696.1	activin A receptor type 2B [Source:HGNC Symbol;Acc:HGNC:174]
ENSG00000163513	TGFBR2	1845	1911.7	1568.1	1556.1	2177.4	2443.2	2676.4	2859.2	3085.6	2988.5	transforming growth factor beta receptor 2 [Source:HGNC Symbol;Acc:HGNC:11773]
ENSG00000204217	BMPR2	2521.1	2240.4	1966.7	2323.4	1592.9	1741.6	1431.1	1181.6	886.5	796.1	bone morphogenetic protein receptor type 2 [Source:HGNC Symbol;Acc:HGNC:1078]
	FGF LIGANDS AND RECEPTORS
ENSG00000161958	FGF11	143.9	186.8	207.3	166.6	83.1	171.7	73.9	25	27.5	13.1	fibroblast growth factor 11 [Source:HGNC Symbol;Acc:HGNC:3667]
ENSG00000114279	FGF12	120.6	154.8	193.6	90.5	4.7	2	16	4.5	0	3.5	fibroblast growth factor 12 [Source:HGNC Symbol;Acc:HGNC:3668]
ENSG00000129682	FGF13	327.4	286.3	294.4	320.9	165.2	17.6	4	0	0	2.6	fibroblast growth factor 13 [Source:HGNC Symbol;Acc:HGNC:3670]
ENSG00000102466	FGF14	40.5	8.7	191.3	159.4	4.7	35.1	14	1.1	3	0	fibroblast growth factor 14 [Source:HGNC Symbol;Acc:HGNC:3671]
ENSG00000156427	FGF18	524.1	202.4	333.3	269.5	7102.5	9337.5	10310.1	15389.2	17133.1	14785.3	fibroblast growth factor 18 [Source:HGNC Symbol;Acc:HGNC:3674]
ENSG00000138685	FGF2	182.5	179.9	199.3	191.3	338	397.1	430.4	526.7	540.2	281	fibroblast growth factor 2 [Source:HGNC Symbol;Acc:HGNC:3676]
ENSG00000102678	FGF9	243.3	258.6	115.7	194.4	208.7	267.3	356.5	281.5	352.2	459.4	fibroblast growth factor 9 [Source:HGNC Symbol;Acc:HGNC:3687]
ENSG00000077782	FGFR1	5194.3	5720.4	5752.4	5709.2	4498.3	4971.2	5530.5	5199.7	5426.3	4851.3	fibroblast growth factor receptor 1 [Source:HGNC Symbol;Acc:HGNC:3688]
ENSG00000066468	FGFR2	6614.5	3565.6	4030.8	3975.2	2584.3	2414.9	2948	3188.4	3048.2	2617.9	fibroblast growth factor receptor 2 [Source:HGNC Symbol;Acc:HGNC:3689]
ENSG00000068078	FGFR3	19069.1	19176.6	14086.7	16752.3	8439.5	7642.7	7451	7468.7	7231.9	7756.3	fibroblast growth factor receptor 3 [Source:HGNC Symbol;Acc:HGNC:3690]
ENSG00000160867	FGFR4	17274.8	13539.3	11905.8	10908.3	12363.7	11956.3	13309.1	15864.8	17372.2	16522.7	fibroblast growth factor receptor 4 [Source:HGNC Symbol;Acc:HGNC:3691]
	RETINOIC ACID ENZYMES AND RECEPTORS
ENSG00000165092	ALDH1A1	4939.9	3619.2	5576	3361.1	2939.4	301.5	150.8	133.9	100.4	280.1	aldehyde dehydrogenase 1 family member A1 [Source:HGNC Symbol;Acc:HGNC:402]
ENSG00000072042	RDH11	5764	4634.8	4015.9	4820.6	4245.2	3881.3	3865.8	4657.2	5112.5	4684.2	retinol dehydrogenase 11 (all-trans/9-cis/11-cis) [Source:HGNC Symbol;Acc:HGNC:17964]
ENSG00000131759	RARA	1727.4	1833.8	1546.4	1454.3	1559.9	1665.5	1421.1	1047.7	1427.7	1415.5	retinoic acid receptor alpha [Source:HGNC Symbol;Acc:HGNC:9864]
ENSG00000172819	RARG	757.3	951.5	565.9	747.7	428.7	818.6	976.7	416.6	367	509.8	retinoic acid receptor gamma [Source:HGNC Symbol;Acc:HGNC:9866]
ENSG00000186350	RXRA	4378.3	3838.1	3747.9	2973.4	2863.8	2930	3131.8	2952.3	3233.2	3221.7	retinoid X receptor alpha [Source:HGNC Symbol;Acc:HGNC:10477]
ENSG00000204231	RXRB	2076.1	2788.8	2297.8	2653.5	1357.8	1688	1759.6	1351.9	1445.4	1550.4	retinoid X receptor beta [Source:HGNC Symbol;Acc:HGNC:10478]
	NOTCH LIGANDS, RECEPTORS AND EFFECTORS
ENSG00000148400	NOTCH1	7661.7	5343.2	6393.9	6128.8	2647.6	3591.6	5785.2	5212.2	4596.9	5074.9	notch 1 [Source:HGNC Symbol;Acc:HGNC:7881]
ENSG00000134250	NOTCH2	16763.9	15710.5	12306.7	18299.1	8620.8	7134.3	5649.4	5851.2	4526.1	4782.5	notch 2 [Source:HGNC Symbol;Acc:HGNC:7882]
ENSG00000074181	NOTCH3	17704.7	15681.1	14224.2	14245.8	6119.5	7520.7	7685.6	7567.5	6919.9	6783.6	notch 3 [Source:HGNC Symbol;Acc:HGNC:7883]
ENSG00000204301	NOTCH4	173.3	62.3	304.7	254	68	120	116.8	63.6	62	69.6	notch 4 [Source:HGNC Symbol;Acc:HGNC:7884]
ENSG00000101384	JAG1	16083.7	16783.1	15493.3	16498.2	5197	4152.6	7703.6	8393.8	7152.2	7109.9	jagged 1 [Source:HGNC Symbol;Acc:HGNC:6188]
ENSG00000184916	JAG2	499.8	777.7	614	673.7	514.6	605.9	482.4	188.4	175.1	127.9	jagged 2 [Source:HGNC Symbol;Acc:HGNC:6189]
ENSG00000198719	DLL1	1309.7	824.4	3056.1	1230.1	298.4	656.6	1275.3	1228.1	1068.5	1485.1	delta like canonical Notch ligand 1 [Source:HGNC Symbol;Acc:HGNC:2908]
ENSG00000090932	DLL3	50.7	18.2	107.7	37	141.6	714.2	2147.1	1833.1	1437.5	2250.8	delta like canonical Notch ligand 3 [Source:HGNC Symbol;Acc:HGNC:2909]
ENSG00000128917	DLL4	210.9	177.3	207.3	257.1	158.6	239	481.4	754.8	1116.8	1004	delta like canonical Notch ligand 4 [Source:HGNC Symbol;Acc:HGNC:2910]
ENSG00000135547	HEY2	42.6	22.5	34.4	20.6	204	230.3	279.6	388.2	276.5	651.7	hes related family bHLH transcription factor with YRPW motif 2 [Source:HGNC Symbol;Acc:HGNC:4881]
ENSG00000163909	HEYL	13.2	61.4	230.2	26.7	31.2	43.9	70.9	21.6	3.9	52.2	hes related family bHLH transcription factor with YRPW motif-like [Source:HGNC Symbol;Acc:HGNC:4882]
ENSG00000114315	HES1	3889.7	3196.2	4427.2	4020.4	2250.1	2115.3	2153.1	1438.1	1171.9	1011	hes family bHLH transcription factor 1 [Source:HGNC Symbol;Acc:HGNC:5192]
	PDGF LIGANDS AND RECEPTORS
ENSG00000197461	PDGFA	2916.5	2860.6	3699.8	3093.7	674.2	543.5	411.4	99.9	84.6	134	platelet derived growth factor subunit A [Source:HGNC Symbol;Acc:HGNC:8799]
ENSG00000100311	PDGFB	602.2	774.2	1405.5	1009	209.6	153.2	203.7	71.5	49.2	72.2	platelet derived growth factor subunit B [Source:HGNC Symbol;Acc:HGNC:8800]
ENSG00000145431	PDGFC	3190.2	2903	1939.2	2982.7	1256.8	1613.8	1302.2	1300.8	1555.6	1519.9	platelet derived growth factor C [Source:HGNC Symbol;Acc:HGNC:8801]
ENSG00000170962	PDGFD	752.2	1006	723.9	790.9	1437.1	1996.3	919.8	1123.7	1463.1	1545.2	platelet derived growth factor D [Source:HGNC Symbol;Acc:HGNC:30620]
ENSG00000134853	PDGFRA	1655.4	1737	1190.1	1190	1676	1842.1	2531.6	2928.5	1885.2	1650.4	platelet derived growth factor receptor alpha [Source:HGNC Symbol;Acc:HGNC:8803]
ENSG00000113721	PDGFRB	185.5	730.1	224.5	183.1	947.1	1877.3	2766.3	244	150.5	570.7	platelet derived growth factor receptor beta [Source:HGNC Symbol;Acc:HGNC:8804]
	WNT LIGANDS AND RECEPTORS
ENSG00000108379	WNT3	261.5	254.3	286.4	224.2	215.3	159	214.7	263.3	230.2	227.1	Wnt family member 3 [Source:HGNC Symbol;Acc:HGNC:12782]
ENSG00000162552	WNT4	66.9	66.6	148.9	103.9	20.8	59.5	96.9	47.7	39.4	107.9	Wnt family member 4 [Source:HGNC Symbol;Acc:HGNC:12783]
ENSG00000114251	WNT5A	68.9	193.8	119.1	58.6	179.4	336.6	517.3	242.9	130.9	130.5	Wnt family member 5A [Source:HGNC Symbol;Acc:HGNC:12784]
ENSG00000188064	WNT7B	269.7	329.6	583	206.7	59.5	180.5	262.6	130.5	176.1	320.2	Wnt family member 7B [Source:HGNC Symbol;Acc:HGNC:12787]
ENSG00000075290	WNT8B	95.3	85.6	111.1	48.3	179.4	56.6	52.9	61.3	37.4	41.8	Wnt family member 8B [Source:HGNC Symbol;Acc:HGNC:12789]
ENSG00000157240	FZD1	673.1	792.4	465.1	463.9	916.8	1052.8	1350.2	1446.1	1556.6	1479	frizzled class receptor 1 [Source:HGNC Symbol;Acc:HGNC:4038]
ENSG00000180340	FZD2	2048.7	1813.9	2638	1230.1	1495.7	1498.7	2275.9	1972.7	1856.7	1698.3	frizzled class receptor 2 [Source:HGNC Symbol;Acc:HGNC:4040]
ENSG00000104290	FZD3	925.5	662.6	807.5	794	741.2	525.9	629.2	942.1	642.5	705.6	frizzled class receptor 3 [Source:HGNC Symbol;Acc:HGNC:4041]
ENSG00000174804	FZD4	1765.9	1666.9	1276	1444	1192.6	903.5	1127.5	1575.5	1446.4	1305	frizzled class receptor 4 [Source:HGNC Symbol;Acc:HGNC:4042]
ENSG00000163251	FZD5	15558.6	9699.5	14256.2	12792.5	9898.3	6820.2	10908.3	21428.8	24156.4	15162	frizzled class receptor 5 [Source:HGNC Symbol;Acc:HGNC:4043]
ENSG00000164930	FZD6	1025.9	892.7	890	1121.1	851.7	786.4	837.9	756	774.3	738.7	frizzled class receptor 6 [Source:HGNC Symbol;Acc:HGNC:4044]
ENSG00000155760	FZD7	6381.4	3751.6	5849.8	3896	6300.8	3686.2	3317.5	4926.2	5290.6	5034	frizzled class receptor 7 [Source:HGNC Symbol;Acc:HGNC:4045]
ENSG00000177283	FZD8	3356.4	2529.3	2734.2	2241.1	1577.8	2367.1	1882.5	1766.2	1429.6	1171.9	frizzled class receptor 8 [Source:HGNC Symbol;Acc:HGNC:4046]
ENSG00000188763	FZD9	118.6	113.3	214.2	73	322	673.2	712	401.8	247.9	410.7	frizzled class receptor 9 [Source:HGNC Symbol;Acc:HGNC:4047]
ENSG00000162337	LRP5	8074.3	6695.2	6381.3	5915.9	8032.5	8157.9	7562.8	8417.6	7951.1	8160.9	LDL receptor related protein 6 [Source:HGNC Symbol;Acc:HGNC:6698]
ENSG00000070018	LRP6	7345.4	5932.3	6139.6	6303.7	5924.1	5545.9	6335.5	7229.2	5613.3	6482.6	LDL receptor related protein 6 [Source:HGNC Symbol;Acc:HGNC:6698]
ENSG00000185483	ROR1	1913.9	1313.1	1987.4	1268.1	915	810.8	1437.1	1465.4	1686.4	1520.8	receptor tyrosine kinase like orphan receptor 1 [Source:HGNC Symbol;Acc:HGNC:10256]
ENSG00000169071	ROR2	2475.5	1771.6	1802.9	1652.8	3573.9	3735	3801.9	3481.2	3970.1	3370.5	receptor-like tyrosine kinase [Source:HGNC Symbol;Acc:HGNC:10481]
ENSG00000163785	RYK	2336.6	2179	2096.2	2431.4	1962.1	1820.7	1907.4	2388.2	2156.8	2054.1	receptor-like tyrosine kinase [Source:HGNC Symbol;Acc:HGNC:10481]
	HIPPO SIGNALLING PATHWAY COMPONENTS
ENSG00000018408	WWTR1	2269.7	2404.8	2451.3	2403.6	1350.2	1606	1139.5	791.1	671	944.9	WW domain containing transcription regulator 1 [Source:HGNC Symbol;Acc:HGNC:24042]
ENSG00000162105	SHANK2	2731	2718.8	2880.8	3291.2	766.7	918.1	352.5	322.4	423.1	405.4	SH3 and multiple ankyrin repeat domains 2 [Source:HGNC Symbol;Acc:HGNC:14295]
Supplementary file 1c Gene regulation of components of selected signaling pathways during expansion in CINI

## Sheet: Supplementary file 1d 
	Stage	Duration (days)	Basal media	Supplements
	S1 (DE)	3	MCDB131 (Life Technologies, 10372-019) 2.5mM Glucose (Sigma, G8769) 1x Glutmax (Life Technologies, 35050038) 1.5 g/l NaHCO3 (Sigma-Aldrich, S6297) 0.5 % BSA (Serva, 11945) 1x Pen/Strep (Life technologies, 15140-122)	100 ng/ml Activin A (Peprotech, 120-14P) (all three days)
				3.0 μM of CHIR (Tocris, SML1046) (1st day)
				0.3 μM of CHIR (Tocris, SML1046) (2nd day)
	S2 (PGT)	2		50 ng/ml FGF7 (Peprotech, 100-19)
				0.25 mM Vitamin C (Tocris, 4055)
				IWP-2 (Tocris, 3533)
	S3 (PF)	2	MCDB131 (Life Technologies, 10372-019) 4.5 mM Glucose (Sigma, G8769) 1x Glutmax (Life Technologies (35050038) 1.5 g/l NaHCO3 (Sigma-Aldrich S6297) 2% BSA (Serva, 11945) 1x Pen/Strep (Life technologies, 15140-122) 0.5% IST-X (Life technologies, 51500056)	50 ng/ml FGF7 (Peprotech, 100-19)
				0.25 mM Vitamin C (Tocris, 4055)
				0.25 μM SANT1 (Sigma, S4572)
				100 nM LDN (Sigma, SML0559)
				1 μM Retinoic Acid (Sigma, R2625)
				200 nM TPB (Merck, 565740)
	S4 (PP)	3		0.25 mM Vitamin C (Tocris, 4055)
				2 ng/ml FGF7 (Peprotech, 100-19)
				0.25 μM SANT1 (Sigma, S4572)
				0.1 μM Retinoic Acid (Sigma, R2625)
				200 nM LDN (Sigma, SML0559)
				100 nM TPB (Merck, 565740)
	S5 (PEP)	4	MCDB131 (Life Technologies, 10372-019) 14.5 mM Glucose (Sigma, G8769 1x Glutmax (Life Technologies, 35050038) 1.5 g/l NaHCO3 (Sigma-Aldrich, S6297) 2% BSA (Serva, 11945) 1x Pen/Strep (Life Technologies, 15140-122) 0.5 x IST-X (Life Technologies, 51500056) 1.8u/ml Heparin (Sigma, 2106-10VL)	0.25 μM SANT1 (Sigma, S4572)
				0.05 μM Retinoic Acid (Sigma, R2625)
				100 nM LDN (Sigma, SML0559)
				10 μM ALK5i (Milltenybiotech, 130117340)
				1 μM T3 (Sigma, T6397)
				10 μM ZnSO4 (Sigma, Z0251)
				100 nM LDN (Sigma, SML0559)
	S6	7		10 nM XX (Millipore, 565789)
				10 μM ALK5i (Millteny Biotech, 130117340)
				1 μM T3 (Sigma, T6397)
				10 μM ZnSO4 (Sigma, Z0251)
	S7	10-14	MCDB131 (Life Technologies, 10372-019) 1x Glutmax (Life Technologies, 35050038) 1.5 g/l NaHCO3 (Sigma-Aldrich, S6297) 0.5 mM Sodium Pyruvate (Lonza BE13-115E) 2% BSA (Serva, 11945) 1x Pen/Strep (Life Technologies, 15140-122) 0.5 x IST-X (Life Technologies, 51500056) 1.8u/ml Heparin (Sigma, 2106-10VL)
				1mM N-Cyst (Sigma, A9165)
				2 μM R428 (Selleckchem, S2841)
				10 μM ALK5i (Millteny Biotech, 130117340)
				1 μM T3 (Sigma, T6397)
				10 μM ZnSO4 (Sigma, Z0251)
				10 μM Trolox (Millipore, 648471)
	Supplementary file 1d Basal media and supplements for S1-S7

## Sheet: Supplementary file 1e
	GENE SYMBOL	PP (Ma et al)	PP FEEDER p9	PP FEEDER p9	PP FEEDER p21	PP FEEDER p21	PP (Nakamura et al)	PP (Nakamura et al)	PP (Nakamura et al)	PP FN p2	PP FN p2	PP FN p2	PP FN p10	PP FN p10	PP FN p10	PP (this study)	PP (this study)	PP (this study)	PP VTN-N p5	PP VTN-N p5	PP VTN-N p5	PP VTN-N p5	PP FN VTN-N p10	PP FN VTN-N p10
		DUCT MARKERS
	AQP1	193.2	2.4	7.6	19.5	17.6	12	23.8	20.6	94.3	8.1	13.1	17.5	13.9	13.1	20.2	20.1	18.5	131.3	28	35.1	637.1	446.2	110.3
	AREG	82.9	38.9	44.6	137.2	138.5	12	1.6	17.3	1149.4	2282.9	5098.8	117.6	853.3	65.3	23.4	2.1	8.1	1022.7	1745.4	1523	1202.9	763.2	1245.1
	C3	32.5	5.9	14	11.9	11.3	91.4	87.4	27.1	14809.2	14360	2609.5	5545.3	72876.2	3744	5	3.1	9	1752.6	2853.3	2622.9	2742.7	7476.6	4791.6
	CA2	403.1	1263.8	1209.9	1154.2	1317.3	895.6	1109.7	504.3	4408.4	881	778.7	735.1	399.7	750.5	196.5	137.9	164.5	1517.5	2133.1	1896.3	3742.3	6485.9	8136.2
	CA8	263.5	34.2	35.7	16.2	25.2	18.8	78.6	124.5	29.2	16.9	32.8	4.9	71.9	16.6	175.9	146.2	199.5	189.4	145.9	132.9	129.6	96.3	33.6
	CFTR	184.8	1605.4	1554.1	2634.7	2484.8	51.2	79.4	27.1	2047.8	256.4	194.7	5.6	18	3.6	67.8	38.1	85.8	13266.8	5428.2	5922	3744.1	1122.8	1113.5
	GLIS3	339.1	1270.9	1213.7	1451.4	1671.2	909.2	405.9	594.1	1397.2	2479.8	2157.8	1015.8	1407.4	794.4	412.6	501.3	389.6	1091.4	1289.5	1211.4	1055.1	430.3	780.1
	HES1	3714.3	1656	1634.5	1240.6	1610.7	6716.5	4262.4	4247.7	2415.6	2573.1	2197.2	1848.2	2769	2623.1	1042.8	1485.8	1962.7	1389.2	1303.5	1326	1375.1	1963.4	1540.7
	KRT18	8873.3	14574.2	15178	18441	18094.8	11144	7325.3	8853.5	10092.1	14751.6	21729.4	5002.8	11179.7	6217.4	9107.1	7360.7	6303.9	27753.8	30001.1	28695.1	25613.6	26148	25318.1
	KRT19	17083	7687.5	7520.8	5829.3	5644.5	29424.6	20220.5	18347.8	13215.1	14536.3	28208.4	7394.2	7675.2	7378.8	11320	10262.3	9854.4	18457.5	25466.1	24719.3	24270.6	35268.8	32968.7
	KRT23	2.1	0	0	0	0	0.9	3.2	7.6	28.4	18.4	43.7	2.1	8.2	0	1.4	8.7	2.8	311.5	1361.3	1346.8	568.2	216.2	311
	MUC1	61.9	7.1	1.3	10.8	13.9	75.1	122.3	145	27.5	43.4	106.1	49.7	46.6	35.6	99.4	73.6	81.5	83.5	87.2	66.7	168.2	560.4	154.6
	ONECUT1	720.2	639.5	663	1044	1123.4	8662.2	5990.1	2705.5	1622.4	2810.4	1600.1	3610.3	3878.9	2834.4	2627.8	2674.7	3602.2	604.7	314.5	314.2	562.9	478.9	520.5
	P2RY1	233.1	319.2	292	269.1	330	121.2	107.2	77.9	266.9	139.6	201.2	85.4	64.6	54.6	85.6	189.4	159.3	2088.6	1213.6	1178.8	2686	800.1	1923.7
	PROX1	1488.7	440.5	436	473.3	591.9	6543.2	9068.9	5728.1	2403.1	2421	1825.4	2677.8	2412.6	1753.9	3269.4	1815.2	3032.5	1795.9	1419.6	1348.4	1469.1	1130.5	1282.9
	SERPINE1	117.6	15.3	30.6	121	68	11.1	7.9	8.7	913.4	1081.6	3031.7	107.1	1549.6	76	4.1	4.6	6.2	428.6	329.8	324.9	565.2	1668.3	623.1
	SLC4A4	2134.3	6380.2	6620.7	7656.7	7638.1	2406.7	2667.4	3732.5	1386.3	4273.3	5668.6	1735.5	5271.5	1625.6	7167.2	8939.1	8765.7	7639.3	3890.7	4045.6	5796	4139.4	5073.1
	SPP1	2234.1	146	172.1	480.9	231.7	19.6	17.5	66	1087.7	5634.8	4726.9	93.1	1069.8	68.9	4.6	11.8	14.2	5278.8	965.5	926.8	11301.7	4055.9	7742.7
	TM4SF1	531.2	346.3	335.3	442	389.1	18.8	7.9	30.3	2431.5	5426.1	6328.1	391.3	11073.5	399	13.3	79.3	71.6	18016.7	18004.3	16945.3	21118.6	44632.4	42232
		ACINAR MARKERS
	BHLHA15	69.3	18.8	3.8	5.4	10.1	82	56.4	54.1	96.8	65.4	62.3	73.5	206	112.8	49	45.8	37	38.2	35.2	39.2	26.3	75.8	70.8
	CPA1	31.5	3.5	3.8	1.1	0	50.4	171.6	362.5	24.2	41.9	15.3	56.7	258.3	73.6	370.5	407.1	333.2	107.9	76.4	67.7	99.8	183.9	46
	CPA2	137.5	55.4	54.8	72.4	60.5	52.9	208.9	1167.7	1005.1	181.5	591.7	12.6	23.7	11.9	1209.9	686	465.9	174.1	67.3	58	75.3	95.3	34.2
	CPE	8624.4	5380.2	5678.5	7232	6126.9	5353	8237.2	14201.8	4435.1	3617.2	9883.7	2123.3	1740.8	1979.5	11898.4	12162.4	8479.4	1084.8	2116.8	1978.3	1738.3	865.7	646.2
	PRSS1	563.8	0	0	0	0	2460.5	873.8	690.4	59.2	54.4	82	10.5	0	13.1	776.7	327.3	478.7	78.4	59.6	75.9	63.1	44.6	31.3
	PTF1A	390.5	1.2	3.8	0	2.5	35.9	278	526	9.2	16.9	21.9	3.5	6.5	2.4	910.9	1059.2	1111.9	23.4	8.6	14.8	24.5	7.2	7.1
	RBPJL	8.4	0	0	1.1	0	3.4	4.8	15.2	0	1.5	0	0	0	0	16.5	13.9	7.1	2.5	0.9	0.5	0.6	1.5	0
	RHOV	42	76.6	70.1	53	34	14.5	19.1	49.8	20	58	68.9	22.4	14.7	17.8	64.1	30.9	25.6	252.5	211	190.4	182.2	329.4	213
	RNASE1	463	23.6	5.1	2.2	8.8	226.2	218.4	212.1	344.5	141.1	295.3	105	10.6	71.2	69.6	84.9	72	422.5	702.1	721.5	2276.7	3439.6	6507
		ENDOCRINE MARKERS
	CHGA	695	86	76.5	120	107	4801.5	69260.3	186320	2314.7	607.6	38794.3	2913	121.8	4327	200359	129424	130414	735.1	2445.7	2614.3	425.1	34.8	59
	FOXA2	5814	2578.2	2547.3	1739.9	2128.4	8755.2	6473.8	5619.9	1817.6	2775.9	2445.5	3828	3827.4	4645.3	4742.2	5137.3	5373.9	1249.7	947.5	973.1	1215.1	2105.3	1690
	GCG	2.1	0	0	0	0	0.9	16.7	21.6	203.5	0.7	177.2	0	0	0	3498.9	265.6	646.5	31.1	8.1	15.3	21.6	0	0
	GP2	121.8	107.2	144.1	121	113.3	3.4	11.1	23.8	218.5	912.6	766.7	662.3	962	374	26.1	335	250.7	4324.9	2274.9	2663.6	11226.4	19630.3	42497
	INS	0	0	0	0	0	0	5.6	37.9	14.2	0	122.5	0	0	0	1446.3	152.3	207.1	55	14	10.2	1.2	0	0
	INSM1	1109.7	14.1	30.6	15.1	15.1	5338.5	9952.2	13277.6	25	2.2	382.8	100.8	2.5	59.4	9522.5	9133.7	10944.6	29.5	28.9	32.6	35	2	13.6
	NEUROD1	4.2	3.5	1.3	2.2	7.6	312.5	1630.8	3583.2	34.2	7.3	390.4	16.1	1.6	28.5	3542.8	2816.7	3015.9	8.7	23	21.9	7.6	1	0.6
	NEUROG3	76.6	7.1	5.1	3.2	6.3	1583.7	4181.4	6948.9	8.3	1.5	28.4	103.6	0	87.9	5728.7	3341.2	4558.2	3.1	5.4	8.7	2.9	1	2.4
	NKX2-2	6.3	7.1	2.5	2.2	2.5	385.9	1411.5	1876.5	6.7	1.5	103.9	59.5	0.8	39.2	2264.2	1978.4	2249.5	39.2	9	10.7	10.5	14.3	7.1
	NKX6-1	1023.6	8015	7936.4	6082.1	6630.6	25.6	85.8	630.9	113.4	435.7	200.1	198.8	3153.1	141.3	4035.1	4299.5	3862.9	3742	2798.1	3072	2324.6	1203.2	557.6
	NKX6-1/2	1029.9	8022.1	7938.9	6084.3	6633.1	411.5	1497.3	2507.4	120.1	437.2	304	258.3	3153.9	180.5	6299.3	6277.9	6112.4	3781.2	2807.1	3082.7	2335.1	1217.5	564.7
	NKX6-2	30.4	150.8	110.9	69.2	39	228	94.5	305.2	158.5	609.8	790.7	242.9	2281.1	204.2	84.7	214.6	192	3023.7	1109.7	1153.3	1773.9	9458.9	6797.3
	PAX4	0	0	1.3	3.2	3.8	456.8	1885.7	2937.1	5	1.5	62.3	119.7	4.9	76	1649.1	1461.6	1775.5	1	1.4	2	0	0	1.2
	PDX1	8992.9	4343.7	4163.9	3638.7	3659.8	5416.2	4585.7	4899.2	2253.8	3435.7	2748.4	3502.5	5169.4	3435.3	6426.2	6605.7	7738.6	4483.7	3508.4	3628.1	3707.3	3384.3	4136
	RBPJ	1679	1989	1754	1969	1748	3739	3439	1966	2164	2760	1349	3393	2776	2124	5470	5293	6340	4240	4122	3440	3164	2601	5665
	RFX3	578.5	578.3	534.2	574.9	654.9	2177.9	4541.2	2753.1	506.3	758.3	627.8	997.6	903.1	1118.6	2584.3	2080.8	2599.8	468.3	687.7	596.8	444.4	650.5	356.4
	RFX6	498.7	770.3	842.7	1090.4	1134.7	4794.7	4672.3	2617.9	1620.7	122.7	398.1	1599.7	111.2	1505.7	2897.1	1990.2	2557.1	6.1	21.2	23.9	6.4	3.6	11.8
	SOX9	5365.7	6138.7	6062.3	4409.2	6196.1	6647.3	6361	8838.4	6009.9	12498.9	5132.7	8767.1	10194.1	8092.4	5849.1	6377.1	5710	3517	3217.4	3148.4	3604.5	5707.8	3450.3
		MPC AND BP MARKERS
	PTF1A	390.5	1.2	3.8	0	2.5	35.9	278	526	9.2	16.9	21.9	3.5	6.5	2.4	910.9	1059.2	1111.9	23.4	8.6	14.8	24.5	7.2	7.1
	CPA1	32	4	4	1	0	50	172	363	24	42	15	57	258	74	371	407	333	108	76	68	100	184	46
	DCDC2A	99.7	111.9	121.1	135.1	108.3	358.6	321.7	606	1855.1	4050.7	3232.9	614.7	2372.6	881.1	96.6	36	37.9	258.6	787.1	757.7	973.4	266.4	1457.5
		LIVER AND GUT MARKERS
	AFP	43055.1	2378	2604.7	2635.8	2653.5	9237.6	32423.1	14262.4	1268706	234011	120526	183745	131218	148309	12314.7	2595.9	11978.3	5297.7	9358.2	9315.4	35124.4	26675.6	18942.7
	CDX2	2575.3	3850.2	3689.6	3443.1	3258	3133.3	1604.6	1050.8	4201.5	905.2	1650.4	2233.3	644.8	2497.2	156.2	129.7	172.1	3189.7	5360.4	5287.6	3294.5	1736.5	2418.8
	HHEX	10314.7	336.9	401.6	571.7	758.1	6611.5	4817.6	3701.2	2068.6	3767.8	2961.7	2278.8	2649.7	1793	961.3	299	612.9	743.2	487.5	539.8	724.1	248.9	229
	TTR	5295.4	77.7	94.3	141.6	110.8	12131.8	8679.7	4551.8	183515	11224.1	34772.8	1889.5	2589.2	1637.5	2983.6	1322.7	2314.9	621	1147.2	1068.3	1933.9	847.7	645.6
	Supplementary file 1e Normalised RNA-Seq counts of selected genes from feeder expanded cells, fibronectin expanded cells and vitronectin-N expanded cells

## Sheet: Supplementary file 1f
	Antigen	Species	Supplier, cat no	Application	Dilution
	AFP	Mouse	Abcam, ab3980	IF	1:200
	CDX2	Rabbit	Abcam, ab76541	IF	1:100
	C-PEP-Alexa 647	Mouse	BD pharmigen, 565831	FC	1:200
	FOXA2	Rabbit	Merck, 07-633	IF	1:200
	GCG	Mouse	Sigma, G2654	IF	1:500
	GCG	Rabbit	Invitrogen, PA5-13442	FC	1:500
	GP-2	Mouse	MBL D277-3	IF	1:300
	HNF1b	Goat	Santa Cruz, sc-7411	IF	1:50
	INS	Guinea pig	Abam, ab7842	IF	1:1000
	NEUROD1	Mouse	Abcam, ab60704	IF/FC	1:500/1:200
	NGN3	Sheep	R&D, AF3444	IF/FC	1:100
	NKX6.1	Mouse	DSHB (F55A10)	IF/FC	1:500/1:250
	PDX1	Goat	R&D, AF2419	IF/FC	01:40:00
	SOX9	Rabbit	Merck, AB5535	IF/FC	1:1000
	Supplementary file 1f List of primary antibodies for immunofluorescense (IF) and flow cytometry (FC)

## Sheet: Supplementary file 1g
	Antigen	Fluorophore	Species	Supplier, cat no	Dilution
	Goat IgG	Alexa 647	Donkey	Invitrogen, A21447	1:500
	Guinea pig IgG	Alexa 647	Goat	Abcam, ab150187	1:500
	Mouse IgG	Alexa 568	Donkey	Invitrogen, A10037	1:500
	Mouse IgG	Alexa 568	Goat	Invitrogen, A11004	1:500
	Mouse IgG	Alexa 647	Goat	Invitrogen, A21235	1:500
	Mouse IgG isotype	Alexa 647	Goat	BD pharmigen, 557783	1:5
	Rabbit IgG	Alexa 488	Donkey	Invitrogen, A21206	1:500
	Rabbit IgG	Alexa 488	Goat	Invitrogen, A11070	1:500
	Rabbit IgG	Alexa 647	Goat	Invitrogen, A21244	1:500
	Sheep IgG	Alexa 568	Donkey	Invitrogen, A21099	1:500
	Supplementary file 1g List of secondary antibodies

## Sheet: Supplementary file 1h
	Stage	Gene and primer direction	Sequence
	Housekeeping	TBP F	TATCGTGGTCACACTTGTTGAG
		TBP R	ACCATCCTCTGAGACCGTTTT
		PDX1 F	GGAGAAAGATGGACCCCTGG
	PP	PDX1 R	CAGCCTCTACCTCGGAACAG
		FOXA2 F	ACACCACTACGCCTTCAACC
		FOXA2 R	CCTTGAGGTCCATTTTGTGG
		HHEX F	ACGGTGAACGACTACACGC
		HHEX R	CTTCTCCAGCTCGATGGTCT
		TTR F	ACTTGGCATCTCCCCATTC
		TTR R	TAGGAGTAGGGGCTCAGCAG
		PTF1A F	TTCACCGACCAGTCTTCACG
		PTF1A R	GTGGCTAAGGAACTCCACCT
		NKX6.1 F	ATTCGTTGGGGATGACAGAG
		NKX6.1 R	CGAGTCCTGCTTCTTCTTGG
		AFP F	GCAGCAGTCTGAATGTCCGTAC
		AFP R	TGCCCAGTTTGTTCAAGAAGC
		CDX2 F	GCTGGAGAAGGAGTTTCACTACAGT
		CDX2 R	AACCAGATTTTAACCTGCCTCTCA
	S7	PDX1 F	GGAGAAAGATGGACCCCTGG
		PDX1 R	CAGCCTCTACCTCGGAACAG
		NKX6.1 F	ATTCGTTGGGGATGACAGAG
		NKX6.1 R	CGAGTCCTGCTTCTTCTTGG
		GCG F	GAGACATGCTGAAGGGACCT
		GCG R	CTTCCTCGGCCTTTCACCAG
		SST F	AGCTGCTGTCTGAACCCAAC
		SST R	GCTCAAGCCTCATTTCATCC
		GK F	AGCGTGAAGACCAAACACCA
		GK R	ATGCTTGTCCAGGAAGTCGG
		MAFA F	GCGGAGAACGGTGATTTCTA
		MAFA R	GAAGGTGGGAACGGAGAAC
		INS F	AGATCACTGTCCTTCTGCCA
		INS R	CGCACAGGTGTTGGTTCA
		PC1/3 F	TACAAGCACAGAGACGACCG
		PC1/3 R	CGCAGGGTAAGGAAGAAGCA
		SLC30A8 (ZnT8) F	GGCCGTCATGGAGTTTCTT
		SLC30A8 (ZnT8) R	CACCGGTTTCTGTTGGAGTT
	Supplementary file 1h List of forward (F) and reverse (R) primers used for qPCR
